# Supplementary material for: Regio- and stereoselective synthesis of functionalized tetrahydro-benzochromenes and hexahydrochromenochromenones via [4 + 2] annulation of curcumins with nitrochromenes
Source: Royal Society of Chemistry journal article supplement (doi:10.1039/d2ob02211g), 2023-01-01
Supplement: d2ob02211g1.pdf [file d2ob02211g1.pdf]

# Regio- and stereoselective synthesis of functionalized tetrahydrobenzochromenes and hexahydrochromenochromenones via [4+2] annulation of curcumins with nitrochromenes

Banamali Laha, Alati Suresh and Irishi N. N. Namboothiri\*

## Table of contents

| Entry | Content                                                                                                                                         | Page |
|-------|-------------------------------------------------------------------------------------------------------------------------------------------------|------|
| 1     | General information                                                                                                                             | 01   |
| 2     | Experimental procedures and characterization data                                                                                               | 02   |
| 3     | General procedure for the synthesis of racemic double Michael adducts or tetrahydro-benzo[ <i>c</i> ]chromenes                                  | 02   |
| 4     | General procedure for the synthesis of racemic triple Michael adducts or hexahydro-1 <i>H</i> , 6 <i>H</i> -chromeno[6,5- <i>c</i> ]chromenones | 07   |
| 5     | General procedure for the asymmetric synthesis of double Michael adducts or tetrahydro-benzo[ <i>c</i> ]chromenes                               | 10   |
| 6     | <sup>1</sup> H NMR and <sup>13</sup> C NMR chemical shift tables                                                                                | 10   |
| 7     | Table S1. Selected <sup>1</sup> H NMR chemical shift values for double Michael adducts                                                          | 11   |
| 8     | Table S2. Selected <sup>13</sup> C NMR chemical shift values for double Michael adducts                                                         | 12   |
| 9     | Table S3. Selected <sup>1</sup> H NMR chemical shift values for triple Michael adducts                                                          | 13   |
| 10    | Table S4. Selected <sup>13</sup> C NMR chemical shift values for triple Michael adducts                                                         | 14   |
| 11    | Table S5. Crystal data and structure of <b>3c</b>                                                                                               | 15   |
| 12    | Table S6. Crystal data and structure of <b>4i</b>                                                                                               | 16   |
| 13    | Table S7. Selected torsional angles from X-ray data                                                                                             | 17   |
| 14    | References                                                                                                                                      | 18   |

## 1. General information

The melting points recorded are uncorrected. NMR spectra <sup>1</sup>H, <sup>1</sup>H-decoupled <sup>13</sup>C, APT and <sup>1</sup>H-<sup>1</sup>H COSY, were recorded with TMS as the internal standard. The coupling constants (*J* values) are given in Hz. High-resolution mass spectra were recorded under ESI Q-TOF conditions. X-ray data were collected on a diffractometer equipped with graphite monochromated Mo K $\alpha$  radiation ( $\lambda = 0.71073 \text{ \AA}$ ). The structure was determined by direct methods shelxt and refined by full-matrix least-squares against F<sup>2</sup> using olex2 software. Enantioselectivities were determined using a chiral HPLC equipped with a UV detector and a Chiralpak ADH and Chiralpak IC column. Specific rotations were measured for solutions of samples of known concentrations in CH<sub>2</sub>Cl<sub>2</sub> using a polarimeter equipped with a sodium vapor lamp. The curcumins **1**<sup>1</sup> and nitrochromenes **2**<sup>2</sup> were prepared by literature methods.

## 2. Experimental procedures and characterization data

**General procedure for the synthesis of racemic double Michael adducts or tetrahydrobenzo[*c*]chromenes (3).** To a stirred solution of curcumin **1** (0.2 mmol, 1.0 equiv) and nitrochromene **2** (0.2 mmol, 1.2 equiv) in DCM (3.0 mL), Cs<sub>2</sub>CO<sub>3</sub> (1.0 equiv) was added at room temperature. After completion of the reaction (1-2 h, monitored by TLC), the solvent was evaporated, and the crude residue was purified by silica gel column chromatography by eluting with petroleum ether/ethyl acetate to isolate pure double Michael adduct **3**.

**(*E*)-1-(6-(4-Bromophenyl)-7-(3,4-dimethoxyphenyl)-9-hydroxy-6a-nitro-6a,7,8,10a-tetrahydro-6H-benzo[*c*]chromen-10-yl)-3-(3,4-dimethoxyphenyl)prop-2-en-1-one (3a).** Yellow solid; Yield 90% (65

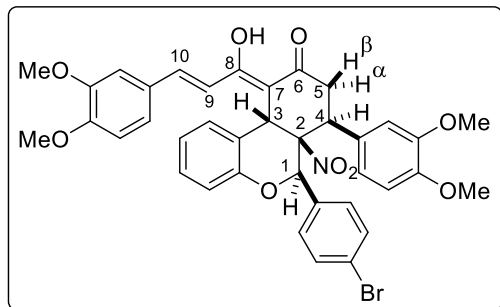

mg); petroleum ether:ethyl acetate (85:15), mp 131-133 °C; IR (KBr film) 3443 (m, br), 2962 (w), 1623 (m), 1517 (s), 1342 (w), 1263 (s); <sup>1</sup>H NMR (CDCl<sub>3</sub>, 400 MHz) δ 2.70 (dd, *J* = 19.0, 5.4 Hz, 1H, *C5-αH*), 2.97 (dd, *J* = 19.0, 13.7 Hz, 1H, *C5-βH*), 3.70 (dd, *J* = 13.7, 5.4 Hz, 1H, *C4-H*), 3.89 (s, 3H, *OCH*<sub>3</sub>), 3.92 (s, 3H, *OCH*<sub>3</sub>), 3.93 (s, 6H, *OCH*<sub>3</sub>), 4.65 (s, 1H, *C3-H*), 5.51 (s, 1H, *C1-H*), 6.63 (d, *J* = 15.2 Hz, 1H, *C10-H*), 6.88 (d, *J* = 8.6 Hz, 1H, *Ar-H*), 6.91-6.95 (m, 4H, *Ar-H*), 6.98 (s, 1H, *Ar-H*), 7.05 (overlapped t, *J* = 8.0 Hz, 1H, *Ar-H*), 7.08 (d, *J* = 8.6 Hz, 1H, *Ar-H*), 7.15 (d, *J* = 8.6 Hz, 1H, *Ar-H*), 7.17 (d, *J* = 8.6 Hz, 1H, *Ar-H*), 7.26 (s, 1H, *Ar-H*), 7.35 (overlapped d, *J* = 8.0 Hz, 2H, *Ar-H*), 7.37 (overlapped t, *J* = 8.0 Hz, 1H, *Ar-H*), 7.89 (d, *J* = 15.2 Hz, 1H, *C9-H*), 16.94 (s, 1H, *C8-H*); <sup>13</sup>C NMR (CDCl<sub>3</sub>, 100 MHz) δ 35.4, 37.1, 41.3, 55.9 (× 2), 56.0, 56.2, 77.6, 91.0, 106.2, 109.9, 110.9, 111.4, 113.4, 116.0, 116.6, 122.5, 122.7, 123.1, 123.5, 123.8, 127.5, 128.0, 128.5, 129.7, 129.9, 131.9, 135.3, 144.0, 148.6, 149.3, 149.4, 151.3, 151.8, 181.1, 191.1; HRMS (ES<sup>+</sup>) *m/z*: [M+H]<sup>+</sup> calcd for C<sub>38</sub>H<sub>35</sub>Br<sup>79</sup>NO<sub>9</sub>, 728.1490; found 728.1487.

**(*E*)-1-(9-Hydroxy-6a-nitro-6,7-diphenyl-6a,7,8,10a-tetrahydro-6H-benzo[*c*]chromen-10-yl)-3-phenylprop-2-en-1-one (3b).** White solid; Yield 93% (98 mg); petroleum ether:ethyl acetate (97:3), mp 232-234 °C; IR (Neat, cm<sup>-1</sup>) 2926 (m), 1627 (s), 1579 (s), 1544 (vs), 1223 (s);

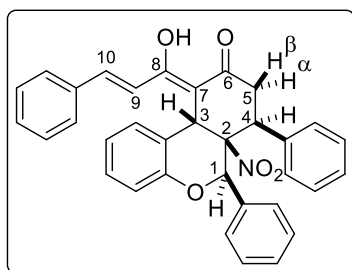

<sup>1</sup>H NMR (CDCl<sub>3</sub>, 500 MHz) δ 2.72 (dd, *J* = 19.0, 5.4 Hz, 1H, *C5-αH*), 3.06 (dd, *J* = 19.0, 13.7 Hz, 1H, *C5-βH*), 3.77 (dd, *J* = 13.7, 5.4 Hz, 1H, *C4-H*), 4.80 (s, 1H, *C3-H*), 5.51 (s, 1H, *C1-H*), 6.84 (d, *J* = 15.5 Hz, 1H, *C10-H*), 7.05 (t overlapped with d, *J* = 7.5 Hz, 1H, *Ar-H*), 7.06 (overlapped d, *J* = 8.6 Hz, 2H, *Ar-H*), 7.18 (d, *J* = 7.5 Hz, 1H, *Ar-H*), 7.21 (d, *J* = 7.5 Hz, 1H, *Ar-H*), 7.27 (t, *J* = 7.3 Hz, 2H, *Ar-H*), 7.34 (t, *J* = 7.5 Hz, 1H, *Ar-H*), 7.38-7.39 (m, 4H, *Ar-H*), 7.42-7.46 (m, 7H, *Ar-H*), 7.95 (d, *J* = 15.5 Hz, 1H, *C9-H*), 16.92 (s, 1H, *C8-H*); Confirmed by <sup>1</sup>H-<sup>1</sup>H COSY; <sup>13</sup>C NMR (CDCl<sub>3</sub>, 125 MHz) δ 35.5, 37.0, 41.6, 78.1, 91.1, 106.7, 116.8, 118.6, 122.2, 122.9, 126.8, 128.5, 128.5, 128.6, 128.9, 129.2, 129.5, 129.7, 129.8, 130.4, 130.7, 135.0, 135.5, 136.1, 143.7, 151.6, 180.7, 192.1; HRMS (ES<sup>+</sup>) *m/z*: [M+Na]<sup>+</sup> calcd for C<sub>34</sub>H<sub>27</sub>NO<sub>5</sub>Na, 552.1781; found 552.1781.

**(E)-1-(6-(4-Bromophenyl)-9-hydroxy-6a-nitro-7-phenyl-6a,7,8,10a-tetrahydro-6H-benzo[*c*]-chromen-10-yl)-3-phenylprop-2-en-1-one (3c).** White solid; Yield 94% (114 mg); petroleum ether:ethyl acetate (97:3), mp 211-213 °C; IR (Neat, cm<sup>-1</sup>) 3441 (s, br), 2923 (s), 1628 (s), 1581 (s), 1544 (vs), 1484 (m), 1454 (m), 1223 (m); <sup>1</sup>H NMR (CDCl<sub>3</sub>, 400 MHz) δ 2.81 (dd, *J* = 19.1, 5.3 Hz, 1H, *C5-αH*), 3.14 (dd, *J* = 19.1, 13.6 Hz, 1H, *C5-βH*), 3.84 (dd, *J* = 13.6, 5.3 Hz, 1H, *C4-H*), 4.81 (s, 1H, *C3-H*), 5.56 (s, 1H, *C1-H*), 6.90 (d, *J* = 15.2 Hz, 1H, *C10-H*), 7.02 (d, *J* = 8.4 Hz, 2H, *Ar-H*), 7.15 (t, *J* = 7.2 Hz, 1H, *Ar-H*), 7.28 (t, *J* = 7.7 Hz, 2H, *Ar-H*), 7.47-7.50 (m, 6H, *Ar-H*), 7.53-7.54 (unresolved m, 7H, *Ar-H*), 8.06 (d, *J* = 15.2 Hz, 1H, *C9-H*), 17.04 (s, 1H, *C8-H*); <sup>13</sup>C NMR (CDCl<sub>3</sub>, 100 MHz) δ 35.5, 36.9, 41.6, 77.7, 91.0, 106.5, 116.9, 118.5, 122.5, 122.8, 123.9, 128.5

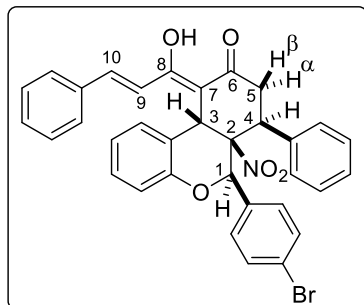

(× 2), 128.6, 128.7, 129.2, 129.5, 130.0, 130.3, 130.8, 132.1, 135.0, 135.1, 135.2, 144.0, 151.3, 180.9, 191.8; HRMS (ES<sup>+</sup>) *m/z*: [M+Na]<sup>+</sup> calcd for C<sub>34</sub>H<sub>26</sub>Br<sup>79</sup>NO<sub>5</sub>Na, 630.0887; found 630.0885.

**(E)-1-(6-(4-Chlorophenyl)-9-hydroxy-6a-nitro-7-phenyl-6a,7,8,10a-tetrahydro-6H-benzo[*c*]-chromen-10-yl)-3-phenylprop-2-en-1-one (3d).** White solid; Yield 91% (102 mg); petroleum ether:ethyl acetate (97:3), mp 203-205 °C; IR (KBr film) 3444 (w, br), 3061 (w), 1628 (s), 1580 (s), 1543 (vs), 1484 (s), 1453 (s), 1354 (w), 1221 (m); <sup>1</sup>H NMR (CDCl<sub>3</sub>, 500 MHz) δ 2.81 (dd, *J* = 19.1, 5.2 Hz, 1H, *C5-αH*), 3.14 (dd, *J* = 19.1, 13.6 Hz, 1H, *C5-βH*), 3.83 (dd, *J* = 13.6, 5.2 Hz, 1H, *C4-H*), 4.81 (s, 1H, *C3-H*), 5.57 (s, 1H, *C1-H*), 6.90 (d, *J* = 15.3 Hz, 1H, *C10-H*), 7.08 (d, *J* = 8.5 Hz, 2H, *Ar-H*), 7.15 (t, *J* = 7.5 Hz, 1H, *Ar-H*), 7.27 (overlapped d, *J* = 7.5 Hz, 1H, *Ar-H*), 7.29 (overlapped d, *J* = 7.5 Hz, 1H, *Ar-H*), 7.33 (d, *J* = 8.5 Hz, 2H, *Ar-H*), 7.46-7.53 (m, 11H, *Ar-H*), 8.05 (d, *J* = 15.3 Hz, 1H, *C9-H*), 17.06 (s, 1H, *C8-H*); Confirmed by <sup>1</sup>H-<sup>1</sup>H COSY and <sup>1</sup>H-<sup>1</sup>H NOESY experiments; <sup>13</sup>C NMR (CDCl<sub>3</sub>, 100 MHz) δ 35.5, 36.9, 41.6, 77.6, 91.1, 106.5, 116.9, 118.5, 122.5, 122.8, 128.3, 128.5, 128.6, 128.7, 129.1, 129.2, 129.5, 130.0, 130.4, 130.8, 134.6, 135.0, 135.3, 135.7, 144.0, 151.3, 180.9, 191.9; HRMS (ES<sup>+</sup>) *m/z*: [M+Na]<sup>+</sup> calcd for C<sub>34</sub>H<sub>26</sub>Cl<sup>35</sup>NO<sub>5</sub>Na, 586.1392; found 586.1391.

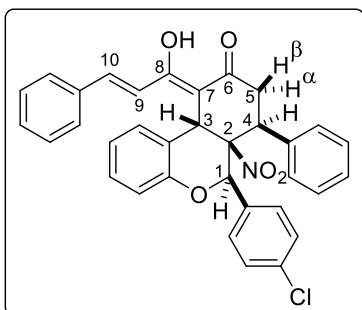

**(E)-1-(6-(4-Fluorophenyl)-9-hydroxy-6a-nitro-7-phenyl-6a,7,8,10a-tetrahydro-6H-benzo[*c*]-chromen-10-yl)-3-phenylprop-2-en-1-one (3e).** White solid; Yield 85% (93 mg); petroleum ether:ethyl acetate (97:3), mp 219-221 °C; IR (Neat, cm<sup>-1</sup>) 3535 (w, br), 2929 (s), 1629 (m), 1606 (m), 1581 (m), 1545 (s), 1265 (s); <sup>1</sup>H NMR (CDCl<sub>3</sub>, 400 MHz) δ 2.72 (dd, *J* = 19.1, 5.4 Hz, 1H, *C5-αH*), 3.05 (dd, *J* = 19.1, 13.7 Hz, 1H, *C5-βH*), 3.75 (dd, *J* = 13.7, 5.4 Hz, 1H, *C4-H*), 4.74 (s, 1H, *C3-H*), 5.49 (s, 1H, *C1-H*), 6.82 (d, *J* = 15.4 Hz, 1H, *C10-H*), 6.95 (t, *J* = 8.5 Hz, 2H, *Ar-H*), 7.02-7.08 (m, 3H, *Ar-H*), 7.18 (t, *J* = 8.5 Hz, 2H, *Ar-H*), 7.36-7.47 (m, 11H, *Ar-H*), 7.96 (s, *J* = 15.4 Hz, 1H, *C9-H*), 16.94 (s, 1H, *C8-H*); <sup>13</sup>C NMR (CDCl<sub>3</sub>, 100 MHz) δ 35.4, 37.0, 41.6, 77.6, 91.2, 106.5, 115.9 (d, *J* = 21.5 Hz), 116.9, 118.5, 122.5, 122.8, 128.5 (× 2), 128.7, 128.8 (d, *J* = 8.3 Hz), 129.2, 129.5, 130.0, 130.4, 130.8, 132.0 (d, *J* = 3.3 Hz), 135.0, 135.3, 144.0, 151.4, 163.3 (d, *J* = 248.0 Hz), 180.8, 192.0; <sup>19</sup>F NMR (376 MHz, CDCl<sub>3</sub>) δ -111.41; HRMS (ES<sup>+</sup>) *m/z*: [M+H]<sup>+</sup> calcd for C<sub>34</sub>H<sub>27</sub>FNO<sub>5</sub>, 548.1868; found 548.1869.

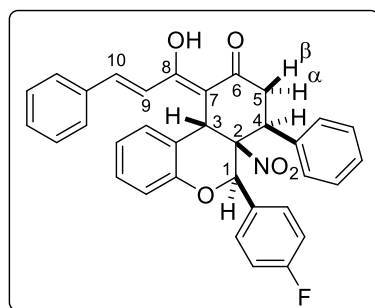

**(E)-1-(9-Hydroxy-6-(3-methoxyphenyl)-6a-nitro-7-phenyl-6a,7,8,10a-tetrahydro-6H-benzo[c]-chromen-10-yl)-3-phenylprop-2-en-1-one (3f).** White solid; Yield 96% (107 mg); petroleum ether:ethyl

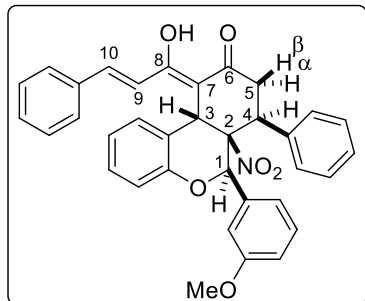

acetate (95:5), mp 195-197 °C; IR (KBr film) 3436 (m, br), 2932 (w), 1627 (s), 1603 (s), 1545 (vs), 1583 (s), 1545 (vs), 1483 (s), 1451 (s), 1221 (m); <sup>1</sup>H NMR (CDCl<sub>3</sub>, 400 MHz) δ 2.71 (dd, *J* = 19.1, 5.6 Hz, 1H, C5-*α*H), 3.04 (dd, *J* = 19.1, 13.6 Hz, 1H, C5-*β*H), 3.67 (s, 3H, OCH<sub>3</sub>), 3.76 (dd, *J* = 13.6, 5.6 Hz, 1H, C4-H), 4.84 (s, 1H, C3-H), 5.46 (s, 1H, C1-H), 6.60 (s, 1H, Ar-H), 6.64 (d, *J* = 7.9 Hz, 1H, Ar-H), 6.84-6.88 (overlapped m, 1H, Ar-H), 6.86 (overlapped d, *J* = 15.1 Hz, 1H, C10-H), 7.04 (t, *J* = 7.4 Hz, 1H, Ar-H), 7.15-7.20 (m, 3H, Ar-H), 7.34-7.47 (m, 11H, Ar-H), 7.93 (d, *J* = 15.1 Hz, 1H, C9-H), 16.84 (s, 1H, C8-H); <sup>13</sup>C NMR (CDCl<sub>3</sub>, 125 MHz) δ 35.6, 37.0, 41.6, 55.3, 78.1, 91.0, 106.7, 112.8, 114.9, 116.9, 118.7, 119.2, 122.3, 122.9, 128.4 (× 2), 128.5 (× 2), 128.6, 129.1, 129.4, 129.9, 130.4 (× 2), 130.7, 135.1, 135.5, 137.6, 143.6, 151.6, 159.9, 180.6, 192.0; HRMS (ES<sup>+</sup>) *m/z*: [M+K]<sup>+</sup> calcd for C<sub>35</sub>H<sub>29</sub>NO<sub>6</sub>K, 598.1626; found 598.1627.

**(E)-1-(6-(3,4-Dimethoxyphenyl)-9-hydroxy-6a-nitro-7-phenyl-6a,7,8,10a-tetrahydro-6H-benzo[c]-chromen-10-yl)-3-phenylprop-2-en-1-one (3g).** White solid; Yield 87% (103 mg); petroleum ether:ethyl

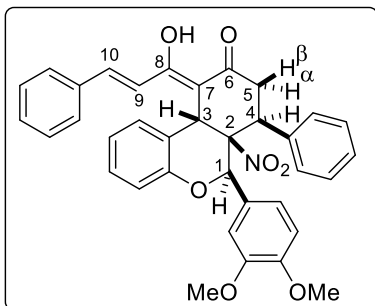

acetate (92:8), mp 226-229 °C; IR (KBr film) 3435 (m, br), 2937 (m), 1629 (s), 1581 (s), 1545 (vs), 1484 (s), 1451 (s), 1360 (m), 1275 (s), 1219 (s); <sup>1</sup>H NMR (CDCl<sub>3</sub>, 500 MHz) δ 2.72 (dd, *J* = 19.1, 5.1 Hz, 1H, C5-*α*H), 3.04 (dd, *J* = 19.1, 13.5 Hz, 1H, C5-*β*H), 3.64 (s, 3H, OCH<sub>3</sub>), 3.76 (dd, *J* = 13.5, 5.1 Hz, 1H, C4-H), 3.82 (s, 3H, OCH<sub>3</sub>), 4.83 (s, 1H, C3-H), 5.47 (s, 1H, C1-H), 6.55 (d, *J* = 1.6 Hz, 1H, Ar-H), 6.64 (dd, *J* = 8.5, 1.6 Hz, 1H, Ar-H), 6.73 (d, *J* = 8.5 Hz, 1H, Ar-H), 6.85 (d, *J* = 15.5 Hz, 1H, C10-H), 7.04 (t, *J* = 7.5 Hz, 1H, Ar-H), 7.19 (d, *J* = 7.5 Hz, 2H, Ar-H), 7.35-7.38 (m, 4H, Ar-H), 7.45-7.46 (unresolved, 7H, Ar-H), 7.95 (d, *J* = 15.5 Hz, 1H, C9-H),

16.89 (s, 1H, C8-H); <sup>13</sup>C NMR (CDCl<sub>3</sub>, 125 MHz) δ 35.7, 37.0, 41.6, 55.8, 55.9, 78.0, 91.2, 106.8, 109.9, 111.0, 116.9, 118.8, 119.7, 122.2, 122.9, 128.2, 128.4, 128.5, 128.6, 129.1, 129.3, 129.8, 130.3, 130.7, 135.1, 135.5, 143.6, 149.1, 149.9, 151.6, 180.5, 192.1; HRMS (ES<sup>+</sup>) *m/z*: [M+H]<sup>+</sup> calcd for C<sub>36</sub>H<sub>31</sub>NO<sub>7</sub>, 590.2139; found 590.2139.

**(E)-1-(9-Hydroxy-6a-nitro-6-phenyl-7-(p-tolyl)-6a,7,8,10a-tetrahydro-6H-benzo[c]chromen-10-yl)-3-(p-tolyl)prop-2-en-1-one (3i).** White solid; Yield 94% (105 mg); dr > 95:5, petroleum ether:ethyl

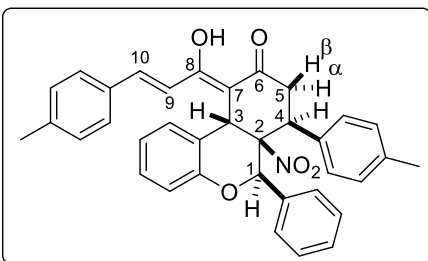

acetate (97:3), mp 192-193 °C; IR (Neat, cm<sup>-1</sup>) 3400 (w, br), 2922 (m), 1622 (s), 1581 (s), 1546 (vs), 1223 (m); <sup>1</sup>H NMR (CDCl<sub>3</sub>, 400 MHz) δ 2.38 (s, 3H, CH<sub>3</sub>), 2.42 (s, 3H, CH<sub>3</sub>), 2.69 (dd, *J* = 19.1, 5.4 Hz, 1H, C5-*α*H), 3.02 (dd, *J* = 19.1, 13.6 Hz, 1H, C5-*β*H), 3.72 (dd, *J* = 13.6, 5.4 Hz, 1H, C4-H), 4.77 (s, 1H, C3-H), 5.51 (s, 1H, C1-H), 6.78 (d, *J* = 15.4 Hz, 1H, C10-H), 7.03 (overlapped t, *J* = 8.0 Hz, 1H, Ar-H), 7.06 (overlapped d, *J* = 7.2 Hz, 2H, Ar-H), 7.16-7.20 (overlapped m, 2H, Ar-H), 7.18 (overlapped d, *J* = 8.2 Hz, 2H, Ar-H), 7.24-7.28 (m, 4H,

Ar-H), 7.31-7.38 (m, 6H, Ar-H), 7.91 (d, *J* = 15.4 Hz, 1H, C9-H), 16.96 (s, 1H, C8-H); <sup>13</sup>C NMR (CDCl<sub>3</sub>, 100 MHz) δ 21.4, 21.7, 35.4, 37.0, 41.3, 78.2, 91.1, 106.6, 116.8, 117.6, 122.2, 123.0, 126.9, 128.6, 128.8, 129.2, 129.5, 129.6, 129.8, 129.9, 130.2, 132.3, 132.4, 136.2, 138.4, 141.3, 143.8, 151.7, 181.1, 191.8; HRMS (ES<sup>+</sup>) *m/z*: [M+K]<sup>+</sup> calcd for C<sub>36</sub>H<sub>31</sub>NO<sub>5</sub>K, 596.1834; found 596.1833.

**(E)-3-(4-Chlorophenyl)-1-(7-(4-chlorophenyl)-9-hydroxy-6a-nitro-6-phenyl-6a,7,8,10a-tetrahydro-6H-benzo[c]chromen-10-yl)prop-2-en-1-one (3j).** White solid; Yield 83% (98 mg); petroleum ether:ethyl acetate (97:3), mp 196-198 °C; IR (Neat, cm<sup>-1</sup>) 3467 (m, br), 1623 (s), 1581 (s), 1545 (vs), 1491 (s), 1274 (m), 1224 (m); <sup>1</sup>H NMR (CDCl<sub>3</sub>, 400 MHz) δ 2.70 (dd, *J* = 18.9, 5.5 Hz, 1H, C5-*αH*), 2.99 (dd, *J* = 18.9, 13.6 Hz, 1H, C5-*βH*), 3.77 (dd, *J* = 13.6, 5.5 Hz, 1H, C4-*H*), 4.75 (s, 1H, C3-*H*), 5.45 (s, 1H, C1-*H*), 6.76 (d, *J* = 15.3 Hz, 1H, C10-*H*), 7.04-7.07 (overlapped m, 1H, *Ar-H*), 7.05 (overlapped t, *J* = 6.6 Hz, 2H, *Ar-H*), 7.13 (d, *J* = 7.8 Hz, 1H, *Ar-H*), 7.20 (d, *J* = 7.8 Hz, 1H, *Ar-H*), 7.27 (t, *J* = 7.4 Hz, 2H, *Ar-H*), 7.34-7.38 (m, 6H, *Ar-H*), 7.41 (ABq, *J* = 8.4 Hz, 4H, *Ar-H*), 7.87 (d, *J* = 15.3 Hz, 1H, C9-*H*), 16.82 (s, 1H, C8-*H*); <sup>13</sup>C NMR (CDCl<sub>3</sub>, 100 MHz) δ 35.4, 37.0, 41.0, 78.1, 90.9, 106.6, 116.9, 119.0, 122.4, 122.7, 126.7, 128.7, 128.9, 129.4, 129.5, 129.6, 129.8, 130.0, 131.7, 133.5, 133.9, 134.6, 135.8, 136.7, 142.4, 151.5, 180.3, 191.9; HRMS (ES<sup>+</sup>) *m/z*: [M+H]<sup>+</sup> calcd for C<sub>34</sub>H<sub>26</sub>Cl<sub>2</sub><sup>35</sup>NO<sub>5</sub>, 598.1183; found 598.1174.

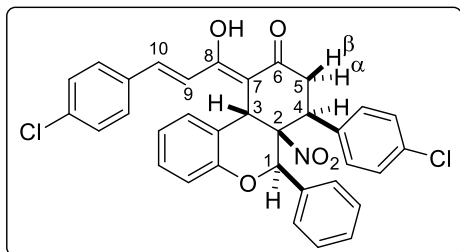

**(E)-1-(2-Chloro-9-hydroxy-6a-nitro-6,7-diphenyl-6a,7,8,10a-tetrahydro-6H-benzo[c]chromen-10-yl)-3-phenylprop-2-en-1-one (3h).** White solid; Yield 88% (99 mg); petroleum ether:ethyl acetate (97:3), mp 232-234 °C; IR (Neat, cm<sup>-1</sup>) 3441 (w, br), 2930 (w), 1627 (w), 1546 (m), 1264 (s); <sup>1</sup>H NMR (CDCl<sub>3</sub>, 400 MHz) δ 2.75 (dd, *J* = 19.2, 5.3 Hz, 1H, C5-*αH*), 3.06 (dd, *J* = 19.2, 13.7 Hz, 1H, C5-*βH*), 3.72 (dd, *J* = 13.7, 5.3 Hz, 1H, C4-*H*), 4.77 (s, 1H, C3-*H*), 5.51 (s, 1H, C1-*H*), 6.78 (d, *J* = 15.5 Hz, 1H, C10-*H*), 7.04 (d, *J* = 7.2 Hz, 2H, *Ar-H*), 7.12 (overlapped d, *J* = 1.2 Hz, 1H, *Ar-H*), 7.15 (d, *J* = 8.8 Hz, 1H, *Ar-H*), 7.29 (d, *J* = 7.6 Hz, 2H, *Ar-H*), 7.34 (overlapped dd, *J* = 8.8, 1.2 Hz, 1H, *Ar-H*), 7.33-7.35 (overlapped m, 1H, *Ar-H*), 7.39-7.47 (m, 10H, *Ar-H*), 7.97 (d, *J* = 15.5 Hz, 1H, C9-*H*), 16.91 (s, 1H, C8-*H*); <sup>13</sup>C NMR (CDCl<sub>3</sub>, 100 MHz) δ 35.5, 37.0, 41.7, 78.3, 90.8, 106.1, 118.0, 118.2, 124.8, 126.7, 127.4, 128.5, 128.6, 128.7, 128.9, 129.2, 129.9, 130.0, 130.3 (× 2), 130.9, 134.9, 135.2, 135.7, 144.4, 150.3, 180.6, 192.1; HRMS (ES<sup>+</sup>) *m/z*: [M+H]<sup>+</sup> calcd for C<sub>34</sub>H<sub>27</sub>ClNO<sub>5</sub>, 564.1572; found 564.1571.

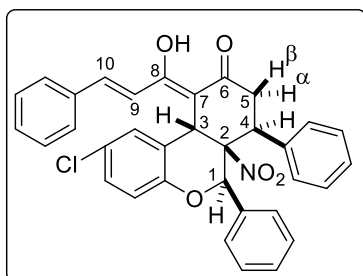

**(Z)-7-(Furan-2-yl)-10-((E)-3-(furan-2-yl)-1-hydroxyallylidene)-6a-nitro-6-phenyl-6a,7,8,10,10a-hexahydro-9H-benzo[c]chromen-9-one (3k).** White solid; Yield 60% (68 mg); petroleum ether:ethyl acetate (96:4), mp 184-186 °C; IR (Neat, cm<sup>-1</sup>) 3481 (vs, br), 1630 (s), 1610 (s), 1549 (s), 1513 (s), 1225 (s); <sup>1</sup>H NMR (CDCl<sub>3</sub>, 500 MHz) δ 2.70 (dd, *J* = 18.9, 5.2 Hz, 1H, C5-*αH*), 2.97 (dd, *J* = 18.9, 13.8 Hz, 1H, C5-*βH*), 3.70 (dd, *J* = 13.8, 5.2 Hz, 1H, C4-*H*), 4.75 (s, 1H, C3-*H*), 5.45 (s, 1H, C1-*H*), 6.72 (d, *J* = 15.4 Hz, 1H, C10-*H*), 7.04-7.07 (overlapped m, 1H, *Ar-H*), 7.05 (overlapped d, *J* = 7.5 Hz, 2H, *Ar-H*), 7.07 (overlapped t, *J* = 8.5 Hz, 2H, *Ar-H*), 7.14 (overlapped t, *J* = 8.5 Hz, 2H, *Ar-H*), 7.12-7.15 (overlapped m, 1H, *Ar-H*), 7.19 (d, *J* = 8.0 Hz, 1H, *Ar-H*), 7.27 (overlapped d, *J* = 7.5 Hz, 2H, *Ar-H*), 7.34 (d, *J* = 8.0 Hz, 1H, *Ar-H*), 7.38 (t, *J* = 8.0 Hz, 1H, *Ar-H*), 7.42-7.44 (m, 4H, *Ar-H*), 7.89 (d, *J* = 15.4 Hz, 1H, C9-*H*), 16.88 (s, 1H, C8-*H*); <sup>13</sup>C NMR (CDCl<sub>3</sub>, 100 MHz) δ 35.4, 37.1, 40.9, 78.1, 91.0, 106.6, 115.4 (d, *J* = 21.1 Hz), 116.4 (d, *J* = 21.5 Hz), 116.9, 118.2 (d, *J* = 1.8 Hz), 122.3, 122.8, 126.8, 128.9, 129.4, 129.8, 129.9, 130.4 (d, *J* = 8.5 Hz), 131.1 (d, *J* = 3.4 Hz), 131.3 (d, *J* = 3.1 Hz), 132.0 (d, *J* = 8.5 Hz), 135.9,

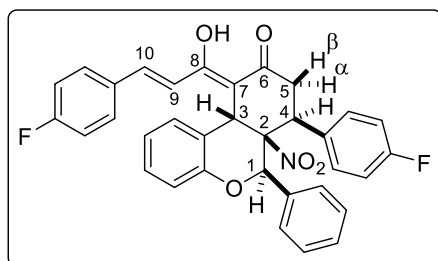

**(Z)-7-(Furan-2-yl)-10-((E)-3-(furan-2-yl)-1-hydroxyallylidene)-6a-nitro-6-phenyl-6a,7,8,10,10a-hexahydro-9H-benzo[c]chromen-9-one (3k).** White solid; Yield 60% (68 mg); petroleum ether:ethyl acetate (96:4), mp 184-186 °C; IR (Neat, cm<sup>-1</sup>) 3481 (vs, br), 1630 (s), 1610 (s), 1549 (s), 1513 (s), 1225 (s); <sup>1</sup>H NMR (CDCl<sub>3</sub>, 500 MHz) δ 2.70 (dd, *J* = 18.9, 5.2 Hz, 1H, C5-*αH*), 2.97 (dd, *J* = 18.9, 13.8 Hz, 1H, C5-*βH*), 3.70 (dd, *J* = 13.8, 5.2 Hz, 1H, C4-*H*), 4.75 (s, 1H, C3-*H*), 5.45 (s, 1H, C1-*H*), 6.72 (d, *J* = 15.4 Hz, 1H, C10-*H*), 7.04-7.07 (overlapped m, 1H, *Ar-H*), 7.05 (overlapped d, *J* = 7.5 Hz, 2H, *Ar-H*), 7.07 (overlapped t, *J* = 8.5 Hz, 2H, *Ar-H*), 7.14 (overlapped t, *J* = 8.5 Hz, 2H, *Ar-H*), 7.12-7.15 (overlapped m, 1H, *Ar-H*), 7.19 (d, *J* = 8.0 Hz, 1H, *Ar-H*), 7.27 (overlapped d, *J* = 7.5 Hz, 2H, *Ar-H*), 7.34 (d, *J* = 8.0 Hz, 1H, *Ar-H*), 7.38 (t, *J* = 8.0 Hz, 1H, *Ar-H*), 7.42-7.44 (m, 4H, *Ar-H*), 7.89 (d, *J* = 15.4 Hz, 1H, C9-*H*), 16.88 (s, 1H, C8-*H*); <sup>13</sup>C NMR (CDCl<sub>3</sub>, 100 MHz) δ 35.4, 37.1, 40.9, 78.1, 91.0, 106.6, 115.4 (d, *J* = 21.1 Hz), 116.4 (d, *J* = 21.5 Hz), 116.9, 118.2 (d, *J* = 1.8 Hz), 122.3, 122.8, 126.8, 128.9, 129.4, 129.8, 129.9, 130.4 (d, *J* = 8.5 Hz), 131.1 (d, *J* = 3.4 Hz), 131.3 (d, *J* = 3.1 Hz), 132.0 (d, *J* = 8.5 Hz), 135.9,

142.6, 151.5, 162.9 (d,  $J = 246.0$  Hz), 164.2 (d,  $J = 250.0$  Hz), 180.8, 191.7;  $^{19}\text{F}$  NMR (470 MHz,  $\text{CDCl}_3$ )  $\delta$  -113.5, -108.7; HRMS (ES+)  $m/z$ :  $[\text{M}]^+$  calcd for  $\text{C}_{34}\text{H}_{27}\text{F}_2\text{NO}_5$ , 567.1796; found 567.1796.

**(E)-3-(3-Chlorophenyl)-1-(7-(3-chlorophenyl)-9-hydroxy-6a-nitro-6-phenyl-6a,7,8,10a-tetrahydro-6H-benzo[*c*]chromen-10-yl)prop-2-en-1-one (3n).** White solid; Yield 94% (112 mg);

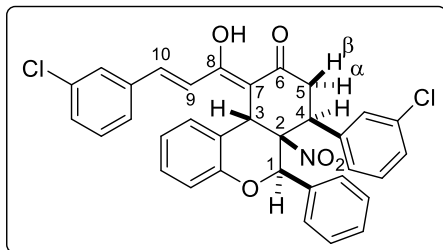

petroleum ether:ethyl acetate (97:3), mp 223-225 °C; IR (Neat,  $\text{cm}^{-1}$ ) 3386 (vs, br), 1630 (s), 1573 (s), 1547 (vs), 1223 (m);  $^1\text{H}$  NMR ( $\text{CDCl}_3$ , 400 MHz)  $\delta$  2.73 (dd,  $J = 19.1, 5.2$  Hz, 1H,  $C5-\alpha H$ ), 3.01 (dd,  $J = 19.1, 13.5$  Hz, 1H,  $C5-\beta H$ ), 3.77 (dd,  $J = 13.5, 5.2$  Hz, 1H,  $C4-H$ ), 4.79 (s, 1H,  $C3-H$ ), 5.52 (s, 1H,  $C1-H$ ), 6.81 (d,  $J = 15.2$  Hz, 1H,  $C10-H$ ), 7.08-7.14 (m, 4H,  $Ar-H$ ), 7.24-7.51 (m, 13H,  $Ar-H$ ), 7.85 (d,  $J = 15.2$ , 1H,  $C9-H$ ) 16.67 (s, 1H,  $C8-H$ );  $^{13}\text{C}$  NMR ( $\text{CDCl}_3$ , 100 MHz)  $\delta$  35.4, 36.9, 41.2, 78.1, 90.8, 106.7, 117.0,

119.8, 122.4, 122.6, 126.7, 126.9, 127.9, 128.6, 128.9, 129.0, 129.3, 129.7, 129.9, 130.1, 130.4, 130.5 ( $\times 2$ ), 134.4, 135.2, 135.8, 136.8, 137.5, 142.0, 151.5, 179.7, 192.1; HRMS (ES+)  $m/z$ :  $[\text{M}+\text{H}]^+$  calcd for  $\text{C}_{34}\text{H}_{26}\text{Cl}_2^{35}\text{NO}_5$ , 598.1183; found 598.1177.

**(E)-3-(4-Bromophenyl)-1-(7-(4-bromophenyl)-9-hydroxy-6a-nitro-6-phenyl-6a,7,8,10a-tetrahydro-6H-benzo[*c*]chromen-10-yl)prop-2-en-1-one (3o).** White solid; Yield 92% (126 mg);

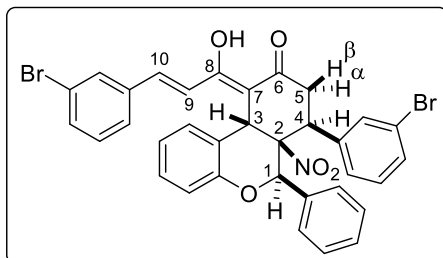

petroleum ether:ethyl acetate (97:3), mp 173-175 °C; IR (Neat,  $\text{cm}^{-1}$ ) 3477 (w, br), 1626 (s), 1582 (s), 1545 (vs), 1486 (s), 1450 (m), 1356 (w), 1223 (m);  $^1\text{H}$  NMR ( $\text{CDCl}_3$ , 400 MHz)  $\delta$  2.71 (dd,  $J = 19.0, 5.4$  Hz, 1H,  $C5-\alpha H$ ), 2.99 (dd,  $J = 19.0, 13.6$  Hz, 1H,  $C5-\beta H$ ), 3.73 (dd,  $J = 13.6, 5.4$  Hz, 1H,  $C4-H$ ), 4.76 (s, 1H,  $C3-H$ ), 5.49 (s, 1H,  $C1-H$ ), 6.77 (d,  $J = 15.6$  Hz, 1H,  $C10-H$ ), 7.06-7.08 (m, 3H,  $Ar-H$ ), 7.11 (t,  $J = 7.7$  Hz, 1H,  $Ar-H$ ), 7.23 (overlapped t,  $J = 7.7$  Hz, 1H,  $Ar-H$ ), 7.25-7.28 (m, 2H,  $Ar-H$ ), 7.31 (d,  $J = 8.4$  Hz, 2H,

$Ar-H$ ), 7.34-7.39 (m, 4H,  $Ar-H$ ), 7.50 (d,  $J = 7.7$  Hz, 1H,  $Ar-H$ ), 7.55 (overlapped s, 1H,  $Ar-H$ ), 7.56 (overlapped d,  $J = 7.7$  Hz, 1H,  $Ar-H$ ), 7.61 (s, 1H,  $Ar-H$ ), 7.81 (d,  $J = 15.6$  Hz, 1H,  $C9-H$ ), 16.62 (s, 1H,  $C8-H$ );  $^{13}\text{C}$  NMR ( $\text{CDCl}_3$ , 100 MHz)  $\delta$  35.5, 36.9, 41.2, 78.1, 90.8, 106.8, 117.0, 119.8, 122.4, 122.6 ( $\times 2$ ), 123.3, 126.7, 127.4, 129.0 ( $\times 2$ ), 129.3, 129.9, 130.1 ( $\times 2$ ), 130.7, 130.8, 131.8, 133.4 ( $\times 2$ ), 135.8, 137.1, 137.8, 141.8, 151.5, 179.6, 192.1; HRMS (ES+)  $m/z$ :  $[\text{M}+\text{H}]^+$  calcd for  $\text{C}_{34}\text{H}_{26}\text{Br}_2^{79}\text{NO}_5$ , 686.0172; found 686.0172.

**(E)-3-(3,4-Dimethoxyphenyl)-1-(7-(3,4-dimethoxyphenyl)-9-hydroxy-6a-nitro-6-phenyl-6a,7,8,10a-tetrahydro-6H-benzo[*c*]chromen-10-yl)prop-2-en-1-one (3p).** Yellow solid; Yield 96%

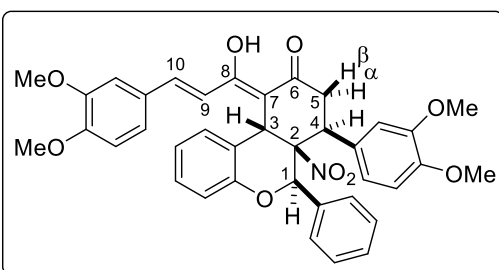

(124 mg); petroleum ether:ethyl acetate (85:15), mp 137-139 °C; IR (Neat,  $\text{cm}^{-1}$ ) 3463 (vs, br), 1622 (m), 1583 (m), 1542 (s), 1516 (s), 1264 (s);  $^1\text{H}$  NMR ( $\text{CDCl}_3$ , 400 MHz)  $\delta$  2.71 (dd,  $J = 19.0, 5.3$  Hz, 1H,  $C5-\alpha H$ ), 2.98 (dd,  $J = 19.0, 13.7$  Hz, 1H,  $C5-\beta H$ ), 3.72 (dd,  $J = 13.7, 5.3$  Hz, 1H,  $C4-H$ ), 3.87 (s, 3H,  $OCH_3$ ), 3.92 (s, 3H,  $OCH_3$ ), 3.93 (s, 3H,  $OCH_3$ ), 3.94 (s, 3H,  $OCH_3$ ), 4.74 (s, 1H,  $C3-H$ ), 5.54 (s, 1H,  $C1-H$ ), 6.66 (d,  $J = 15.3$  Hz, 1H,  $C10-H$ ), 6.87 (d,  $J = 8.5$  Hz, 1H,  $Ar-H$ ), 6.90 (overlapped s, 1H,  $Ar-H$ ), 6.93 (d,  $J = 8.5$  Hz, 1H,  $Ar-H$ ), 6.98-

7.01 (unresolved m, 2H,  $Ar-H$ ), 7.04-7.10 (m, 4H,  $Ar-H$ ), 7.15 (overlapped d,  $J = 8.5$  Hz, 1H,  $Ar-H$ ),

7.17 (overlapped d,  $J = 8.5$  Hz, 1H, *Ar-H*), 7.23 (t,  $J = 7.7$  Hz, 2H, *Ar-H*), 7.31 (d,  $J = 7.5$  Hz, 1H, *Ar-H*), 7.36 (t,  $J = 7.5$  Hz, 1H, *Ar-H*), 7.88 (d,  $J = 15.3$  Hz, 1H, *C9-H*), 16.97 (s, 1H, *C8-H*);  $^{13}\text{C}$  NMR ( $\text{CDCl}_3$ , 100 MHz)  $\delta$  35.4, 37.1, 41.3, 55.9, 56.0, 56.0, 56.2, 78.1, 91.1, 106.4, 110.1, 110.8, 111.3, 113.4, 116.3, 116.6, 122.2, 122.7, 123.2, 123.3, 126.9, 127.7, 128.0, 128.8, 129.5, 129.7, 129.8, 136.2, 143.8, 148.5, 149.2, 149.4, 151.6, 151.7, 181.2, 191.3; HRMS (ES+)  $m/z$ :  $[\text{M}+\text{Na}]^+$  calcd for  $\text{C}_{38}\text{H}_{35}\text{NO}_9\text{Na}$ , 672.2204; found 672.2206.

**(Z)-10-((E)-1-Hydroxy-3-(thiophen-2-yl)allylidene)-6a-nitro-6-phenyl-7-(thiophen-2-yl)-6,6a,7,8,10a-hexahydro-9H-benzo[c]chromen-9-one (3q).** Yellow solid; Yield 69% (74 mg);

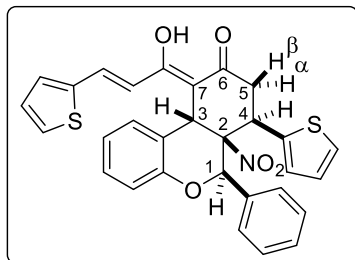

petroleum ether:ethyl acetate (95:5), mp 117-119 °C; IR (KBr film) 3434 (m, br), 2922 (w), 1614 (s), 1581 (m), 1544 (vs), 1450 (m), 1409 (m), 1223 (m);  $^1\text{H}$  NMR ( $\text{CDCl}_3$ , 400 MHz)  $\delta$  2.86, 2.97 (ABq,  $J = 19.2$  Hz, the lower half and upper half are further split into d with  $J = 13.2$  and 5.9 Hz, 2H, *C5-H*), 4.06 (dd,  $J = 13.2, 5.9$  Hz, 1H, *C4-H*), 4.73 (s, 1H, *C3-H*), 5.73 (s, 1H, *C1-H*), 6.59 (d,  $J = 14.8$  Hz, 1H, *C10-H*), 7.04 (overlapped t,  $J = 7.6$  Hz, 1H, *Ar-H*), 7.06-7.08 (m, 3H, *Ar-H*), 7.09-7.12 (m, 1H, *Ar-H*), 7.14 (d,  $J = 6.5$  Hz, 1H, *Ar-H*), 7.17-7.20 (m, 2H, *Ar-H*),

7.27-7.31 (m, 3H, *Ar-H*), 7.34 (overlapped d,  $J = 7.6$  Hz, 1H, *Ar-H*), 7.36 (overlapped t,  $J = 7.6$  Hz, 1H, *Ar-H*), 7.41 (t,  $J = 4.2$  Hz, 2H, *Ar-H*), 8.01 (d,  $J = 14.8$  Hz, 1H, *C9-H*), 16.89 (s, 1H, *C8-H*);  $^{13}\text{C}$  NMR ( $\text{CDCl}_3$ , 100 MHz)  $\delta$  35.4, 38.0, 38.7, 78.3, 91.0, 106.1, 116.9, 117.5, 122.3, 123.0, 126.5, 126.7, 126.8, 128.7, 128.9, 129.0, 129.3, 129.5, 129.7, 129.8, 131.9, 135.9, 136.5, 138.7, 140.6, 151.8, 181.4, 190.3; HRMS (ES+)  $m/z$ :  $[\text{M}+\text{H}]^+$  calcd for  $\text{C}_{30}\text{H}_{24}\text{NO}_5\text{S}_2$ , 542.1090; found 542.1095.

**General procedure for the synthesis of racemic triple Michael adducts or hexahydro-1H, 6H-chromeno[6,5-c]chromenone (4).** To a stirred solution of curcumin **1** (0.3 mmol, 1.0 equiv) and nitrochromene **2** (0.3 mmol, 1.2 equiv) in DCM (3.0 mL), DBU (3.0 equiv) was added at room temperature. After completion of the reaction (3-4 d, monitored by TLC), the solvent was evaporated under vacuum. The crude residue was washed with water (3  $\times$  5 mL), and extracted with ethyl acetate (3  $\times$  5 mL). The organic phase was separated and washed with brine (10 mL), dried over  $\text{Na}_2\text{SO}_4$  and concentrated in *vacuo*. The crude residue was purified by silica gel column chromatography by eluting with petroleum ether/ethyl acetate to isolate pure triple Michael adduct **4**.

**6a-Nitro-3,6,7-triphenyl-2,3,5,6a,7,12b-hexahydro-1H,6H-chromeno[6,5-c]chromen-1-one (4b).**

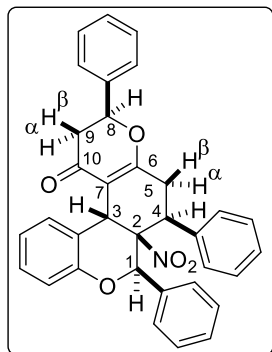

White solid; Yield 81% (128 mg); petroleum ether:ethyl acetate (96:4), mp 256-258 °C; IR (Neat,  $\text{cm}^{-1}$ ) 3461 (vs, br), 1664 (m), 1614 (s), 1583 (m), 1542 (m), 1451 (m), 1225 (m);  $^1\text{H}$  NMR ( $\text{CDCl}_3$ , 400 MHz)  $\delta$  2.60 (dd,  $J = 18.8, 5.2$  Hz, 1H, *C5- $\alpha$ H*), 2.86, 2.97 (ABq,  $J = 17.2$  Hz, the lower and upper half are further split into d with  $J = 13.7$  and 3.9 Hz, 2H, *C9-H*), 3.06 (dd,  $J = 18.8, 13.2$  Hz, 1H, *C5- $\beta$ H*), 3.81 (dd,  $J = 13.2, 5.2$  Hz, 1H, *C4-H*), 4.88 (s, 1H, *C3-H*), 5.44 (s, 1H, *C1-H*), 5.45 (dd,  $J = 13.7, 3.9$  Hz, 1H, *C8-H*), 7.00 (d,  $J = 7.5$  Hz, 2H, *Ar-H*), 7.08 (t,  $J = 7.8$  Hz, 1H, *Ar-H*), 7.13 (d,  $J = 7.8$  Hz, 1H, *Ar-H*), 7.19 (t,  $J = 7.5$  Hz, 2H, *Ar-H*), 7.24-7.29 (m, 2H, *Ar-H*), 7.33 (t,  $J = 7.8$  Hz, 1H, *Ar-H*), 7.42-7.45 (m, 10H, *Ar-H*);  $^{13}\text{C}$  NMR ( $\text{CDCl}_3$ , 100 MHz)  $\delta$  31.8, 33.0, 42.4, 42.8, 77.7, 80.2, 90.6, 113.3, 116.7, 122.2, 123.9, 126.5, 127.2, 128.4, 128.7, 128.9, 129.1

( $\times 2$ ), 129.3 ( $\times 2$ ), 129.8, 130.3, 135.5, 135.6, 137.7, 150.8, 170.0, 191.4; HRMS (ES+)  $m/z$ :  $[\text{M}+\text{Na}]^+$  calcd for  $\text{C}_{34}\text{H}_{27}\text{NO}_5\text{Na}$ , 552.1781; found 552.1782.

**7-(4-Chlorophenyl)-6a-nitro-3,6-diphenyl-2,3,5,6a,7,12b-hexahydro-1H,6H-chromeno[6,5-c]chromen-1-one (4d).**

White solid; Yield 78% (132 mg); petroleum ether:ethyl acetate (92:8), mp 226-228 °C; IR (Neat,  $\text{cm}^{-1}$ ) 3324 (m, br), 1667 (s), 1615 (vs), 1544 (s), 1474 (m), 1416 (s), 1356 (w), 1227 (s);  $^1\text{H}$  NMR ( $\text{CDCl}_3$ , 400 MHz)  $\delta$  2.60 (dd,  $J = 18.8, 5.3$  Hz, 1H,  $C5-\alpha H$ ), 2.86, 2.98 (ABq,  $J = 17.1$  Hz, the lower and upper half are further split into d with  $J = 14.7$  and 3.8 Hz, 2H,  $C9-H$ ), 3.05 (dd,  $J = 18.8, 13.0$  Hz, 1H,  $C5-\beta H$ ), 3.79 (dd,  $J = 13.0, 5.3$  Hz, 1H,  $C4-H$ ), 4.82 (s, 1H,  $C3-H$ ), 5.42 (s, 1H,  $C1-H$ ), 5.44 (dd,  $J = 14.7, 3.8$  Hz, 1H,  $C8-H$ ), 6.94 (d,  $J = 8.5$  Hz, 2H,  $Ar-H$ ), 7.08 (overlapped t,  $J = 7.7$  Hz, 1H,  $Ar-H$ ), 7.12 (overlapped d,  $J = 7.7$  Hz, 1H,  $Ar-H$ ), 7.16 (d,  $J = 8.5$  Hz, 2H,  $Ar-H$ ), 7.28 (d,  $J = 7.7$  Hz, 1H,  $Ar-H$ ), 7.33 (t,  $J = 7.7$  Hz, 1H,  $Ar-H$ ), 7.39-7.44 (unresolved m, 10H,  $Ar-H$ ); Confirmed by  $^1\text{H}-^1\text{H}$  COSY;  $^{13}\text{C}$  NMR ( $\text{CDCl}_3$ , 100 MHz)  $\delta$  31.8, 32.9, 42.4, 42.8, 77.1, 80.2, 90.4, 113.2, 116.7, 122.5, 123.7, 126.5, 128.5, 128.7, 128.8, 129.1 ( $\times 2$ ), 129.3 ( $\times 2$ ), 129.9, 130.3, 134.1, 135.3, 135.4, 137.6, 150.5, 170.0, 191.4; HRMS (ES $^+$ )  $m/z$ :  $[\text{M}+\text{Na}]^+$  calcd for  $\text{C}_{34}\text{H}_{26}\text{ClNO}_5\text{Na}$ , 586.1388; found 586.1388.

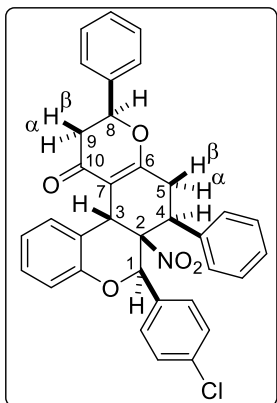

**6a-Nitro-7-Phenyl-3,6-di-p-tolyl-2,3,5,6a,7,12b-hexahydro-1H,6H-chromeno[6,5-c]chromen-1-one (4i).**

White solid; Yield 88% (147 mg); petroleum ether:ethyl acetate (96:4), mp 217-219 °C; IR (Neat,  $\text{cm}^{-1}$ ) 3419 (vs, br), 1667 (m), 1640 (m), 1620 (m), 1542 (w);  $^1\text{H}$  NMR ( $\text{CDCl}_3$ , 400 MHz)  $\delta$  2.38 (s, 3H,  $\text{CH}_3$ ), 2.42 (s, 3H,  $\text{CH}_3$ ), 2.57 (dd,  $J = 18.8, 5.4$  Hz, 1H,  $C5-\alpha H$ ), 2.83, 2.98 (ABq,  $J = 17.2$  Hz, the lower and upper half are further split into d with  $J = 14.4$  and 3.1 Hz, 2H,  $C9-H$ ), 3.04 (dd,  $J = 18.8, 13.1$  Hz, 1H,  $C5-\beta H$ ), 3.78 (dd,  $J = 13.1, 5.4$  Hz, 1H,  $C4-H$ ), 4.88 (s, 1H,  $C3-H$ ), 5.41 (dd,  $J = 14.4, 3.1$  Hz, 1H,  $C8-H$ ), 5.46 (s, 1H,  $C1-H$ ), 7.01 (d,  $J = 7.5$  Hz, 2H,  $Ar-H$ ), 7.08 (t,  $J = 8.3$  Hz, 1H,  $Ar-H$ ), 7.13 (d,  $J = 8.3$  Hz, 1H,  $Ar-H$ ), 7.19 (t,  $J = 7.5$  Hz, 2H,  $Ar-H$ ), 7.24-7.28 (m, 5H,  $Ar-H$ ), 7.28 (d,  $J = 8.3$  Hz, 1H,  $Ar-H$ ), 7.31-7.36 (m, 5H,  $Ar-H$ );  $^{13}\text{C}$  NMR ( $\text{CDCl}_3$ , 100 MHz)  $\delta$  21.3, 21.4, 31.9, 32.9, 42.1, 42.7, 77.7, 80.1, 90.6, 113.2, 116.6, 122.1, 123.9, 126.6, 127.3, 128.9, 129.1, 129.2, 129.3, 129.7, 129.8, 130.1, 132.5, 134.7, 135.7, 138.5, 139.3, 150.8, 170.2, 191.6; HRMS (ES $^+$ )  $m/z$ :  $[\text{M}+\text{H}]^+$  calcd for  $\text{C}_{36}\text{H}_{31}\text{NO}_5$ , 580.2098; found 580.2098.

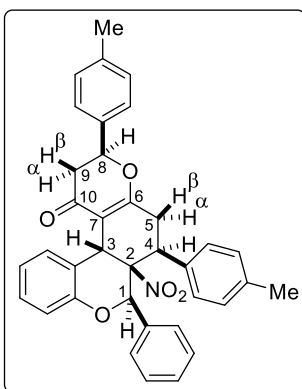

**3,6-Bis(4-chlorophenyl)-6a-nitro-7-phenyl-2,3,5,6a,7,12b-hexahydro-1H,6H-chromeno[6,5-c]chromen-1-one (4j).**

White solid; Yield 77% (138 mg); petroleum ether:ethyl acetate (92:8), mp 250-252 °C; IR (Neat,  $\text{cm}^{-1}$ ) 3505 (w), 1669 (s), 1620 (vs), 1544 (m), 1420 (m), 1275 (m), 1224 (s);  $^1\text{H}$  NMR ( $\text{CDCl}_3$ , 400 MHz)  $\delta$  2.57 (dd,  $J = 18.3, 4.7$  Hz, 1H,  $C5-\alpha H$ ), 2.83, 2.97 (ABq,  $J = 17.1$  Hz, the lower and upper half are further split into d with  $J = 14.6$  and 3.2 Hz, 2H,  $C9-H$ ), 3.00 (dd,  $J = 18.3, 12.9$  Hz, 1H,  $C5-\beta H$ ), 3.78 (dd,  $J = 12.9, 4.7$  Hz, 1H,  $C4-H$ ), 4.87 (s, 1H,  $C3-H$ ), 5.39 (s, 1H,  $C1-H$ ), 5.41 (overlapped dd,  $J = 14.6, 3.2$  Hz, 1H,  $C8-H$ ), 6.99 (d,  $J = 7.2$  Hz, 2H,  $Ar-H$ ), 7.08 (t,  $J = 7.8$  Hz, 1H,  $Ar-H$ ), 7.12 (d,  $J = 7.8$  Hz, 1H,  $Ar-H$ ), 7.19-7.26 (unresolved m, 4H,  $Ar-H$ ), 7.31-7.41 (unresolved m, 9H,  $Ar-H$ );  $^{13}\text{C}$  NMR ( $\text{CDCl}_3$ , 100 MHz)  $\delta$  31.7, 32.9, 41.9, 42.7, 77.7, 79.5, 90.4, 113.4, 116.7, 122.3, 123.6, 127.1, 127.8, 128.7, 129.0, 129.3 ( $\times 2$ ), 129.4, 129.8, 131.7, 134.0, 134.7, 135.2, 135.3, 136.1, 150.6, 169.4, 190.9; HRMS (ES $^+$ )  $m/z$ :  $[\text{M}+\text{H}]^+$  calcd for  $\text{C}_{34}\text{H}_{26}\text{Cl}_2^{35}\text{NO}_5$ , 598.1182, found 598.1183.

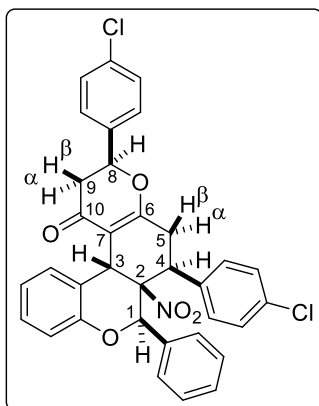



**7-(4-Methoxyphenyl)-6a-nitro-3,6-diphenyl-2,3,5,6a,7,12b-hexahydro-1H,6H-chromeno[6,5-c]chromen-1-one (4u).**

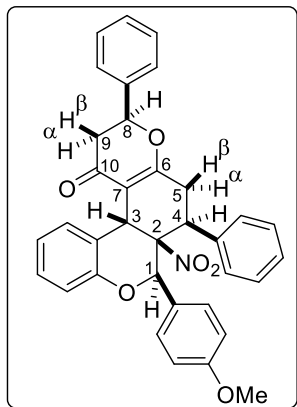

White solid; Yield 80% (134 mg); petroleum ether:ethyl acetate (85:15), mp 230-232 °C; IR (Neat,  $\text{cm}^{-1}$ ) 3421 (vs, br), 1642 (s), 1613 (s), 1542 (m), 1513 (w), 1288 (w), 1253 (m);  $^1\text{H}$  NMR ( $\text{CDCl}_3$ , 400 MHz)  $\delta$  2.59 (dd,  $J = 18.9, 5.5$  Hz, 1H,  $C5-\alpha H$ ), 2.86, 2.98 (ABq,  $J = 17.2$  Hz, the lower and upper half are further split into d with  $J = 14.6$  and 3.3 Hz, 2H,  $C9-H$ ), 3.05 (dd,  $J = 18.9, 13.1$  Hz, 1H,  $C5-\beta H$ ), 3.71 (s, 3H,  $OCH_3$ ), 3.79 (dd,  $J = 13.2, 5.5$  Hz, 1H,  $C4-H$ ), 4.89 (s, 1H,  $C3-H$ ), 5.39 (s, 1H,  $C1-H$ ), 5.45 (dd,  $J = 14.6, 3.3$  Hz, 1H,  $C8-H$ ), 6.70 (d,  $J = 8.8$  Hz, 2H,  $Ar-H$ ), 6.93 (d,  $J = 8.8$  Hz, 2H,  $Ar-H$ ), 7.08 (t,  $J = 8.5$  Hz, 1H,  $Ar-H$ ), 7.11 (d,  $J = 8.5$  Hz, 1H,  $Ar-H$ ), 7.28 (d,  $J = 8.5$  Hz, 1H,  $Ar-H$ ), 7.32 (t,  $J = 8.5$  Hz, 1H,  $Ar-H$ ), 7.39-7.44 (m, 10H,  $Ar-H$ );  $^{13}\text{C}$  NMR ( $\text{CDCl}_3$ , 100 MHz)  $\delta$  31.9, 32.9, 42.4, 42.8, 55.3, 77.4, 80.2, 90.7, 113.4, 114.2 ( $\times 2$ ), 116.7, 122.1, 123.8, 126.5, 127.5, 128.4, 128.7, 129.1 ( $\times 2$ ), 129.3, 129.8, 130.3, 135.6, 137.7, 150.8, 160.2, 170.0, 191.4; HRMS (ES+)  $m/z$ :  $[M+H]^+$  calcd for  $\text{C}_{35}\text{H}_{30}\text{NO}_6$ , 560.2068; found

560.2069.

**3,6-Bis(4-bromophenyl)-6a-nitro-7-phenyl-2,3,5,6a,7,12b-hexahydro-1H,6H-chromeno[6,5-c]chromen-1-one (4v).**

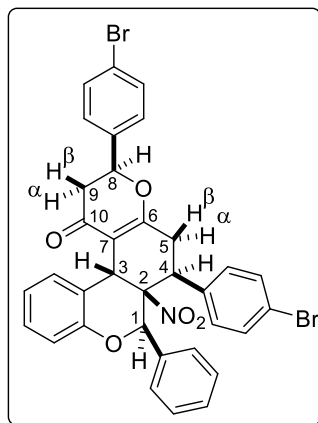

White solid; Yield 78% (132 mg); petroleum ether:ethyl acetate (92:8), mp 265-266 °C; IR (Neat,  $\text{cm}^{-1}$ ) 3490 (s, br), 1657 (s), 1611 (vs), 1583 (s), 1544 (m), 1484 (m), 1360 (w), 1224 (s);  $^1\text{H}$  NMR ( $\text{CDCl}_3$ , 400 MHz)  $\delta$  2.57 (dd,  $J = 18.9, 5.4$  Hz, 1H,  $C5-\alpha H$ ), 2.83, 2.90 (ABq,  $J = 17.2$  Hz, the lower and upper half are further split into d with  $J = 14.2$  and 3.9 Hz, 2H,  $C9-H$ ), 2.99 (dd,  $J = 18.9, 13.2$  Hz, 1H,  $C5-\beta H$ ), 3.76 (dd,  $J = 13.2, 5.4$  Hz, 1H,  $C4-H$ ), 4.86 (s, 1H,  $C3-H$ ), 5.39 (s, 1H,  $C1-H$ ), 5.41 (dd,  $J = 14.2, 3.9$  Hz, 1H,  $C8-H$ ), 6.99 (d,  $J = 7.5$  Hz, 2H,  $Ar-H$ ), 7.08 (t,  $J = 7.4$  Hz, 1H,  $Ar-H$ ), 7.12 (d,  $J = 7.4$  Hz, 1H,  $Ar-H$ ), 7.20 (overlapped t,  $J = 7.5$  Hz, 2H,  $Ar-H$ ), 7.22 (overlapped m, 1H,  $Ar-H$ ), 7.23-7.27 (m, 2H,  $Ar-H$ ), 7.29 (d,  $J = 7.4$  Hz, 1H,  $Ar-H$ ), 7.33 (t,  $J = 7.4$  Hz, 1H,  $Ar-H$ ), 7.34 (d,  $J = 8.4$  Hz, 2H,  $Ar-H$ ), 7.55-7.58 (m, 4H,  $Ar-H$ );  $^{13}\text{C}$  NMR ( $\text{CDCl}_3$ , 100 MHz)  $\delta$  31.7, 32.9, 42.0, 42.7, 77.7, 79.5, 90.4, 113.5, 116.7, 122.4, 123.0, 123.3, 123.6, 127.1, 128.1, 129.0, 129.3, 129.5, 129.8, 131.6, 132.0, 132.3, 134.5, 135.2, 136.6, 150.6, 169.4, 190.9; HRMS (ES+)  $m/z$ :  $[M+H]^+$  calcd for  $\text{C}_{34}\text{H}_{26}\text{Br}_2^{81}\text{NO}_5$ , 688.0156; found 688.0156.

**11-Bromo-6a-nitro-3,6,7-triphenyl-2,3,5,6a,7,12b-hexahydro-1H,6H-chromeno[6,5-c]chromen-1-one (4w).**

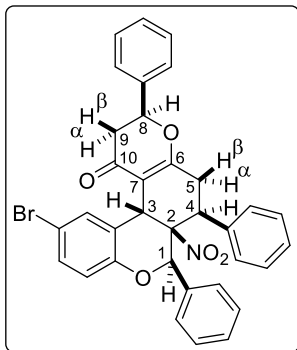

White solid; Yield 71% (129 mg); petroleum ether:ethyl acetate (92:8), mp 145-147 °C; IR (Neat,  $\text{cm}^{-1}$ ) 3437 (vs, br), 1668 (s), 1617 (vs), 1543 (s), 1473 (m), 1413 (m), 1354 (w), 1226 (m);  $^1\text{H}$  NMR ( $\text{CDCl}_3$ , 400 MHz)  $\delta$  2.52 (dd,  $J = 18.9, 5.4$  Hz, 1H,  $C5-\alpha H$ ), 2.76, 2.97 (ABq,  $J = 17.4$  Hz, the lower and upper half are further split into d with  $J = 14.3$  and 4.0 Hz, 2H,  $C9-H$ ), 2.95 (dd,  $J = 18.9, 13.1$  Hz, 1H,  $C5-\beta H$ ), 3.63 (dd,  $J = 13.1, 5.4$  Hz, 1H,  $C4-H$ ), 4.75 (s, 1H,  $C3-H$ ), 5.32 (s, 1H,  $C1-H$ ), 5.37 (dd,  $J = 14.3, 4.0$  Hz, 1H,  $C8-H$ ), 6.87 (d,  $J = 7.5$  Hz, 2H,  $Ar-H$ ), 6.91 (d,  $J = 8.6$  Hz, 1H,  $Ar-H$ ), 7.10 (t,  $J = 7.5$  Hz, 2H,  $Ar-H$ ), 7.14-7.18 (m, 1H,  $Ar-H$ ), 7.26-7.33 (unresolved m, 12H,  $Ar-H$ );  $^{13}\text{C}$  NMR ( $\text{CDCl}_3$ , 125 MHz)  $\delta$  31.8, 33.0, 42.6, 42.6, 77.9, 80.2, 90.2, 112.6, 114.6, 118.4, 126.1, 126.5,

127.1, 128.5, 128.8, 129.0, 129.1, 129.3, 129.5, 130.3, 132.3, 132.5, 135.1, 135.2, 137.5, 150.1, 170.3, 191.3; HRMS (ES+)  $m/z$ :  $[M+H]^+$  calcd for  $C_{34}H_{26}BrO_5$ , 632.0865; found 632.0865.

**Procedure for the asymmetric synthesis of double Michael adducts or tetrahydro-benzo[*c*]chromenes (3b).** To a stirred solution of curcumin **1b** (0.2 mmol, 1.0 equiv) and nitrochromene **2b** (0.2 mmol, 1.2 equiv) in dry DCM (3.0 mL), organocatalyst **C1** (10 mol%) was added under  $N_2$  at room temperature. After completion of the reaction (4 d, monitored by TLC), the solvent was evaporated under vacuum, and the crude residue was purified by silica gel column chromatography by eluting with petroleum ether/ethyl acetate (97:3).

**(*E*)-1-(9-Hydroxy-6a-nitro-6,7-diphenyl-6a,7,8,10a-tetrahydro-6*H*-benzo[*c*]chromen-10-yl)-3-phenylprop-2-en-1-one (3b):** Yield 41% (22 mg),  $[\alpha]_D^{25} = +1.780^\circ$  ( $c = 1.0$  in  $CH_2Cl_2$ ); HPLC: Chiralpak ADH (pet ether/*i*-PrOH = 97/3, flow rate = 1 mL/min,  $\lambda = 360$  nm),  $t_R$  (major) = 7.4 min,  $t_R$  (minor) = 22.0 min; 33% *ee*.

**3-Nitro-2-phenyl-2*H*-chromene (2b')**: Isolated 50% (16 mg),  $[\alpha]_D^{25} = +0.510^\circ$  ( $c = 1.0$  in  $CH_2Cl_2$ ); HPLC: Chiralpak IC (pet ether/*i*-PrOH = 98/2, flow rate = 1 mL/min,  $\lambda = 360$  nm),  $t_R$  (minor) = 12.0 min,  $t_R$  (major) = 12.8 min; 47% *ee*.

#### $^1H$ NMR and $^{13}C$ NMR chemical shift tables

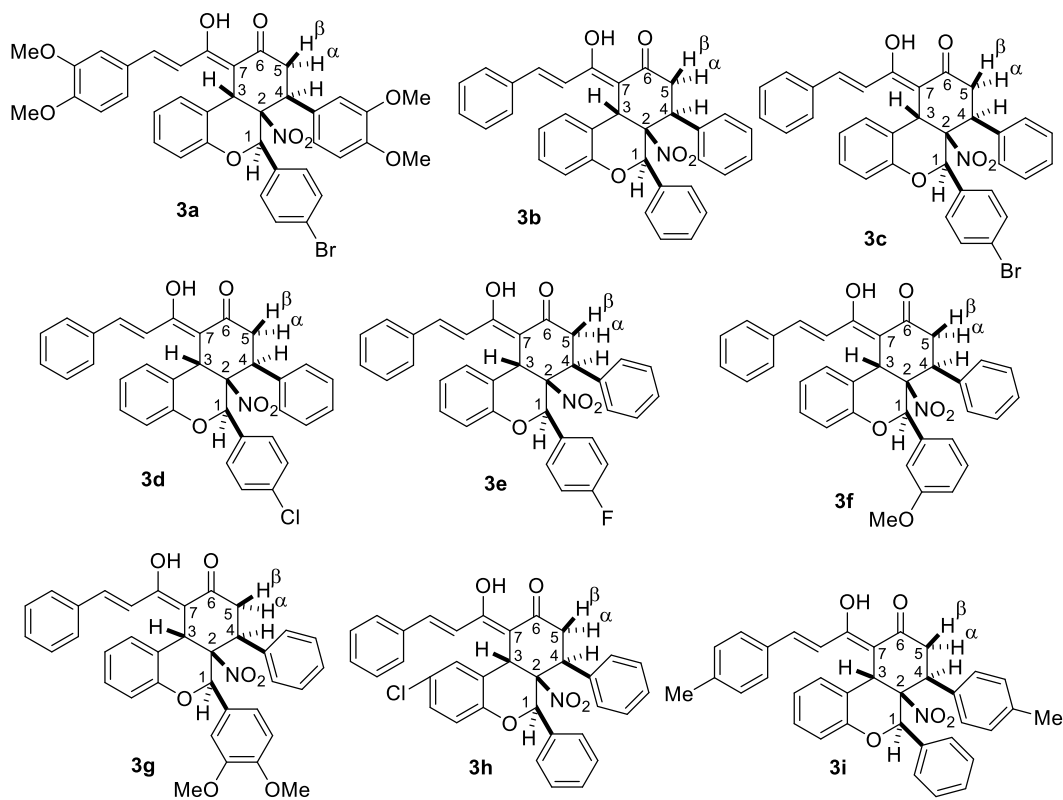

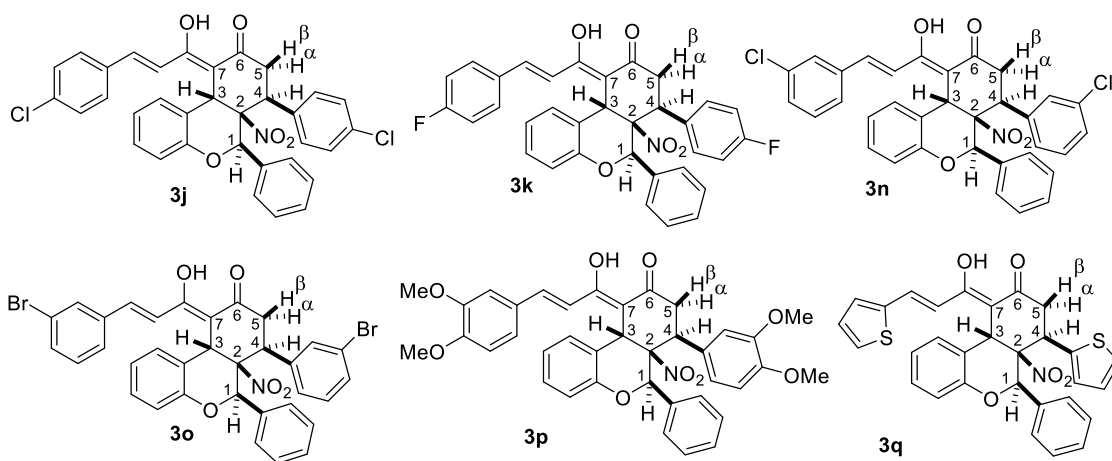

**Table S1. Selected  $^1\text{H}$  NMR chemical shift (in ppm) values for double Michael adducts**

| Entry     | C1-H          | C3-H          | C4-H                               | C5- $\beta$ H                        | C5- $\alpha$ H                      |
|-----------|---------------|---------------|------------------------------------|--------------------------------------|-------------------------------------|
| <b>3a</b> | 5.51 (s, 1H)  | 4.65 (s, 1H)  | 3.70 (dd, $J = 13.7$ , 5.4 Hz, 1H) | 2.97 (dd, $J = 19.0$ , 13.7 Hz, 1H)  | 2.70 (dd, $J = 19.0$ , 5.4 Hz, 1H)  |
| <b>3b</b> | 5.51 (s, 1H)  | 4.80 (s, 1H)  | 3.77 (dd, $J = 13.7$ , 5.4 Hz, 1H) | 3.06 (dd, $J = 19.0$ , 13.7 Hz, 1H)  | 2.72 (dd, $J = 19.0$ , 5.4 Hz, 1H)  |
| <b>3c</b> | 5.56 (s, 1H)  | 4.81 (s, 1H)  | 3.84 (dd, $J = 13.6$ , 5.3 Hz, 1H) | 3.14 (dd, $J = 19.1$ , 13.6 Hz, 1H)  | 2.81 (dd, $J = 19.1$ , 5.3 Hz, 1H)  |
| <b>3d</b> | 5.57 (s, 1H)  | 4.81 (s, 1H)  | 3.83 (dd, $J = 13.6$ , 5.2 Hz, 1H) | 3.14 (dd, $J = 19.1$ , 13.6 Hz, 1H)  | 2.81 (dd, $J = 19.1$ , 5.2 Hz, 1H)  |
| <b>3e</b> | 5.49 (s, 1H)  | 4.74 (s, 1H)  | 3.75 (dd, $J = 13.7$ , 5.4 Hz, 1H) | 3.05 (dd, $J = 19.1$ , 13.7 Hz, 1H)  | 2.72 (dd, $J = 19.1$ , 5.4 Hz, 1H)  |
| <b>3f</b> | 5.46 (s, 1H)  | 4.84 (s, 1H)  | 3.76 (dd, $J = 13.6$ , 5.6 Hz, 1H) | 3.04 (dd, $J = 19.1$ , 13.6 Hz, 1H)  | 2.71 (dd, $J = 19.1$ , 5.6 Hz, 1H), |
| <b>3g</b> | 5.47 (s, 1H)  | 4.83 (s, 1H)  | 3.76 (dd, $J = 13.5$ , 5.1 Hz, 1H) | 3.04 (dd, $J = 19.1$ , 13.5 Hz, 1H)  | 2.72 (dd, $J = 19.1$ , 5.1 Hz, 1H)  |
| <b>3h</b> | 5.51 (s, 1H), | 4.77 (s, 1H), | 3.72 (dd, $J = 13.7$ , 5.3 Hz, 1H) | 3.06 (dd, $J = 19.2$ , 13.7 Hz, 1H), | 2.75 (dd, $J = 19.2$ , 5.3 Hz, 1H)  |
| <b>3i</b> | 5.51 (s, 1H)  | 4.77 (s, 1H)  | 3.72 (dd, $J = 13.6$ , 5.4 Hz, 1H) | 3.02 (dd, $J = 19.1$ , 13.6 Hz, 1H)  | 2.69 (dd, $J = 19.1$ , 5.4 Hz, 1H)  |
| <b>3j</b> | 5.45 (s, 1H)  | 4.75 (s, 1H)  | 3.77 (dd, $J = 13.6$ , 5.5 Hz, 1H) | 2.99 (dd, $J = 18.9$ , 13.6 Hz, 1H)  | 2.70 (dd, $J = 18.9$ , 5.5 Hz, 1H)  |
| <b>3k</b> | 5.45 (s, 1H)  | 4.75 (s, 1H)  | 3.70 (dd, $J = 13.8$ , 5.2 Hz, 1H) | 2.97 (dd, $J = 18.9$ , 13.8 Hz, 1H)  | 2.70 (dd, $J = 18.9$ , 5.2 Hz, 1H)  |

|           |              |              |                                    |                                                                                                                        |                                    |
|-----------|--------------|--------------|------------------------------------|------------------------------------------------------------------------------------------------------------------------|------------------------------------|
| <b>3n</b> | 5.52 (s, 1H) | 4.79 (s, 1H) | 3.77 (dd, $J = 13.5$ , 5.2 Hz, 1H) | 3.01 (dd, $J = 19.1$ , 13.5 Hz, 1H)                                                                                    | 2.73 (dd, $J = 19.1$ , 5.2 Hz, 1H) |
| <b>3o</b> | 5.49 (s, 1H) | 4.76 (s, 1H) | 3.73 (dd, $J = 13.6$ , 5.4 Hz, 1H) | 2.99 (dd, $J = 19.0$ , 13.6 Hz, 1H)                                                                                    | 2.71 (dd, $J = 19.0$ , 5.4 Hz, 1H) |
| <b>3p</b> | 5.54 (s, 1H) | 4.74 (s, 1H) | 3.72 (dd, $J = 13.7$ , 5.3 Hz, 1H) | 2.98 (dd, $J = 19.0$ , 13.7 Hz, 1H)                                                                                    | 2.71 (dd, $J = 19.0$ , 5.3 Hz, 1H) |
| <b>3q</b> | 5.73 (s, 1H) | 4.73 (s, 1H) | 4.06 (dd, $J = 13.2$ , 5.9 Hz, 1H) | 2.86, 2.97 (ABq, $J = 19.2$ Hz, the lower half and upper half are further split into d with $J = 13.2$ and 5.9 Hz, 2H) |                                    |

**Table S2. Selected  $^{13}\text{C}$  NMR chemical shift (in ppm) values for double Michael adducts**

| <b>Entry</b> | <b>C1</b> | <b>C2</b> | <b>C3</b> | <b>C4</b> | <b>C5</b> | <b>C6</b> | <b>C7</b> |
|--------------|-----------|-----------|-----------|-----------|-----------|-----------|-----------|
| <b>3a</b>    | 91.0      | 106.2     | 35.4      | 37.1      | 41.3      | 191.1     | 116.6     |
| <b>3b</b>    | 91.1      | 106.7     | 35.5      | 37.0      | 41.6      | 192.1     | 116.8     |
| <b>3c</b>    | 91.0      | 106.5     | 35.5      | 36.9      | 41.6      | 191.8     | 116.9     |
| <b>3d</b>    | 91.1      | 106.5     | 35.5      | 36.9      | 41.6      | 191.9     | 116.9     |
| <b>3e</b>    | 91.2      | 106.5     | 35.4      | 37.0      | 41.6      | 192.0     | 116.9     |
| <b>3f</b>    | 91.0      | 106.7     | 35.6      | 37.0      | 41.6      | 192.0     | 116.9     |
| <b>3g</b>    | 91.2      | 106.8     | 35.7      | 37.0      | 41.6      | 192.1     | 116.9     |
| <b>3h</b>    | 90.8      | 106.1     | 35.5      | 37.0      | 41.7      | 192.1     | 118.0     |
| <b>3i</b>    | 91.1      | 106.6     | 35.4      | 37.0      | 41.3      | 191.8     | 116.8     |
| <b>3j</b>    | 90.9      | 106.6     | 35.4      | 37.0      | 41.0      | 191.9     | 116.9     |
| <b>3k</b>    | 91.0      | 106.6     | 35.4      | 37.1      | 40.9      | 191.7     | 116.9     |
| <b>3n</b>    | 90.8      | 106.7     | 35.4      | 36.9      | 41.2      | 192.1     | 117.0     |
| <b>3o</b>    | 90.8      | 106.8     | 35.5      | 36.9      | 41.2      | 192.1     | 117.0     |
| <b>3p</b>    | 91.1      | 106.4     | 35.4      | 37.1      | 41.3      | 191.3     | 116.6     |
| <b>3q</b>    | 91.0      | 106.1     | 35.4      | 38.0      | 38.7      | 190.3     | 116.9     |

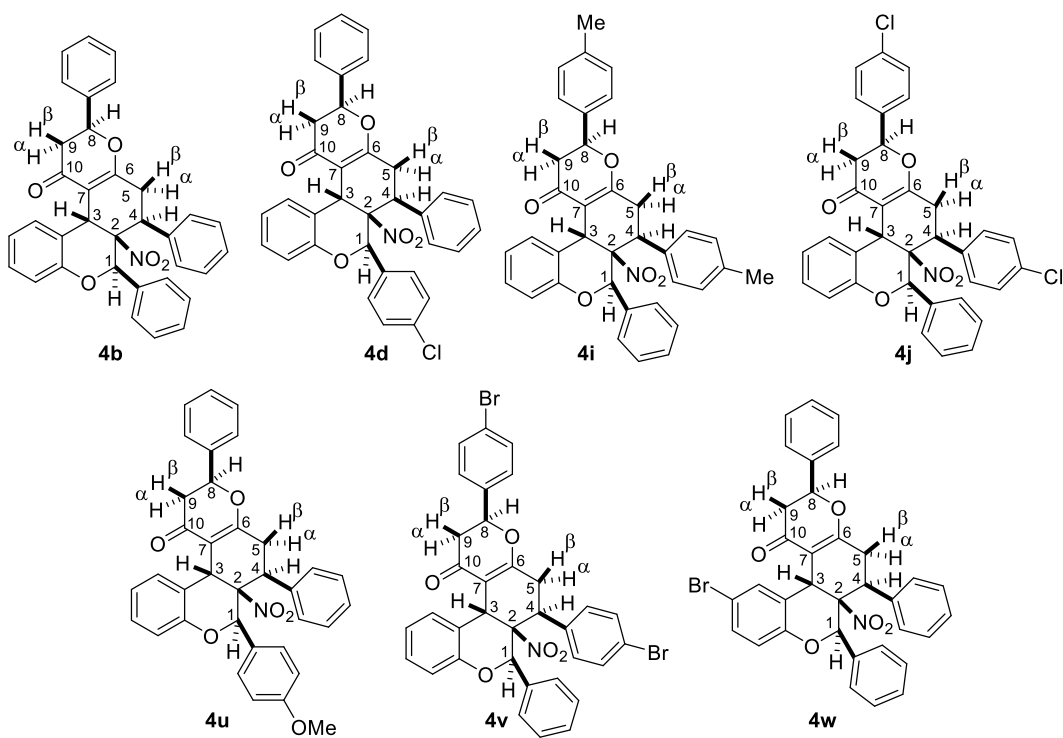

**Table S3. Selected <sup>1</sup>H NMR chemical shift (in ppm) values for triple Michael adducts**

| Entry     | C1-H         | C3-H          | C4-H                                   | C5-βH                                   | C5-αH                                   | C8-H                                              | C9-βH                                                                                                                       | C9-αH |
|-----------|--------------|---------------|----------------------------------------|-----------------------------------------|-----------------------------------------|---------------------------------------------------|-----------------------------------------------------------------------------------------------------------------------------|-------|
| <b>4b</b> | 5.44 (s, 1H) | 4.88 (s, 1H), | 3.81 (dd, <i>J</i> = 13.2, 5.2 Hz, 1H) | 3.06 (dd, <i>J</i> = 18.8, 13.2 Hz, 1H) | 2.60 (dd, <i>J</i> = 18.8, 5.2 Hz, 1H)  | 5.45 (dd, <i>J</i> = 13.7, 3.9 Hz, 1H)            | 2.86, 2.97 (ABq, <i>J</i> = 17.2 Hz, the lower and upper half are further split into d with <i>J</i> = 13.7 and 3.9 Hz, 2H) |       |
| <b>4d</b> | 5.42 (s, 1H) | 4.82 (s, 1H)  | 3.79 (dd, <i>J</i> = 13.0, 5.3 Hz, 1H) | 3.05 (dd, <i>J</i> = 18.8, 13.0 Hz, 1H) | 2.60 (dd, <i>J</i> = 18.8, 5.3 Hz, 1H)  | 5.44 (dd, <i>J</i> = 14.7, 3.8 Hz, 1H)            | 2.86, 2.98 (ABq, <i>J</i> = 17.1 Hz, the lower and upper half are further split into d with <i>J</i> = 14.7 and 3.8 Hz, 2H) |       |
| <b>4i</b> | 5.46 (s, 1H) | 4.88 (s, 1H)  | 3.78 (dd, <i>J</i> = 13.1, 5.4 Hz, 1H) | 3.04 (dd, <i>J</i> = 18.8, 13.1 Hz, 1H) | 2.57 (dd, <i>J</i> = 18.8, 5.4 Hz, 1H)  | 5.41 (dd, <i>J</i> = 14.4, 3.1 Hz, 1H)            | 2.83, 2.98 (ABq, <i>J</i> = 17.2 Hz, the lower and upper half are further split into d with <i>J</i> = 14.4 and 3.1 Hz, 2H) |       |
| <b>4j</b> | 5.39 (s, 1H) | 4.87 (s, 1H)  | 3.78 (dd, <i>J</i> = 12.9, 4.7 Hz, 1H) | 3.00 (dd, <i>J</i> = 18.3, 12.9 Hz, 1H) | 2.57 (dd, <i>J</i> = 18.3, 4.7 Hz, 1H), | 5.41 (overlapped dd, <i>J</i> = 14.6, 3.2 Hz, 1H) | 2.83, 2.97 (ABq, <i>J</i> = 17.1 Hz, the lower and upper half are further split into d with <i>J</i> = 14.6 and 3.2 Hz, 2H) |       |

|           |              |              |                                   |                                    |                                            |                                   |                                                                                                                     |
|-----------|--------------|--------------|-----------------------------------|------------------------------------|--------------------------------------------|-----------------------------------|---------------------------------------------------------------------------------------------------------------------|
| <b>4u</b> | 5.39 (s, 1H) | 4.89 (s, 1H) | 3.79 (dd, $J = 13.2, 5.5$ Hz, 1H) | 3.05 (dd, $J = 18.9, 13.1$ Hz, 1H) | $\delta$ 2.59 (dd, $J = 18.9, 5.5$ Hz, 1H) | 5.45 (dd, $J = 14.6, 3.3$ Hz, 1H) | 2.86, 2.98 (ABq, $J = 17.2$ Hz, the lower and upper half are further split into d with $J = 14.6$ and $3.3$ Hz, 2H) |
| <b>4v</b> | 5.39 (s, 1H) | 4.86 (s, 1H) | 3.76 (dd, $J = 13.2, 5.4$ Hz, 1H) | 2.99 (dd, $J = 18.9, 13.2$ Hz, 1H) | 2.57 (dd, $J = 18.9, 5.4$ Hz, 1H)          | 5.41 (dd, $J = 14.2, 3.9$ Hz, 1H) | 2.83, 2.90 (ABq, $J = 17.2$ Hz, the lower and upper half are further split into d with $J = 14.2$ and $3.9$ Hz, 2H) |
| <b>4w</b> | 5.32 (s, 1H) | 4.75 (s, 1H) | 3.63 (dd, $J = 13.1, 5.4$ Hz, 1H) | 2.95 (dd, $J = 18.9, 13.1$ Hz, 1H) | 2.52 (dd, $J = 18.9, 5.4$ Hz, 1H)          | 5.37 (dd, $J = 14.3, 4.0$ Hz, 1H) | 2.76, 2.97 (ABq, $J = 17.4$ Hz, the lower and upper half are further split into d with $J = 14.3$ and $4.0$ Hz, 2H) |

**Table S4. Selected  $^{13}\text{C}$  NMR chemical shift (in ppm) values for triple Michael adducts**

| Entry     | C1   | C2    | C3   | C4   | C5   | C6    | C7    | C8   | C9   | C10   |
|-----------|------|-------|------|------|------|-------|-------|------|------|-------|
| <b>4b</b> | 90.6 | 113.3 | 31.8 | 33.0 | 42.4 | 170.0 | 116.7 | 80.2 | 42.8 | 191.4 |
| <b>4d</b> | 90.4 | 113.2 | 31.8 | 32.9 | 42.4 | 170.0 | 116.7 | 80.2 | 42.8 | 191.4 |
| <b>4i</b> | 90.6 | 113.2 | 31.9 | 32.9 | 42.1 | 170.2 | 116.6 | 80.1 | 42.7 | 191.6 |
| <b>4j</b> | 90.4 | 113.4 | 31.7 | 32.9 | 41.9 | 169.4 | 116.7 | 79.5 | 42.7 | 190.9 |
| <b>4u</b> | 90.7 | 113.4 | 31.9 | 32.9 | 42.4 | 170.0 | 116.7 | 80.2 | 42.8 | 191.4 |
| <b>4v</b> | 90.4 | 113.5 | 31.7 | 32.9 | 42.0 | 169.4 | 116.7 | 79.5 | 42.7 | 190.9 |
| <b>4w</b> | 90.2 | 112.6 | 31.8 | 33.0 | 42.6 | 170.3 | 118.4 | 80.2 | 42.6 | 191.3 |

**Table S5. Crystal data and structure refinement for 3c (CCDC 2207121)**

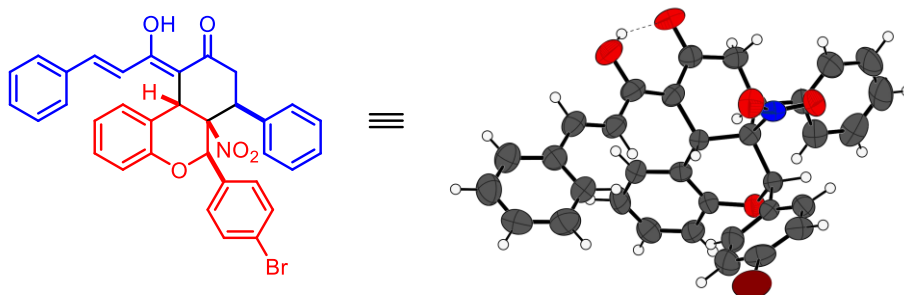

|                                    |                                                   |
|------------------------------------|---------------------------------------------------|
| Identification code                | INN_BL_AS_43_autored                              |
| Empirical formula                  | C <sub>34</sub> H <sub>26</sub> BrNO <sub>5</sub> |
| Formula weight                     | 608.47                                            |
| Temperature/K                      | 200(16)                                           |
| Crystal system                     | monoclinic                                        |
| Space group                        | P2 <sub>1</sub>                                   |
| a/Å                                | 10.6287(9)                                        |
| b/Å                                | 11.9136(7)                                        |
| c/Å                                | 12.2552(9)                                        |
| α/°                                | 90                                                |
| β/°                                | 113.667(10)                                       |
| γ/°                                | 90                                                |
| Volume/Å <sup>3</sup>              | 1421.3(2)                                         |
| Z                                  | 2                                                 |
| ρ <sub>calc</sub> /cm <sup>3</sup> | 1.422                                             |
| μ/mm <sup>-1</sup>                 | 1.490                                             |
| F(000)                             | 624.0                                             |
| Crystal size/mm <sup>3</sup>       | 0.17 × 0.14 × 0.12                                |
| Radiation                          | Mo Kα (λ = 0.71073)                               |
| 2θ range for data collection/°     | 3.628 to 49.984                                   |
| Index ranges                       | -12 ≤ h ≤ 12, -14 ≤ k ≤ 14, -14 ≤ l ≤ 14          |
| Reflections collected              | 25964                                             |

|                                                |                                                                  |
|------------------------------------------------|------------------------------------------------------------------|
| Independent reflections                        | 4992 [ $R_{\text{int}} = 0.1093$ , $R_{\text{sigma}} = 0.0916$ ] |
| Data/restraints/parameters                     | 4992/1/371                                                       |
| Goodness-of-fit on $F^2$                       | 1.002                                                            |
| Final R indexes [ $I \geq 2\sigma(I)$ ]        | $R_1 = 0.0474$ , $wR_2 = 0.0706$                                 |
| Final R indexes [all data]                     | $R_1 = 0.1056$ , $wR_2 = 0.0886$                                 |
| Largest diff. peak/hole / $e \text{ \AA}^{-3}$ | 0.20/-0.24                                                       |
| Flack parameter                                | 0.016(8)                                                         |

**Table S6. Crystal data and structure refinement for 4i (CCDC 2207119)**

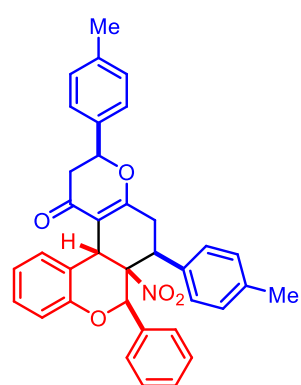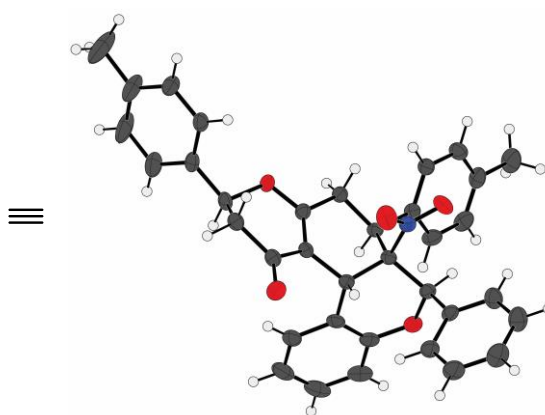

|                     |                             |
|---------------------|-----------------------------|
| Identification code | INN_BL_AS_134_autored       |
| Empirical formula   | $C_{73}H_{63}Cl_3N_2O_{10}$ |
| Formula weight      | 1234.60                     |
| Temperature/K       | 150.00(10)                  |
| Crystal system      | monoclinic                  |
| Space group         | $P2_1/n$                    |
| $a/\text{\AA}$      | 21.0341(5)                  |
| $b/\text{\AA}$      | 12.7886(2)                  |
| $c/\text{\AA}$      | 26.3878(6)                  |
| $\alpha/^\circ$     | 90                          |
| $\beta/^\circ$      | 109.626(3)                  |
| $\gamma/^\circ$     | 90                          |



|                                             |                                                                   |
|---------------------------------------------|-------------------------------------------------------------------|
| Volume/Å <sup>3</sup>                       | 6685.9(3)                                                         |
| Z                                           | 4                                                                 |
| $\rho_{\text{calc}}/\text{cm}^3$            | 1.227                                                             |
| $\mu/\text{mm}^{-1}$                        | 0.196                                                             |
| F(000)                                      | 2584.0                                                            |
| Crystal size/mm <sup>3</sup>                | 0.23 × 0.18 × 0.15                                                |
| Radiation                                   | Mo K $\alpha$ ( $\lambda = 0.71073$ )                             |
| 2 $\Theta$ range for data collection/°      | 3.028 to 50                                                       |
| Index ranges                                | -25 ≤ h ≤ 25, -15 ≤ k ≤ 15, -31 ≤ l ≤ 31                          |
| Reflections collected                       | 150854                                                            |
| Independent reflections                     | 11768 [ $R_{\text{int}} = 0.0664$ , $R_{\text{sigma}} = 0.0267$ ] |
| Data/restraints/parameters                  | 11768/0/797                                                       |
| Goodness-of-fit on F <sup>2</sup>           | 1.023                                                             |
| Final R indexes [ $I \geq 2\sigma(I)$ ]     | $R_1 = 0.0710$ , $wR_2 = 0.2077$                                  |
| Final R indexes [all data]                  | $R_1 = 0.0865$ , $wR_2 = 0.2252$                                  |
| Largest diff. peak/hole / e Å <sup>-3</sup> | 0.62/-0.85                                                        |

**Table S7. Selected torsional angles from X-ray data**

| Chemical structure                                                                  | Atom number                                                    | Torsional angle (°) |
|-------------------------------------------------------------------------------------|----------------------------------------------------------------|---------------------|
| 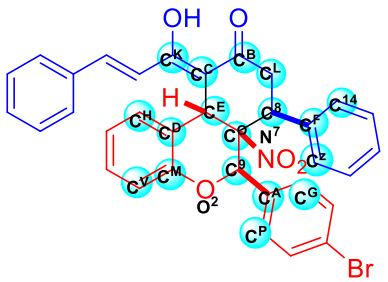 | C <sup>A</sup> -C <sup>9</sup> -C <sup>O</sup> -N <sup>7</sup> | 56.0                |
|                                                                                     | C <sup>F</sup> -C <sup>8</sup> -C <sup>O</sup> -N <sup>7</sup> | 71.3                |
|                                                                                     | C <sup>D</sup> -C <sup>E</sup> -C <sup>O</sup> -N <sup>7</sup> | -167.5              |

|                                                                                   |                                                                                              |                        |
|-----------------------------------------------------------------------------------|----------------------------------------------------------------------------------------------|------------------------|
| 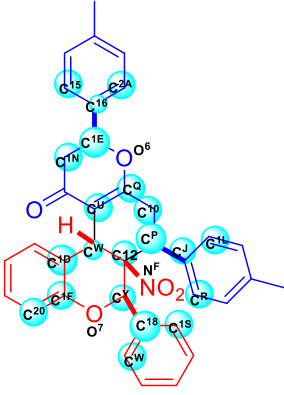 | $C^J - C^P - C^{12} - N^F$<br>$C^{18} - C^Y - C^{12} - N^F$<br>$C^{1D} - C^W - C^{12} - N^F$ | 71.8<br>50.1<br>-167.2 |
|-----------------------------------------------------------------------------------|----------------------------------------------------------------------------------------------|------------------------|

### 3. References

1. K. Mohri, Y. Watanabe, Y. Yoshida, M. Satoh, K. Isobe, N. Sugimoto and Y. Tsuda, *Chem. Pharm. Bull.*, 2003, **51**, 1268.
2. S. Nayak, P. Panda, S. Mohapatra, B. Raiguru and N. Baral, *J. Heterocycl. Chem.*, 2019, **56**, 1757.
