# Supplementary material for: Regio- and stereoselective synthesis of functionalized tetrahydro-benzochromenes and hexahydrochromenochromenones via [4 + 2] annulation of curcumins with nitrochromenes
Source: Royal Society of Chemistry journal article supplement (doi:10.1039/d2ob02211g), 2023-01-01
Supplement: d2ob02211g2.pdf [file d2ob02211g2.pdf]

Supplementary Information  
For

**Regio- and stereoselective synthesis of functionalized tetrahydrobenzochromenes and hexahydrochromenochromenones via [4+2] annulation of curcumins with nitrochromenes**

Banamali Laha, Alati Suresh and Irishi N N Namboothiri\*

*Department of Chemistry and Indian Institute of Technology, Bombay, Mumbai 400 076*  
irishi@iitb.ac.in

| <b>Entry</b> | <b>Table of contents</b>                                                | <b>Page</b> |
|--------------|-------------------------------------------------------------------------|-------------|
| 01           | <b>Figure S01. <sup>1</sup>H NMR Spectrum of 3a</b>                     | 04          |
| 02           | <b>Figure S02. <sup>13</sup>C NMR Spectrum of 3a</b>                    | 05          |
| 03           | <b>Figure S03. <sup>13</sup>C-APT NMR Spectrum of 3a</b>                | 06          |
| 04           | <b>Figure S04. <sup>1</sup>H NMR Spectrum of 3b</b>                     | 07          |
| 05           | <b>Figure S05. <sup>13</sup>C NMR Spectrum of 3b</b>                    | 08          |
| 06           | <b>Figure S06. <sup>13</sup>C-APT NMR Spectrum of 3b</b>                | 09          |
| 07           | <b>Figure S07. <sup>1</sup>H-<sup>1</sup>H COSY NMR Spectrum of 3b</b>  | 10          |
| 08           | <b>Figure S08. <sup>1</sup>H NMR Spectrum of 3c</b>                     | 11          |
| 09           | <b>Figure S09. <sup>13</sup>C NMR Spectrum of 3c</b>                    | 12          |
| 10           | <b>Figure S10. <sup>13</sup>C-APT NMR Spectrum of 3c</b>                | 13          |
| 11           | <b>Figure S11. <sup>1</sup>H NMR Spectrum of 3d</b>                     | 14          |
| 12           | <b>Figure S12. <sup>13</sup>C NMR Spectrum of 3d</b>                    | 15          |
| 13           | <b>Figure S13. <sup>13</sup>C-APT NMR Spectrum of 3d</b>                | 16          |
| 14           | <b>Figure S14. <sup>1</sup>H-<sup>1</sup>H COSY NMR Spectrum of 3d</b>  | 17          |
| 15           | <b>Figure S15. <sup>1</sup>H-<sup>1</sup>H NOESY NMR Spectrum of 3d</b> | 18          |
| 16           | <b>Figure S16. <sup>1</sup>H NMR Spectrum of 3e</b>                     | 19          |
| 17           | <b>Figure S17. <sup>13</sup>C NMR Spectrum of 3e</b>                    | 20          |
| 18           | <b>Figure S18. <sup>13</sup>C-APT NMR Spectrum of 3e</b>                | 21          |

|    |                                                            |    |
|----|------------------------------------------------------------|----|
| 19 | <b>Figure S19.</b> $^{19}\text{F}$ NMR Spectrum of 3e      | 22 |
| 20 | <b>Figure S20.</b> $^1\text{H}$ NMR Spectrum of 3f         | 23 |
| 21 | <b>Figure S21.</b> $^{13}\text{C}$ NMR Spectrum of 3f      | 24 |
| 22 | <b>Figure S22.</b> $^{13}\text{C}$ -APT NMR Spectrum of 3f | 25 |
| 23 | <b>Figure S23.</b> $^1\text{H}$ NMR Spectrum of 3g         | 26 |
| 24 | <b>Figure S24.</b> $^{13}\text{C}$ NMR Spectrum of 3g      | 27 |
| 25 | <b>Figure S25.</b> $^1\text{H}$ NMR Spectrum of 3h         | 28 |
| 26 | <b>Figure S26.</b> $^{13}\text{C}$ NMR Spectrum of 3h      | 29 |
| 27 | <b>Figure S27.</b> $^{13}\text{C}$ -APT NMR Spectrum of 3h | 30 |
| 28 | <b>Figure S28.</b> $^1\text{H}$ NMR Spectrum of 3i         | 31 |
| 29 | <b>Figure S29.</b> $^{13}\text{C}$ NMR Spectrum of 3i      | 32 |
| 30 | <b>Figure S30.</b> $^{13}\text{C}$ -APT NMR Spectrum of 3i | 33 |
| 31 | <b>Figure S31.</b> $^1\text{H}$ NMR Spectrum of 3j         | 34 |
| 32 | <b>Figure S32.</b> $^{13}\text{C}$ NMR Spectrum of 3j      | 35 |
| 33 | <b>Figure S33.</b> $^{13}\text{C}$ -APT NMR Spectrum of 3j | 36 |
| 34 | <b>Figure S34.</b> $^1\text{H}$ NMR Spectrum of 3k         | 37 |
| 35 | <b>Figure S35.</b> $^{13}\text{C}$ NMR Spectrum of 3k      | 38 |
| 36 | <b>Figure S36.</b> $^{13}\text{C}$ -APT NMR Spectrum of 3k | 39 |
| 37 | <b>Figure S37.</b> $^{19}\text{F}$ NMR Spectrum of 3k      | 40 |
| 38 | <b>Figure S38.</b> $^1\text{H}$ NMR Spectrum of 3n         | 41 |
| 39 | <b>Figure S39.</b> $^{13}\text{C}$ NMR Spectrum of 3n      | 42 |
| 40 | <b>Figure S40.</b> $^{13}\text{C}$ -APT NMR Spectrum of 3n | 43 |
| 41 | <b>Figure S41.</b> $^1\text{H}$ NMR Spectrum of 3o         | 44 |
| 42 | <b>Figure S42.</b> $^{13}\text{C}$ NMR Spectrum of 3o      | 45 |
| 43 | <b>Figure S43.</b> $^{13}\text{C}$ -APT NMR Spectrum of 3o | 46 |
| 44 | <b>Figure S44.</b> $^1\text{H}$ NMR Spectrum of 3p         | 47 |
| 45 | <b>Figure S45.</b> $^{13}\text{C}$ NMR Spectrum of 3p      | 48 |
| 46 | <b>Figure S46.</b> $^1\text{H}$ NMR Spectrum of 3q         | 49 |
| 47 | <b>Figure S47.</b> $^{13}\text{C}$ NMR Spectrum of 3q      | 50 |
| 48 | <b>Figure S48.</b> $^1\text{H}$ NMR Spectrum of 4b         | 51 |

|    |                                                                         |    |
|----|-------------------------------------------------------------------------|----|
| 49 | <b>Figure S49.</b> $^{13}\text{C}$ NMR Spectrum of 4b                   | 52 |
| 50 | <b>Figure S50.</b> $^{13}\text{C}$ -APT NMR Spectrum of 4b              | 53 |
| 51 | <b>Figure S51.</b> $^1\text{H}$ NMR Spectrum of 4d                      | 54 |
| 52 | <b>Figure S52.</b> $^{13}\text{C}$ NMR Spectrum of 4d                   | 55 |
| 53 | <b>Figure S53.</b> $^{13}\text{C}$ -APT NMR Spectrum of 4d              | 56 |
| 54 | <b>Figure S54.</b> $^1\text{H}$ - $^1\text{H}$ COSY NMR Spectrum of 4d  | 57 |
| 55 | <b>Figure S55.</b> $^1\text{H}$ - $^1\text{H}$ NOESY NMR Spectrum of 4d | 58 |
| 56 | <b>Figure S56.</b> $^1\text{H}$ NMR Spectrum of 4i                      | 59 |
| 57 | <b>Figure S57.</b> $^{13}\text{C}$ NMR Spectrum of 4i                   | 60 |
| 58 | <b>Figure S58.</b> $^{13}\text{C}$ -APT NMR Spectrum of 4i              | 61 |
| 59 | <b>Figure S59.</b> $^1\text{H}$ NMR Spectrum of 4j                      | 62 |
| 60 | <b>Figure S60.</b> $^{13}\text{C}$ NMR Spectrum of 4j                   | 63 |
| 61 | <b>Figure S61.</b> $^{13}\text{C}$ -APT NMR Spectrum of 4j              | 64 |
| 62 | <b>Figure S62.</b> $^1\text{H}$ NMR Spectrum of 4u                      | 65 |
| 63 | <b>Figure S63.</b> $^{13}\text{C}$ NMR Spectrum of 4u                   | 66 |
| 64 | <b>Figure S64.</b> $^{13}\text{C}$ -APT NMR Spectrum of 4u              | 67 |
| 65 | <b>Figure S65.</b> $^1\text{H}$ NMR Spectrum of 4v                      | 68 |
| 66 | <b>Figure S66.</b> $^{13}\text{C}$ NMR Spectrum of 4v                   | 69 |
| 67 | <b>Figure S67.</b> $^{13}\text{C}$ -APT Spectrum of 4v                  | 70 |
| 68 | <b>Figure S68.</b> $^1\text{H}$ NMR Spectrum of 4w                      | 71 |
| 69 | <b>Figure S69.</b> $^{13}\text{C}$ NMR Spectrum of 4w                   | 72 |
| 70 | <b>Figure S70.</b> $^{13}\text{C}$ -APT NMR Spectrum of 4w              | 73 |
| 71 | <b>Figure S71.</b> HPLC Profile of Racemic 3b                           | 74 |
| 72 | <b>Figure S72.</b> HPLC Profile of 3b'                                  | 75 |
| 73 | <b>Figure S73.</b> HPLC Profile of Racemic 2b                           | 76 |
| 74 | <b>Figure S74.</b> HPLC Profile of 2b'                                  | 77 |

---

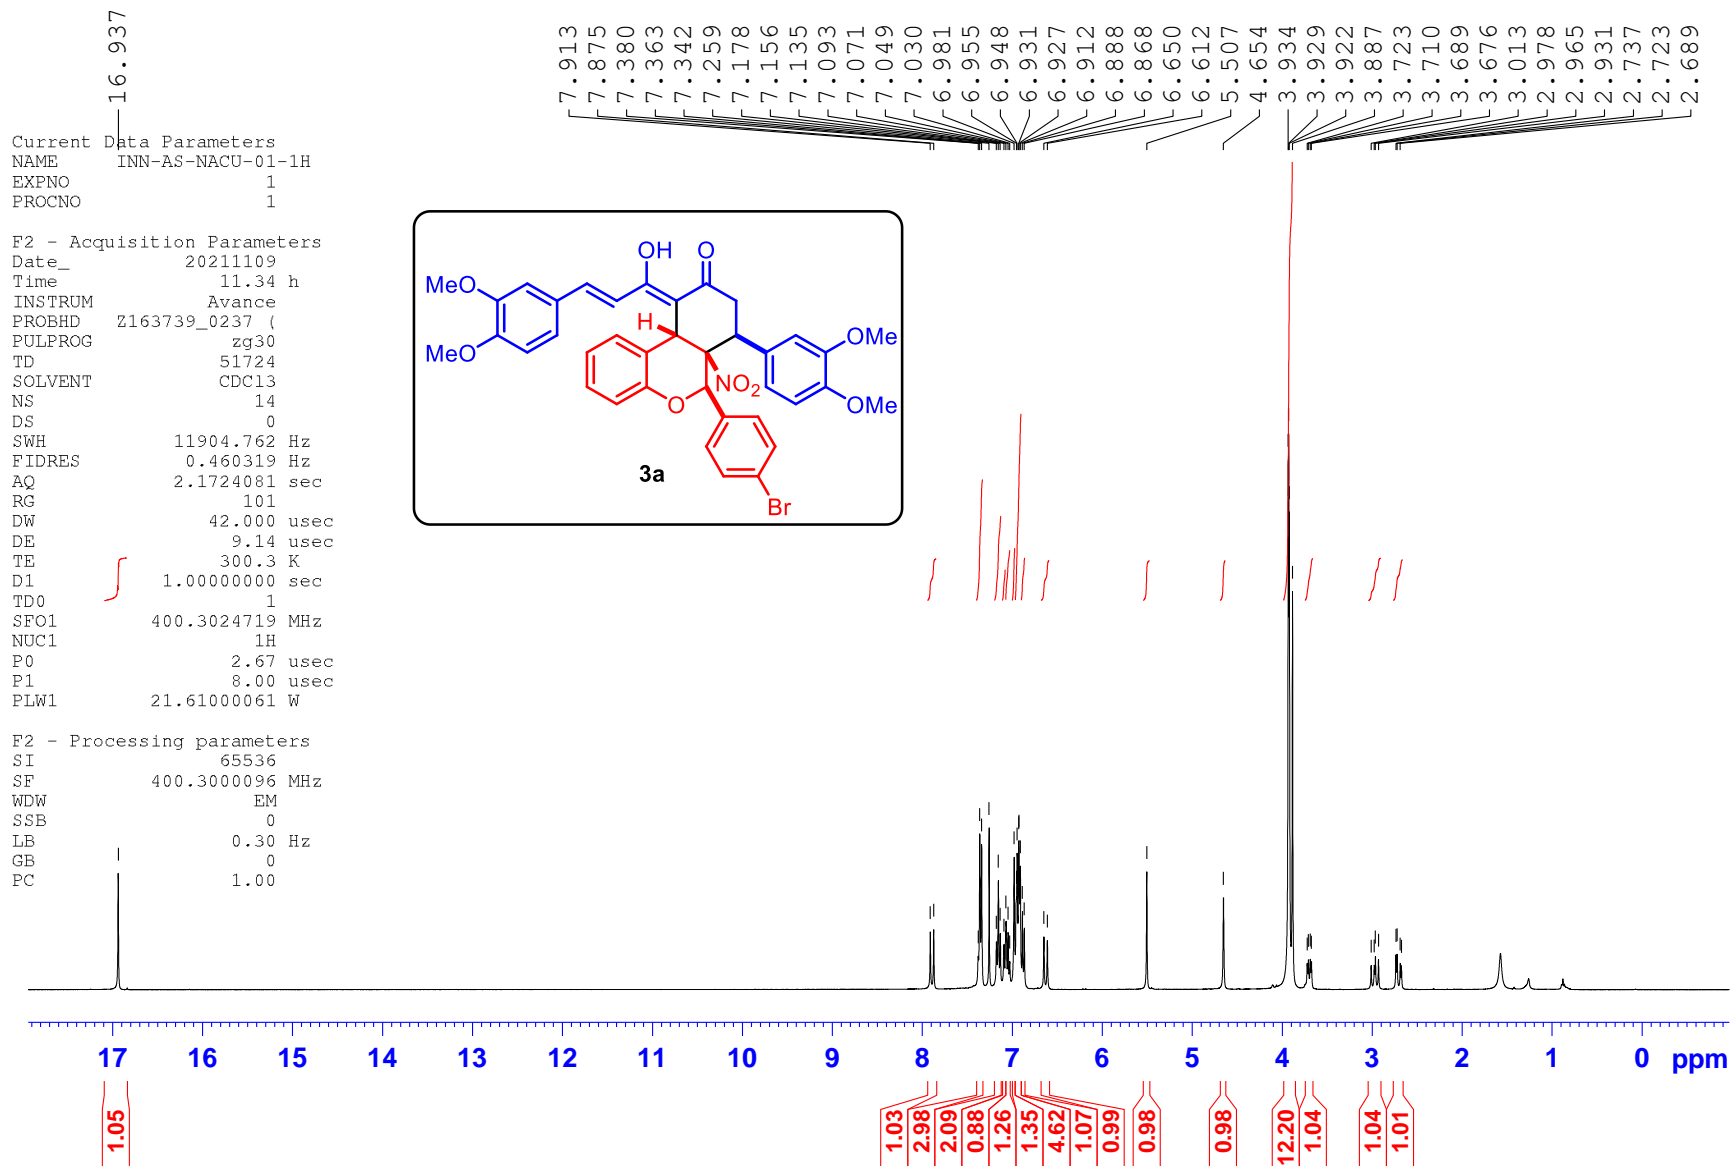

Figure S01. <sup>1</sup>H NMR Spectrum of 3a

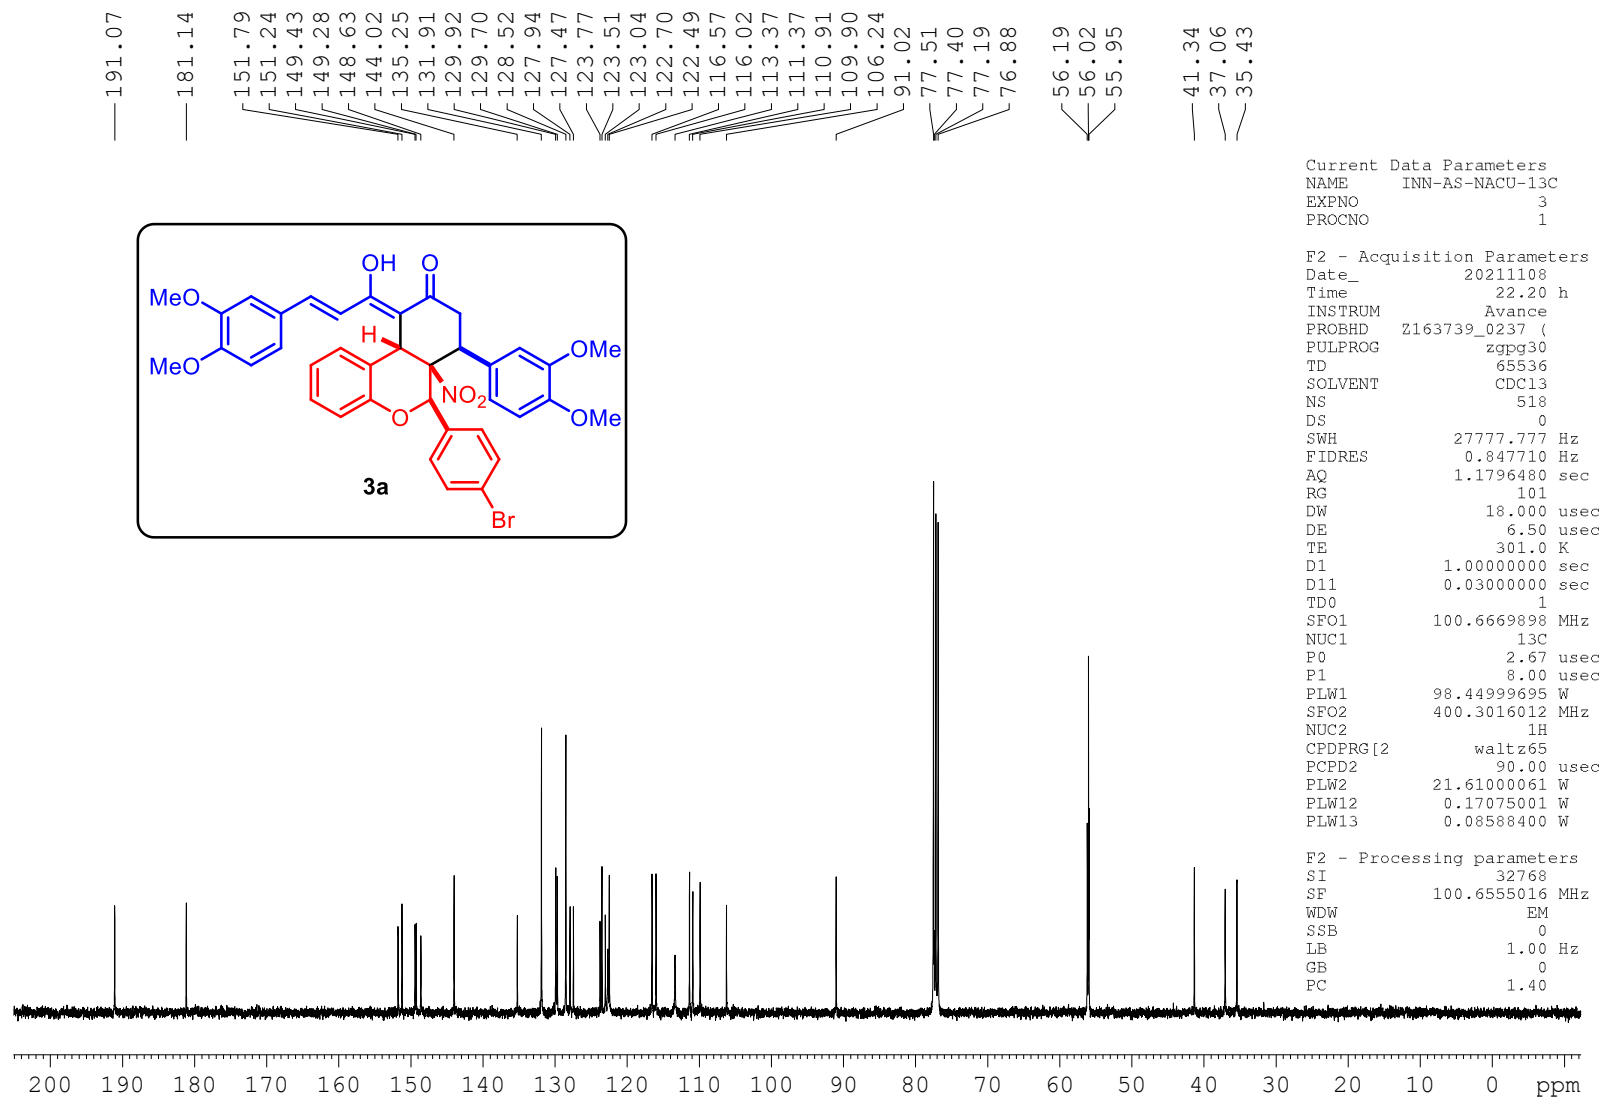

Figure S02. <sup>13</sup>C NMR Spectrum of 3a

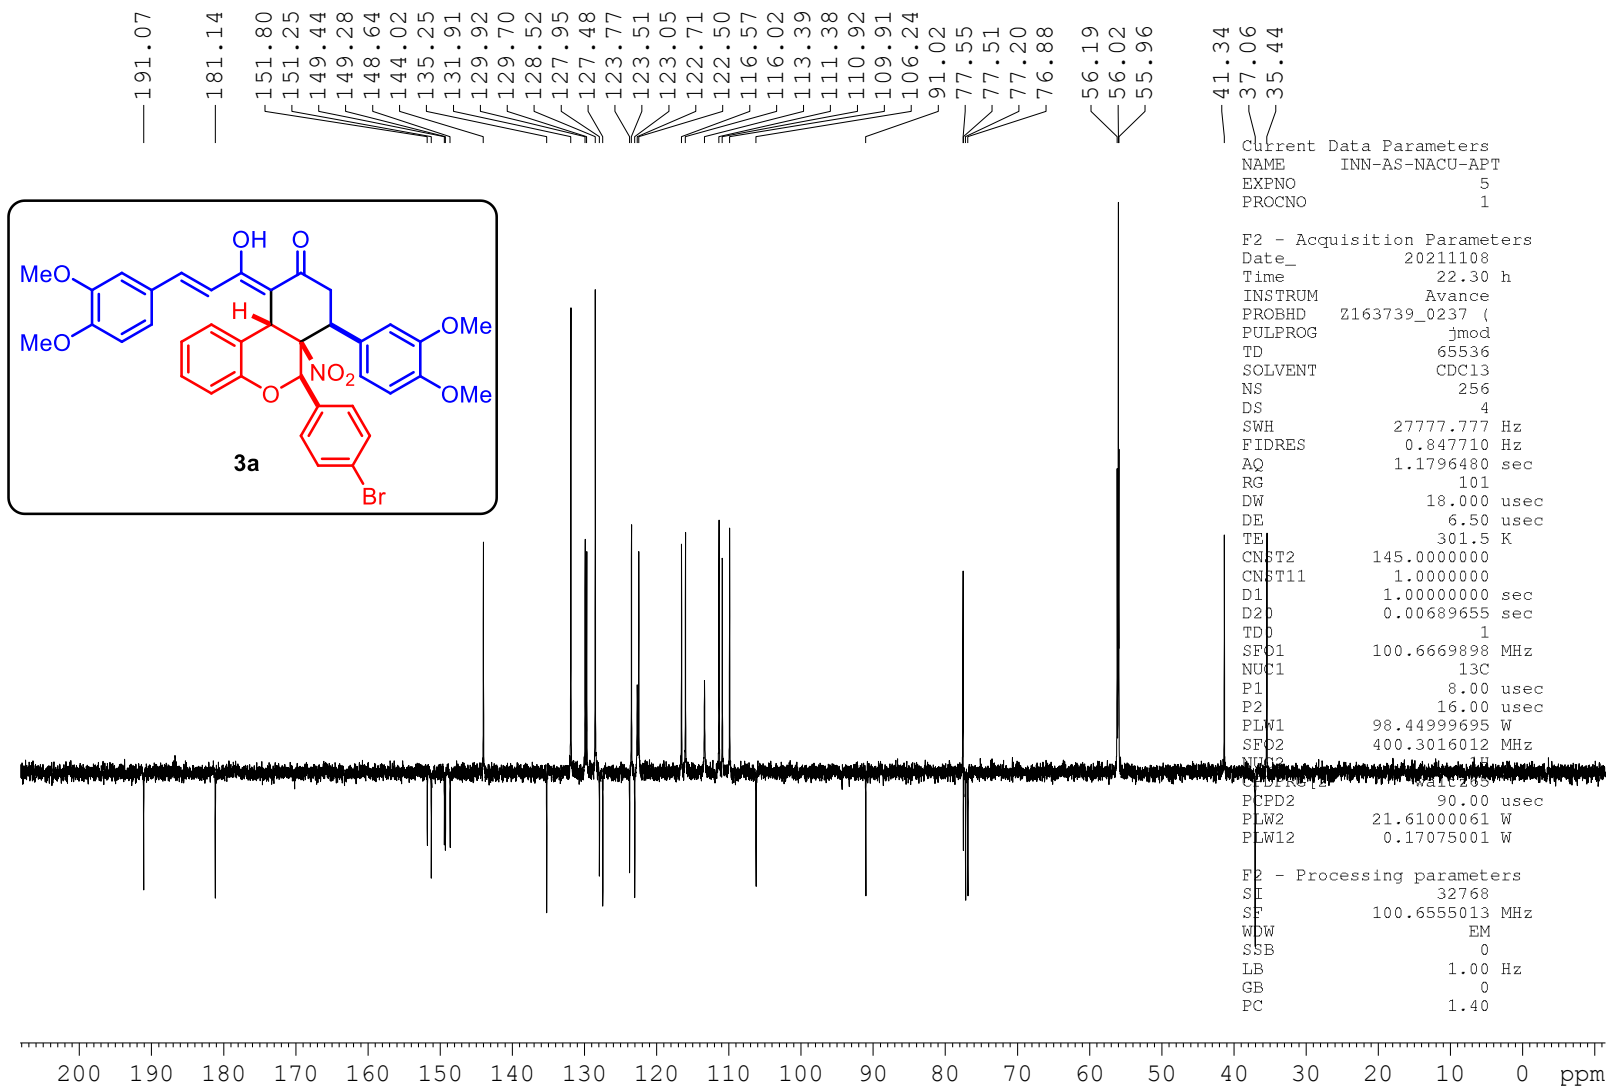

Figure S03. <sup>13</sup>C-APT NMR Spectrum of **3a**

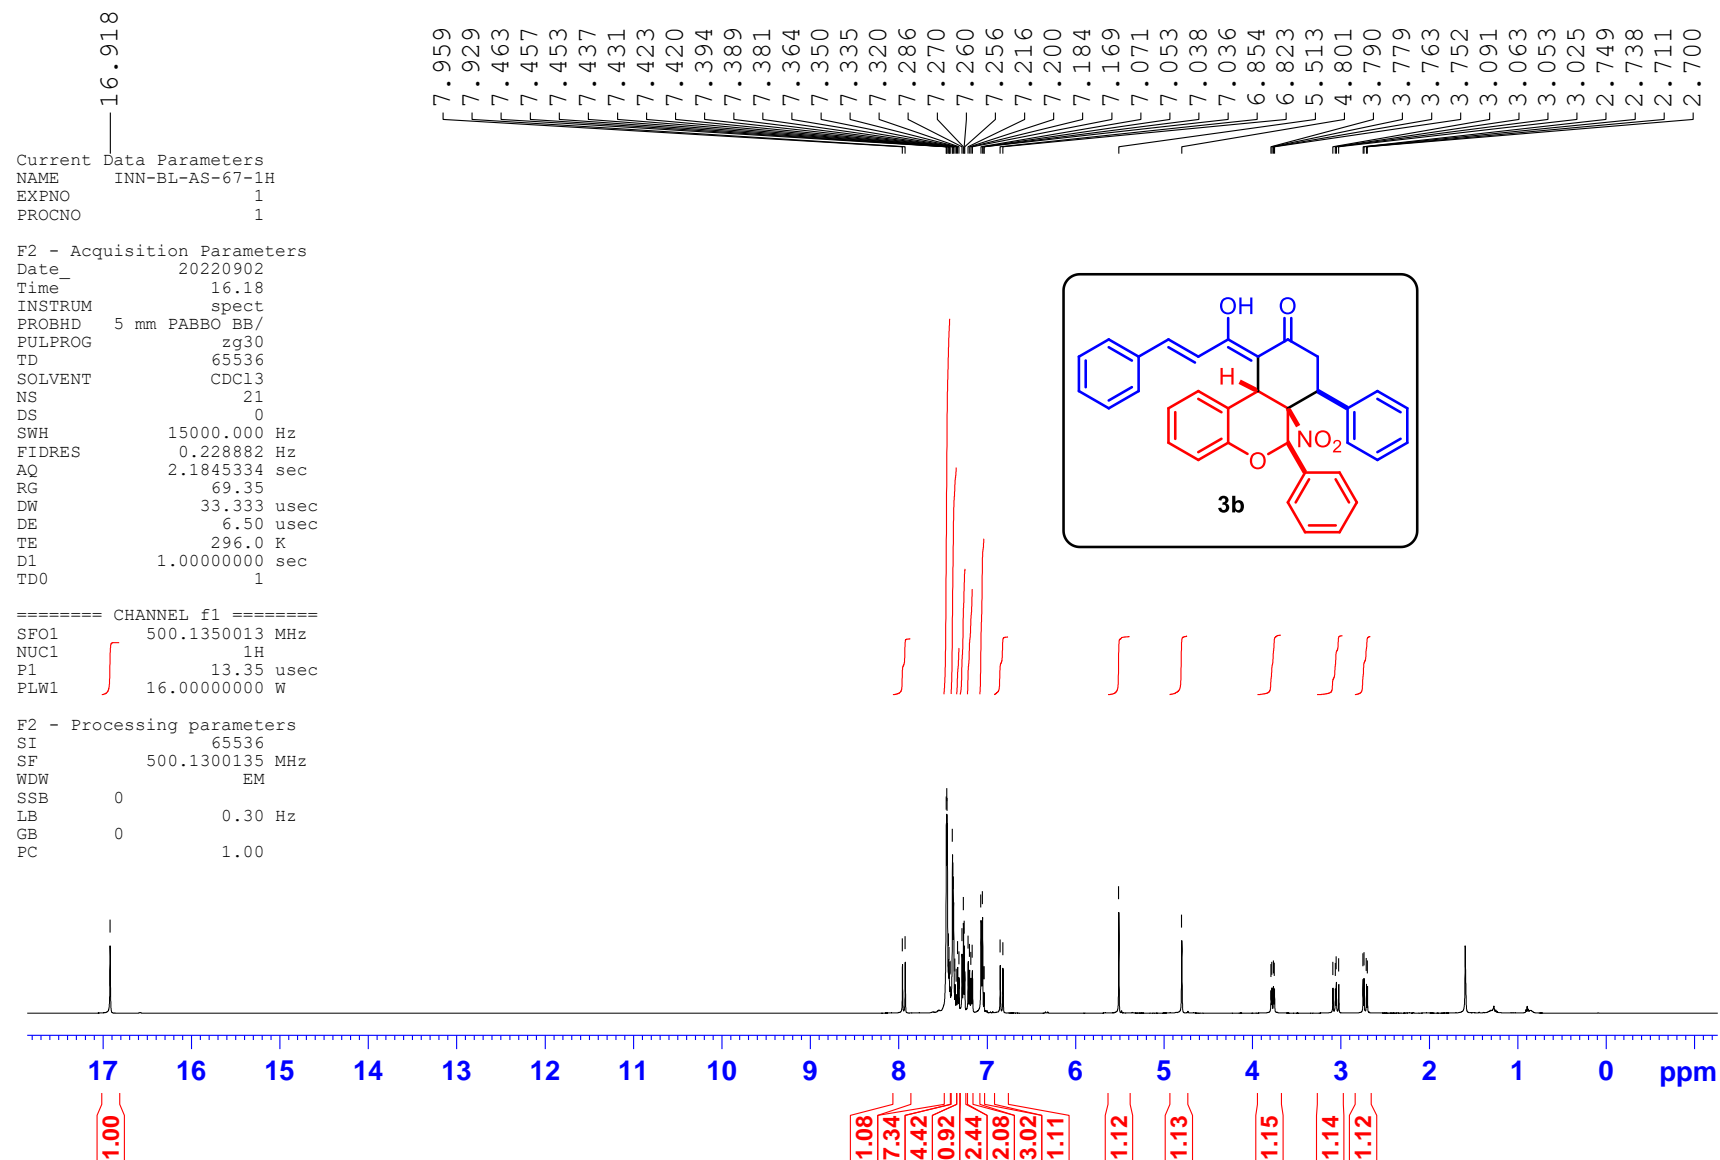

Figure S04. <sup>1</sup>H NMR Spectrum of 3b

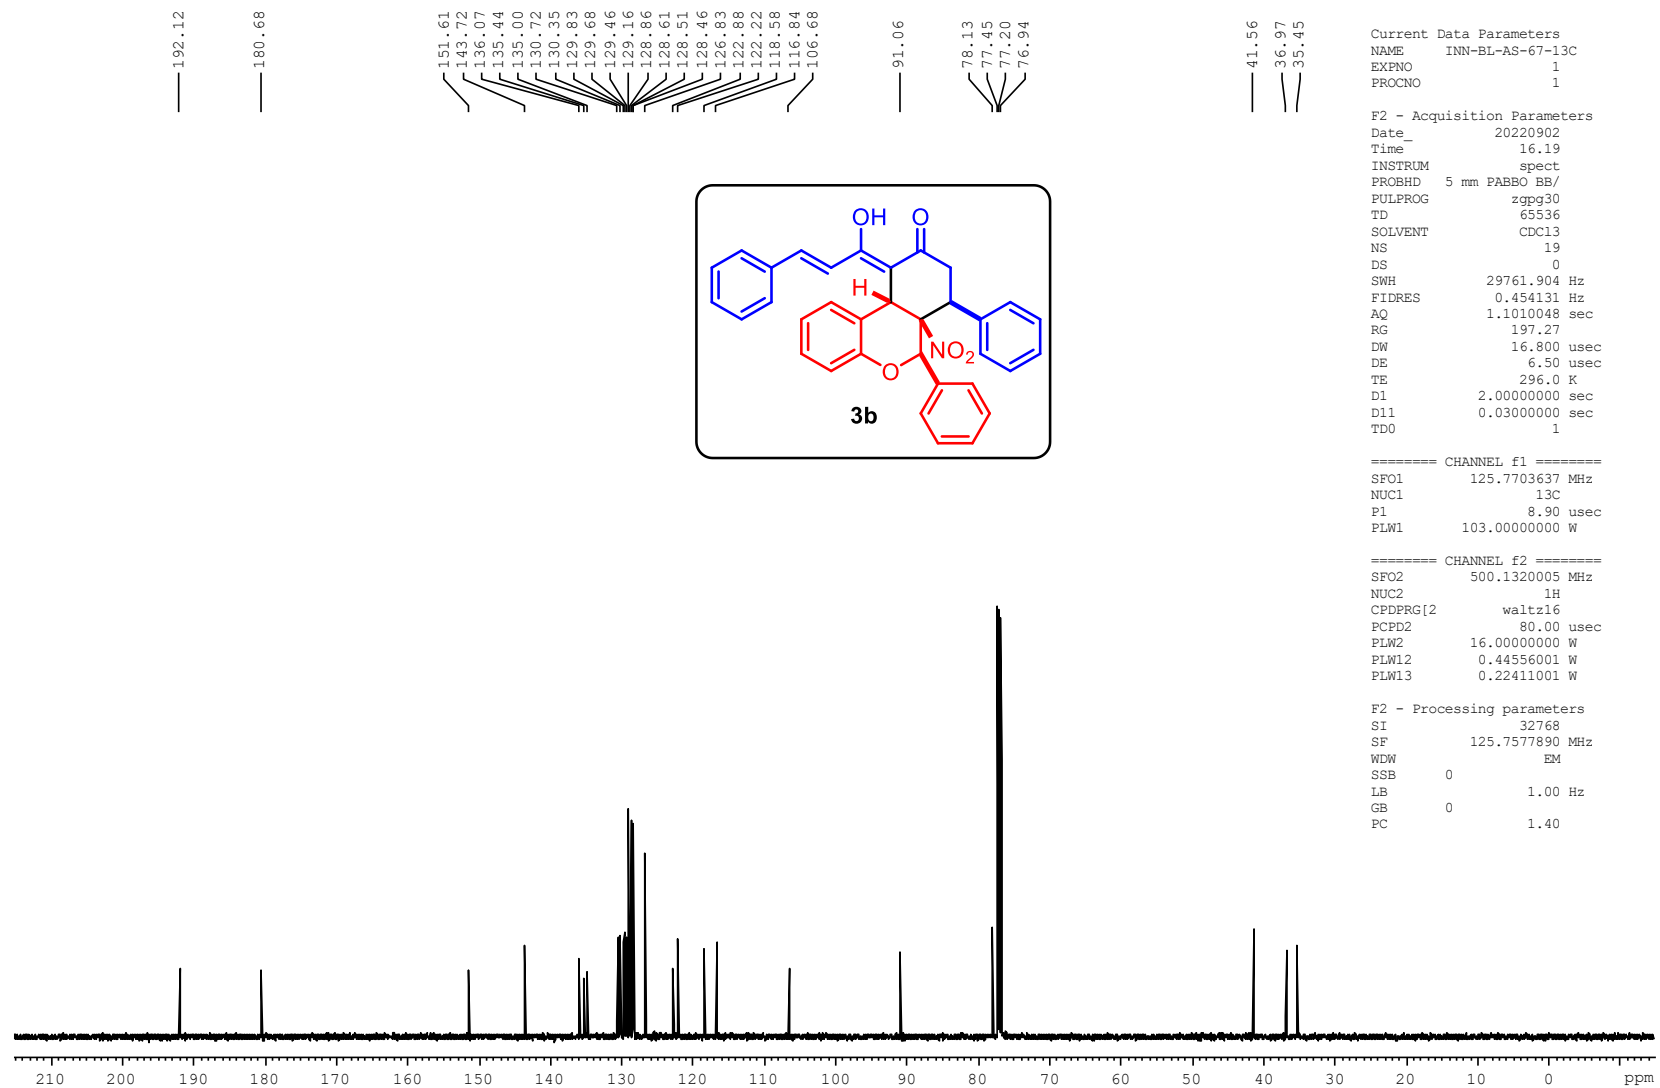

Figure S05. <sup>13</sup>C NMR Spectrum of **3b**



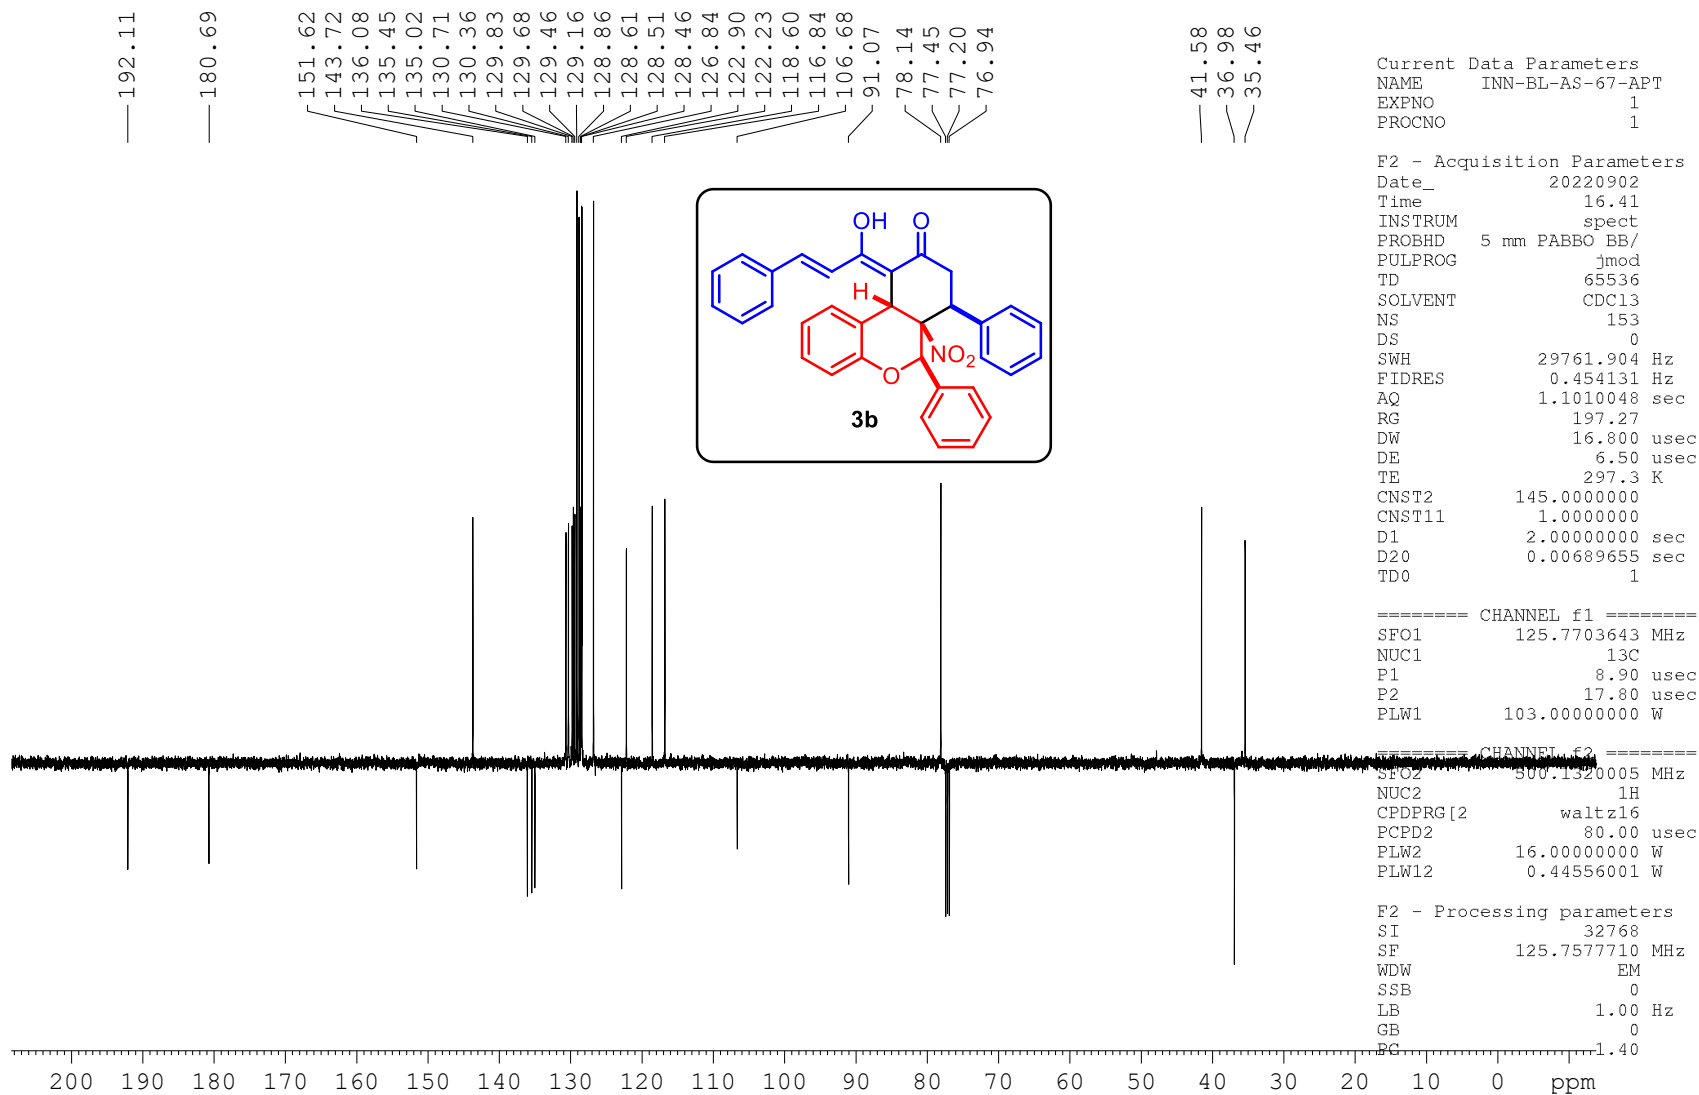

Figure S06. <sup>13</sup>C-APT NMR Spectrum of 3b

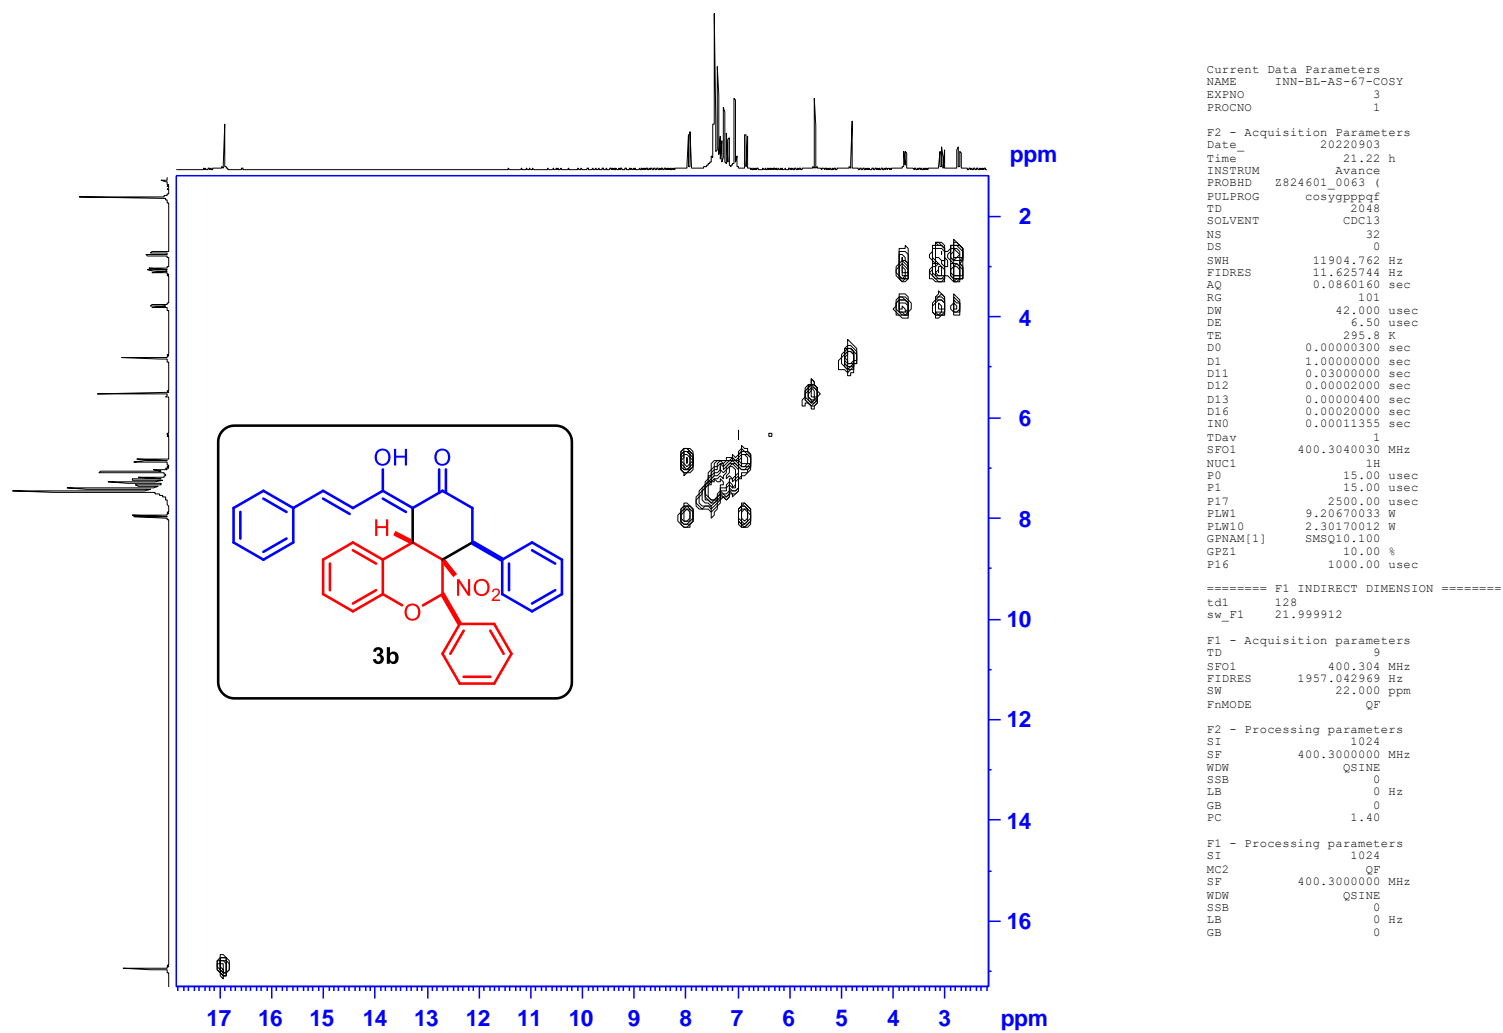

Figure S07.  $^1\text{H}$ - $^1\text{H}$  COSY NMR Spectrum of 3b

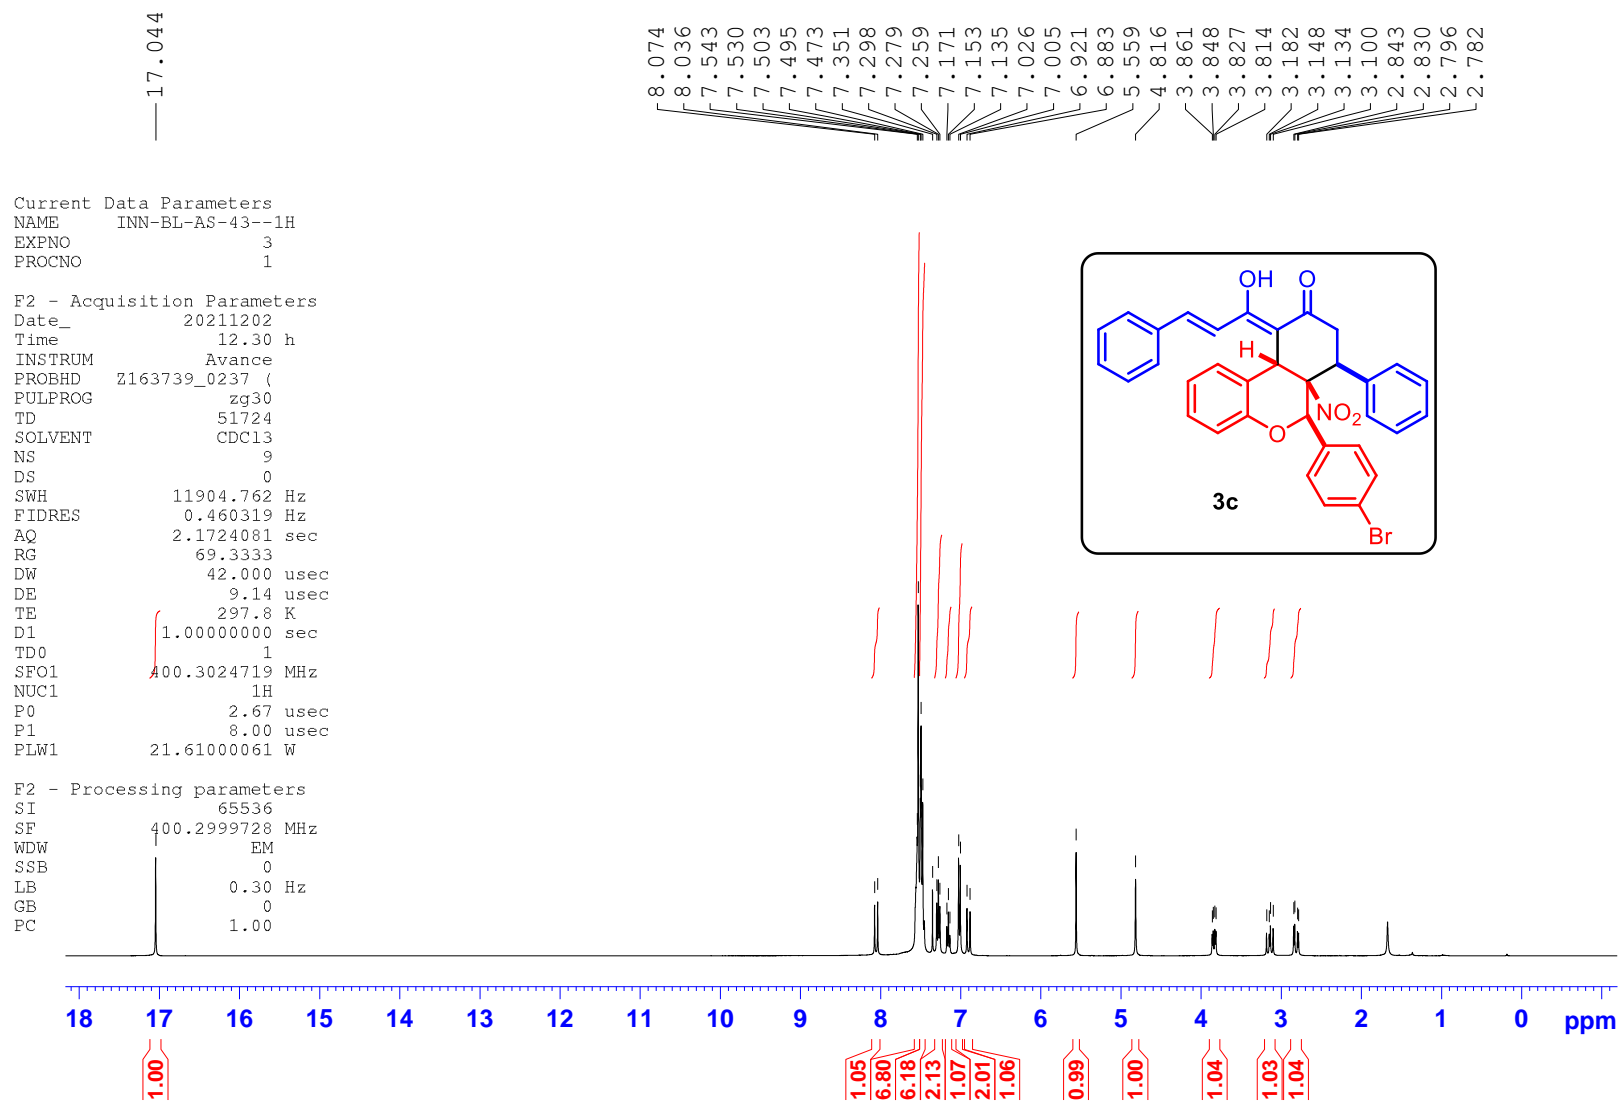

Figure S08. <sup>1</sup>H NMR Spectrum of 3c

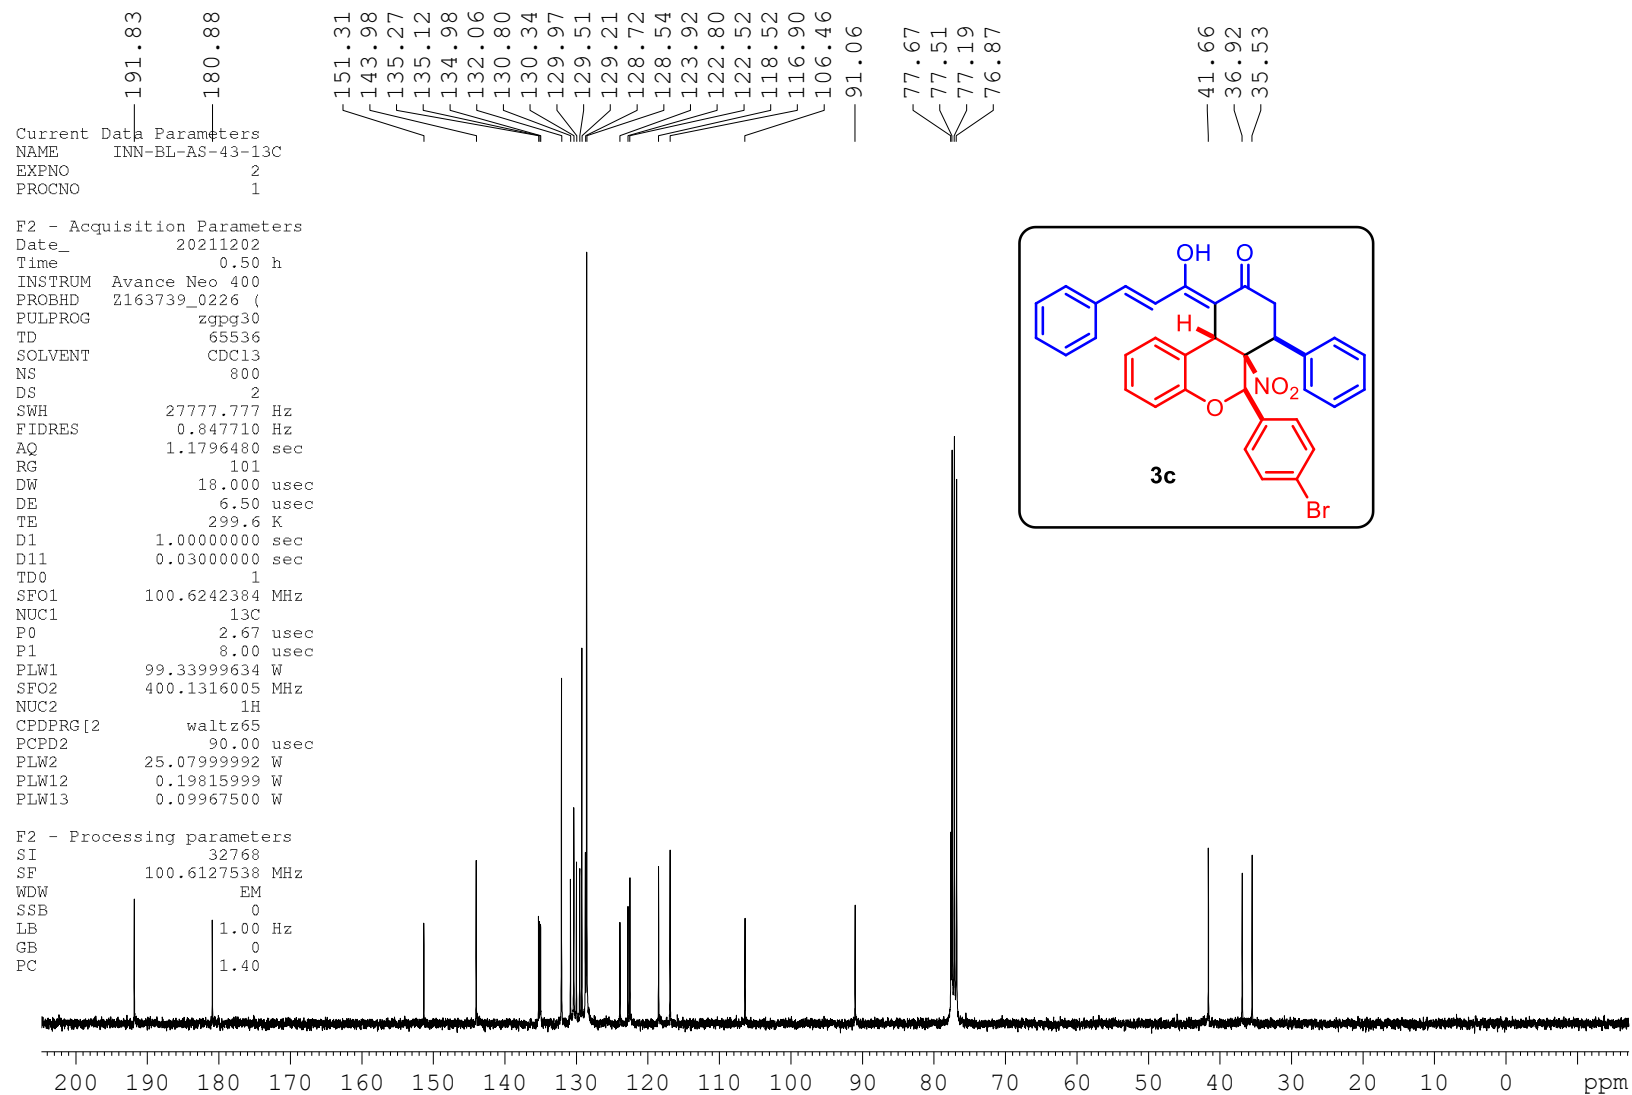

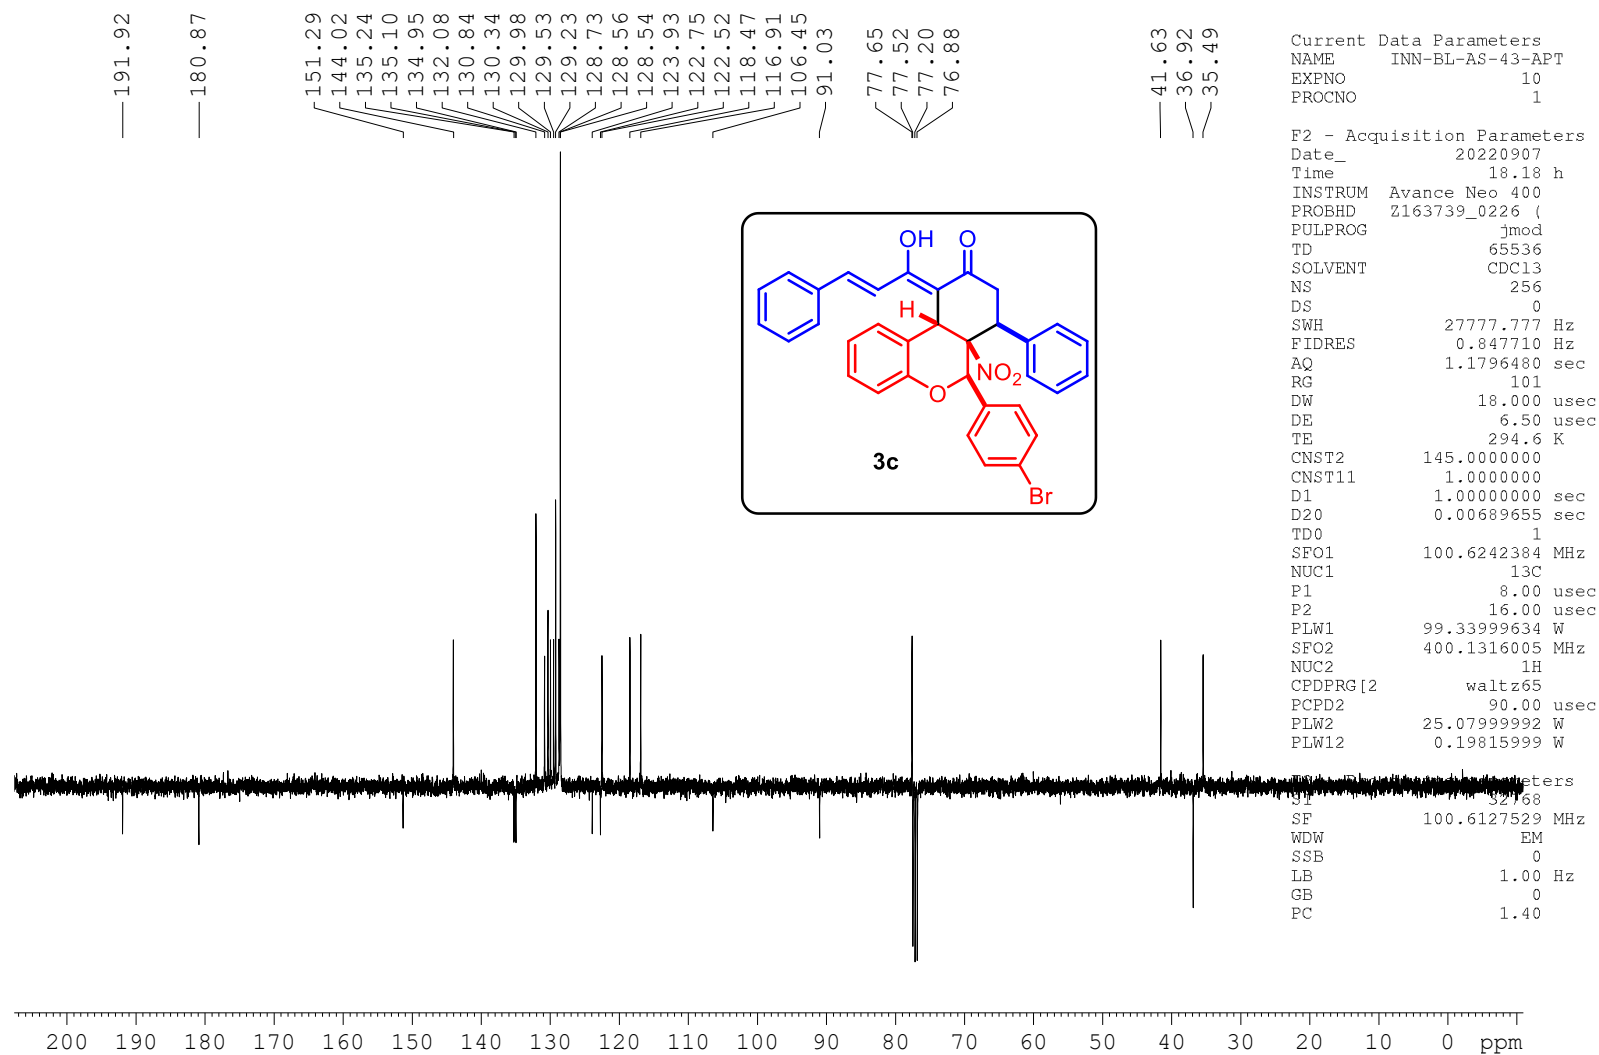

Figure S10. <sup>13</sup>C-APT Spectrum of 3c

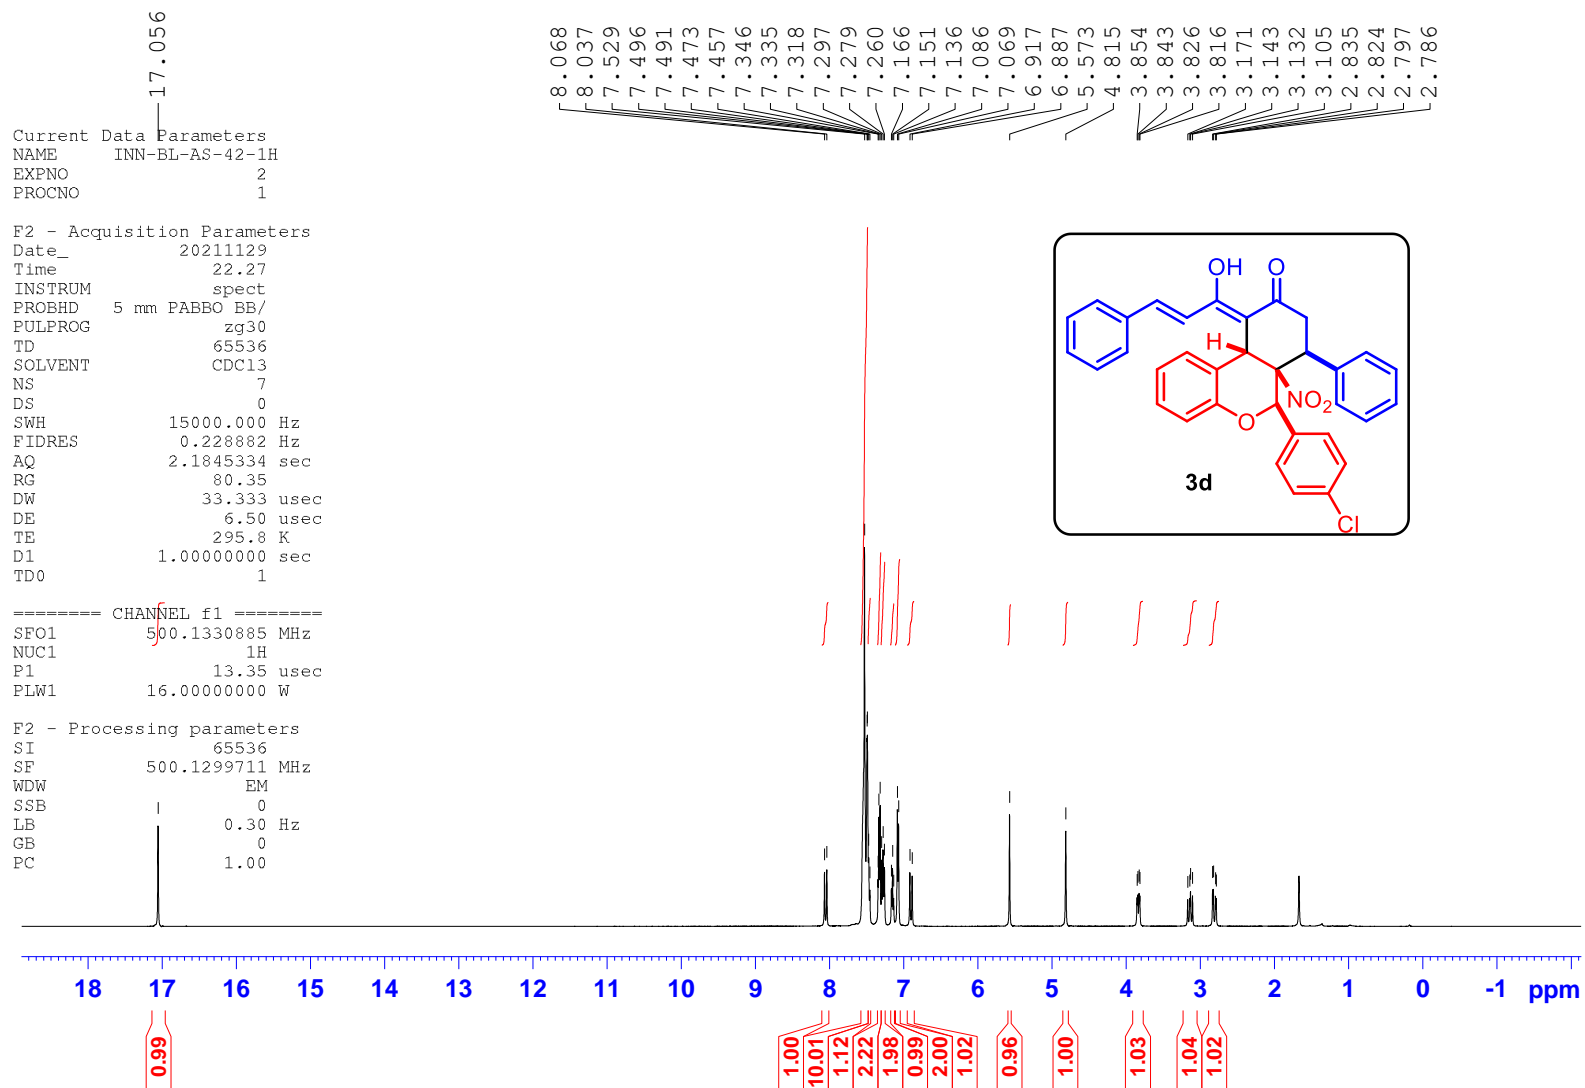

Figure S11. <sup>1</sup>H NMR Spectrum of **3d**

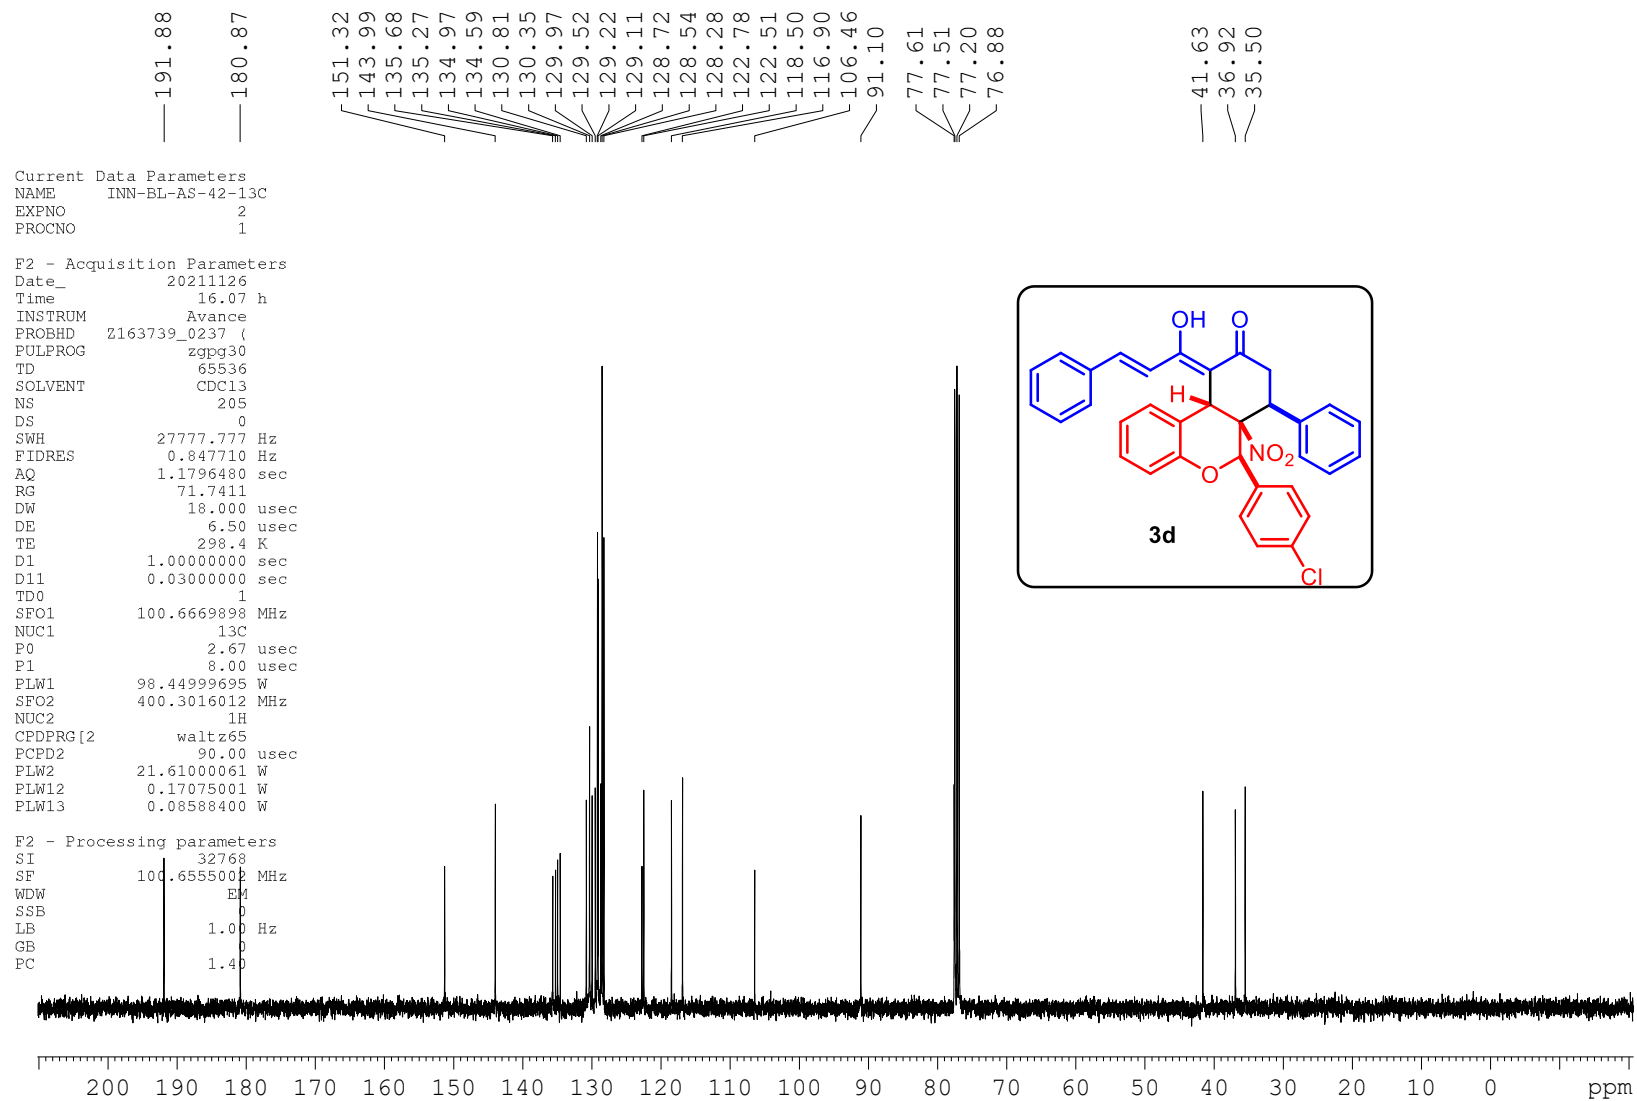

Figure S12. <sup>13</sup>C NMR Spectrum of 3d

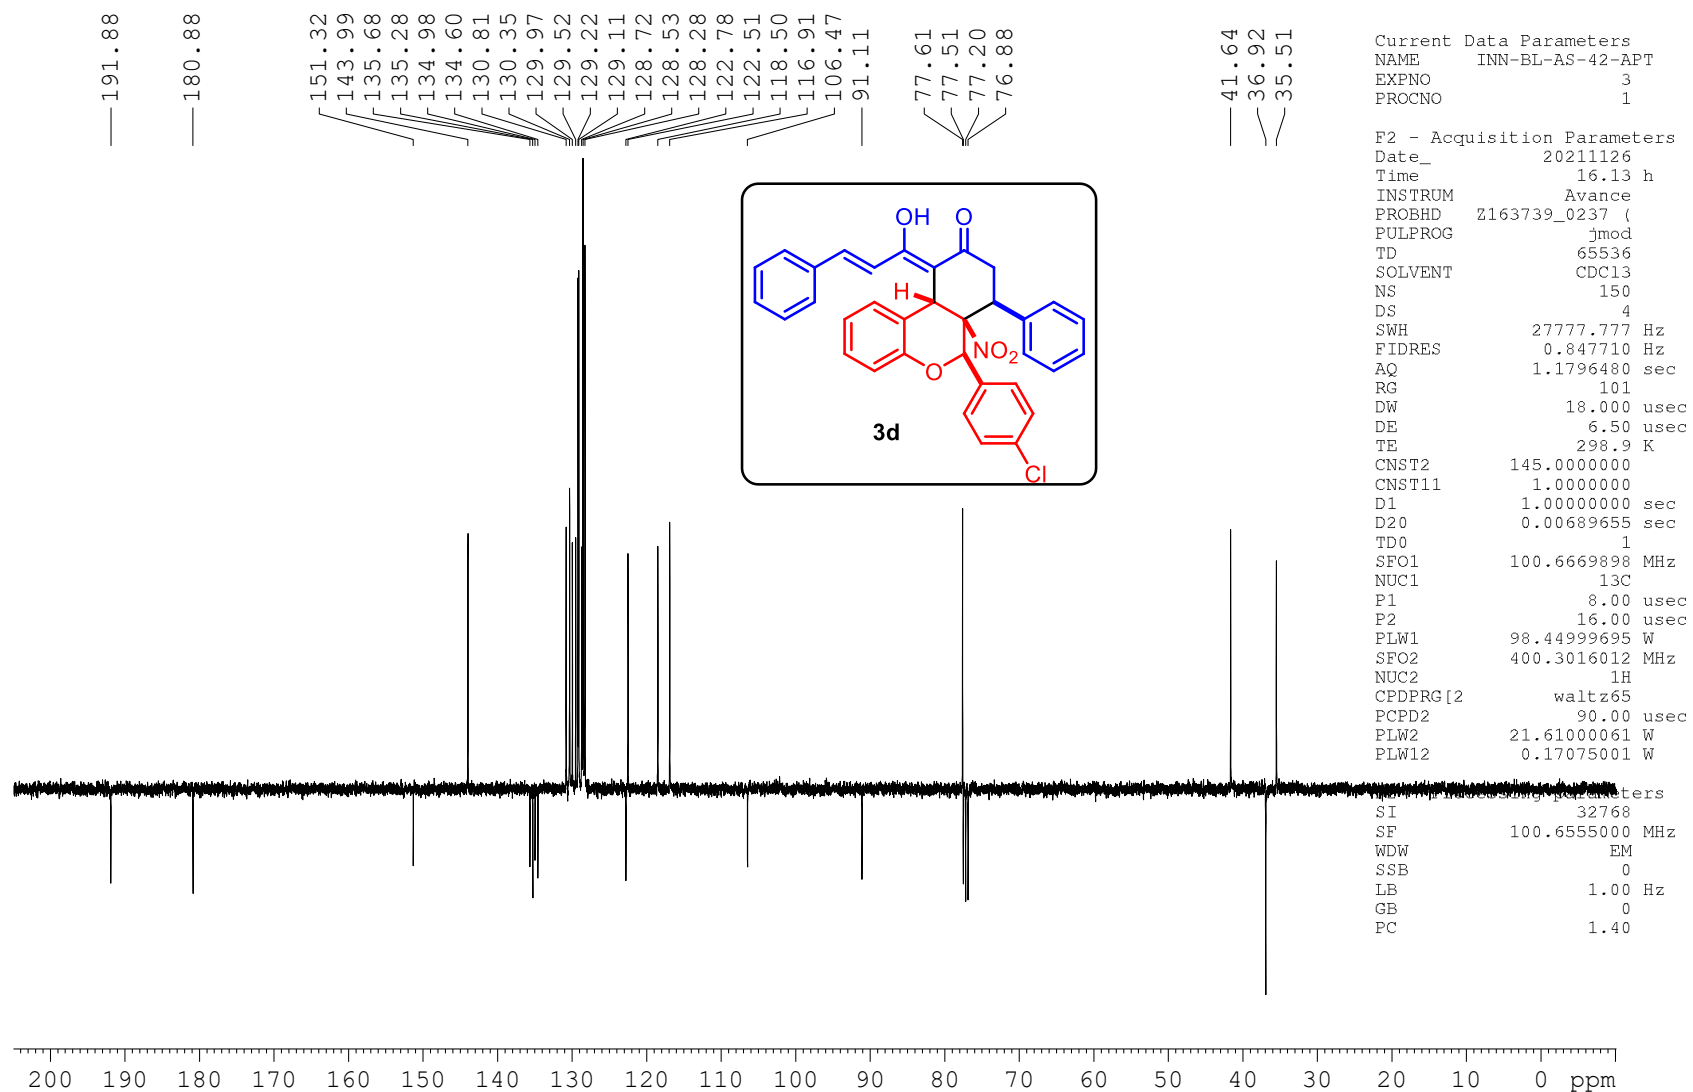

Figure S13. <sup>13</sup>C-APT NMR Spectrum of 3d



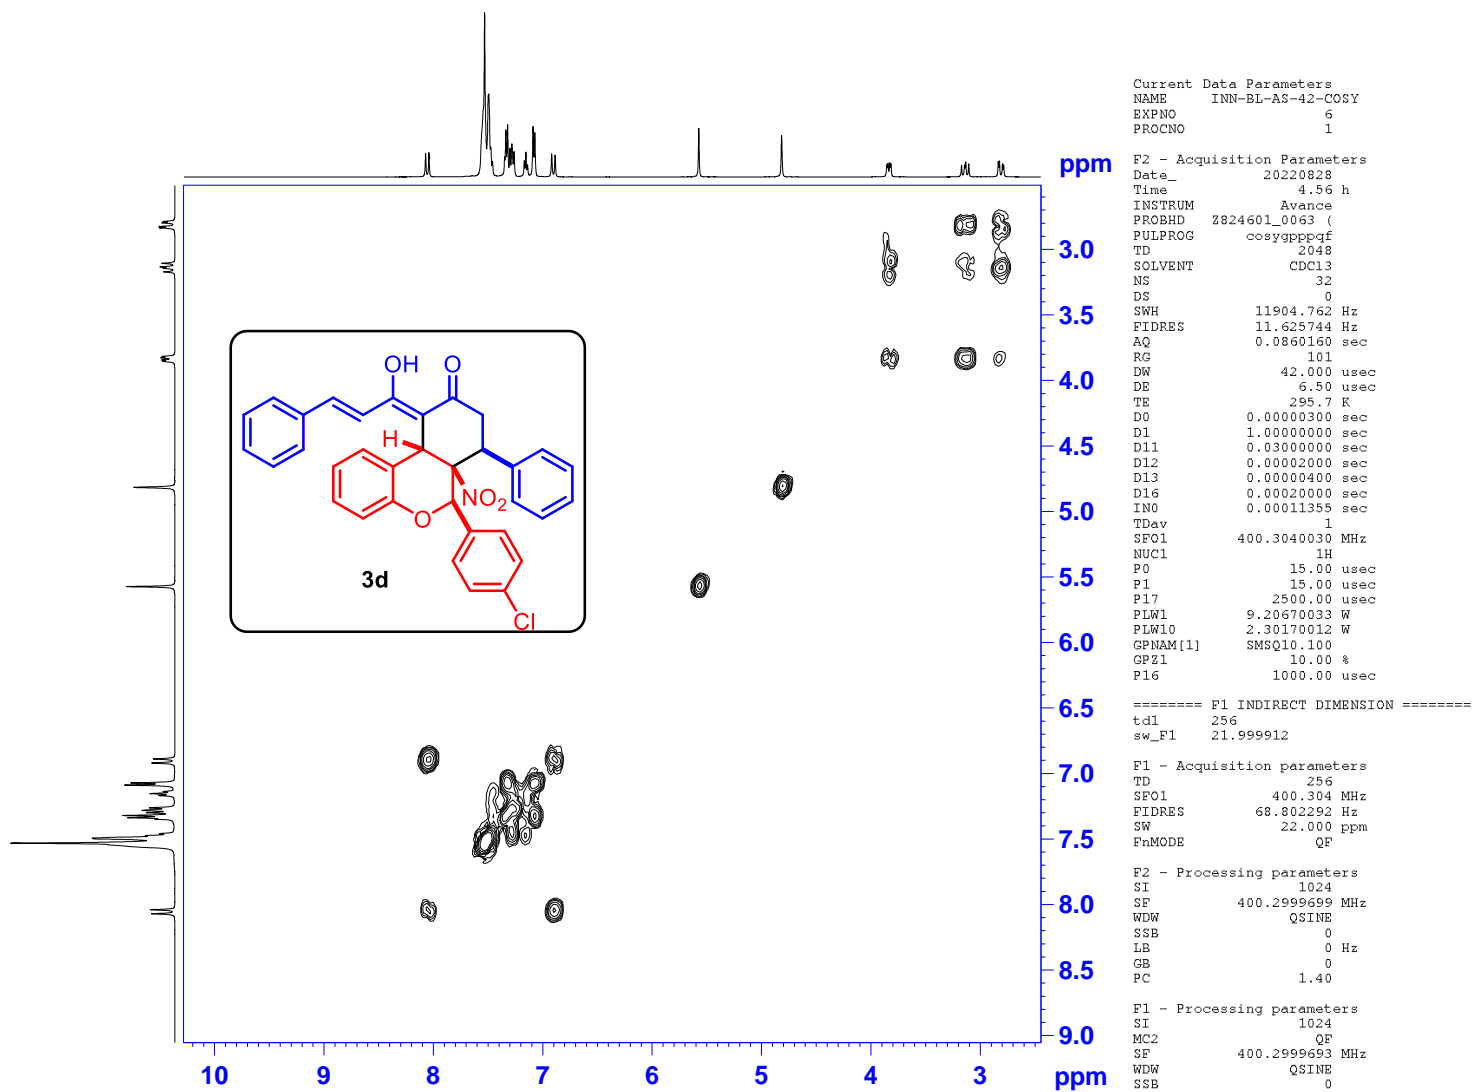

Figure S14.  $^1\text{H}$ - $^1\text{H}$  COSY NMR Spectrum of 3d

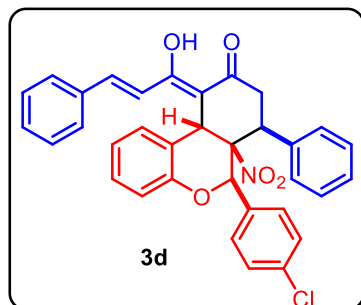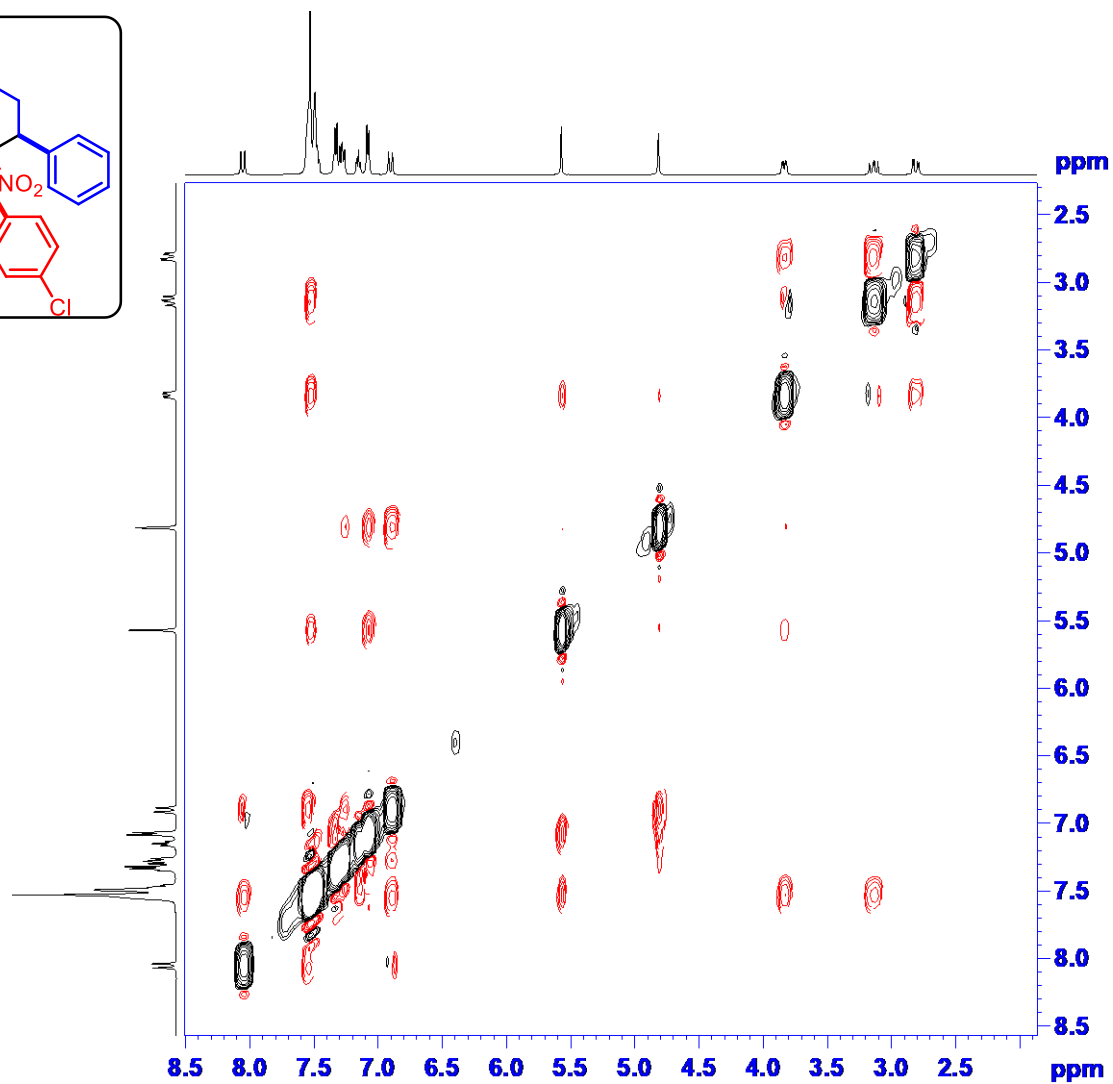

Current Data Parameters  
 NAME INN-BL-AS-42-NOESY  
 EXPNO 9  
 PROCNO 1

F2 - Acquisition Parameters  
 Date\_ 20220828  
 Time 8.47 h  
 INSTRUM Avance  
 PROBHD Z824601\_0063 (  
 PULPROG noesygpph  
 TD 2048  
 SOLVENT CDC13  
 NS 32  
 DS 0  
 SWH 11904.762 Hz  
 FIDRES 11.625744 Hz  
 AQ 0.0860160 sec  
 RG 101  
 DW 42.000 usec  
 DE 11.45 usec  
 TE 295.2 K  
 D0 0.00003768 sec  
 D1 1.00000000 sec  
 D8 0.60000002 sec  
 D16 0.00020000 sec  
 IN0 0.00011355 sec  
 TDav 1  
 SF01 400.304030 MHz  
 NUC1 1H  
 P1 15.00 usec  
 P2 30.00 usec  
 PLW1 9.20670033 W  
 GPNAM[1] SMSQ10.100  
 GPZ1 40.00 %  
 F16 1000.00 usec

===== F1 INDIRECT DIMENSION =====  
 tdl 256  
 sw\_F1 21.999884

F1 - Acquisition parameters  
 TD 256  
 SF01 400.304 MHz  
 FIDRES 68.802292 Hz  
 SW 22.000 ppm  
 FhMODE TPPI

F2 - Processing parameters  
 SI 1024  
 SF 400.2999696 MHz  
 WDW QSINE  
 SSB 2  
 LB 0 Hz  
 GB 0  
 PC 1.00

F1 - Processing parameters  
 SI 1024  
 MC2 TPPI  
 SF 400.2999679 MHz  
 WDW QSINE  
 SSB 2  
 LB 0 Hz  
 GB 0

Figure S15.  $^1\text{H}$ - $^1\text{H}$  NOESY NMR Spectrum of 3d

Current Data Parameters  
 NAME INN-BL-AS-56-1H  
 EXPNO 18  
 PROCNO 1

F2 - Acquisition Parameters  
 Date\_ 20211221  
 Time 18.58 h  
 INSTRUM Avance Neo 400  
 PROBHD Z163739\_0226 (  
 PULPROG zg30  
 TD 51724  
 SOLVENT CDCl3  
 NS 18  
 DS 0  
 SWH 11904.762 Hz  
 FIDRES 0.460319 Hz  
 AQ 2.1724081 sec  
 RG 101  
 DW 42.000 usec  
 DE 9.14 usec  
 TE 295.9 K  
 D1 1.00000000 sec  
 TD0 1  
 SFO1 400.1324708 MHz  
 NUC1 1H  
 P0 2.67 usec  
 P1 8.00 usec  
 PLW1 25.07999992 W

F2 - Processing parameters  
 SI 65536  
 SF 400.1300099 MHz  
 WDW EM  
 SSB 0  
 LB 0.30 Hz  
 GB 0  
 PC 1.00

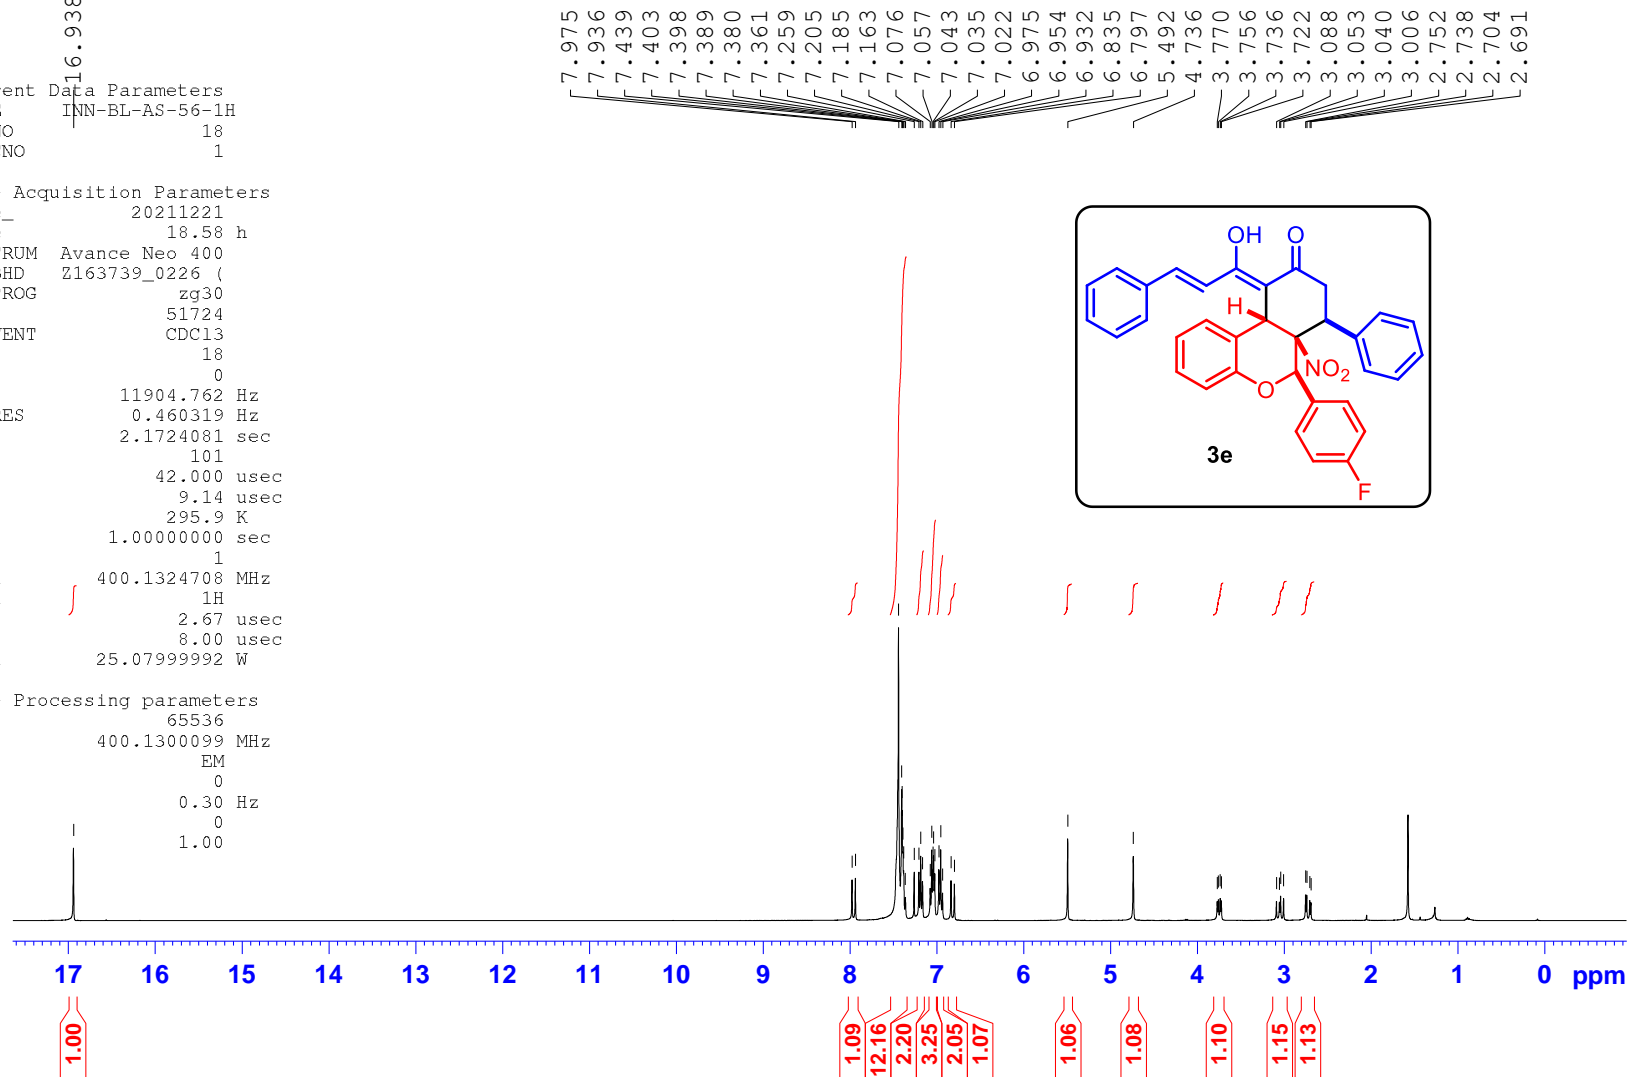

Figure S16. <sup>1</sup>H NMR Spectrum of 3e

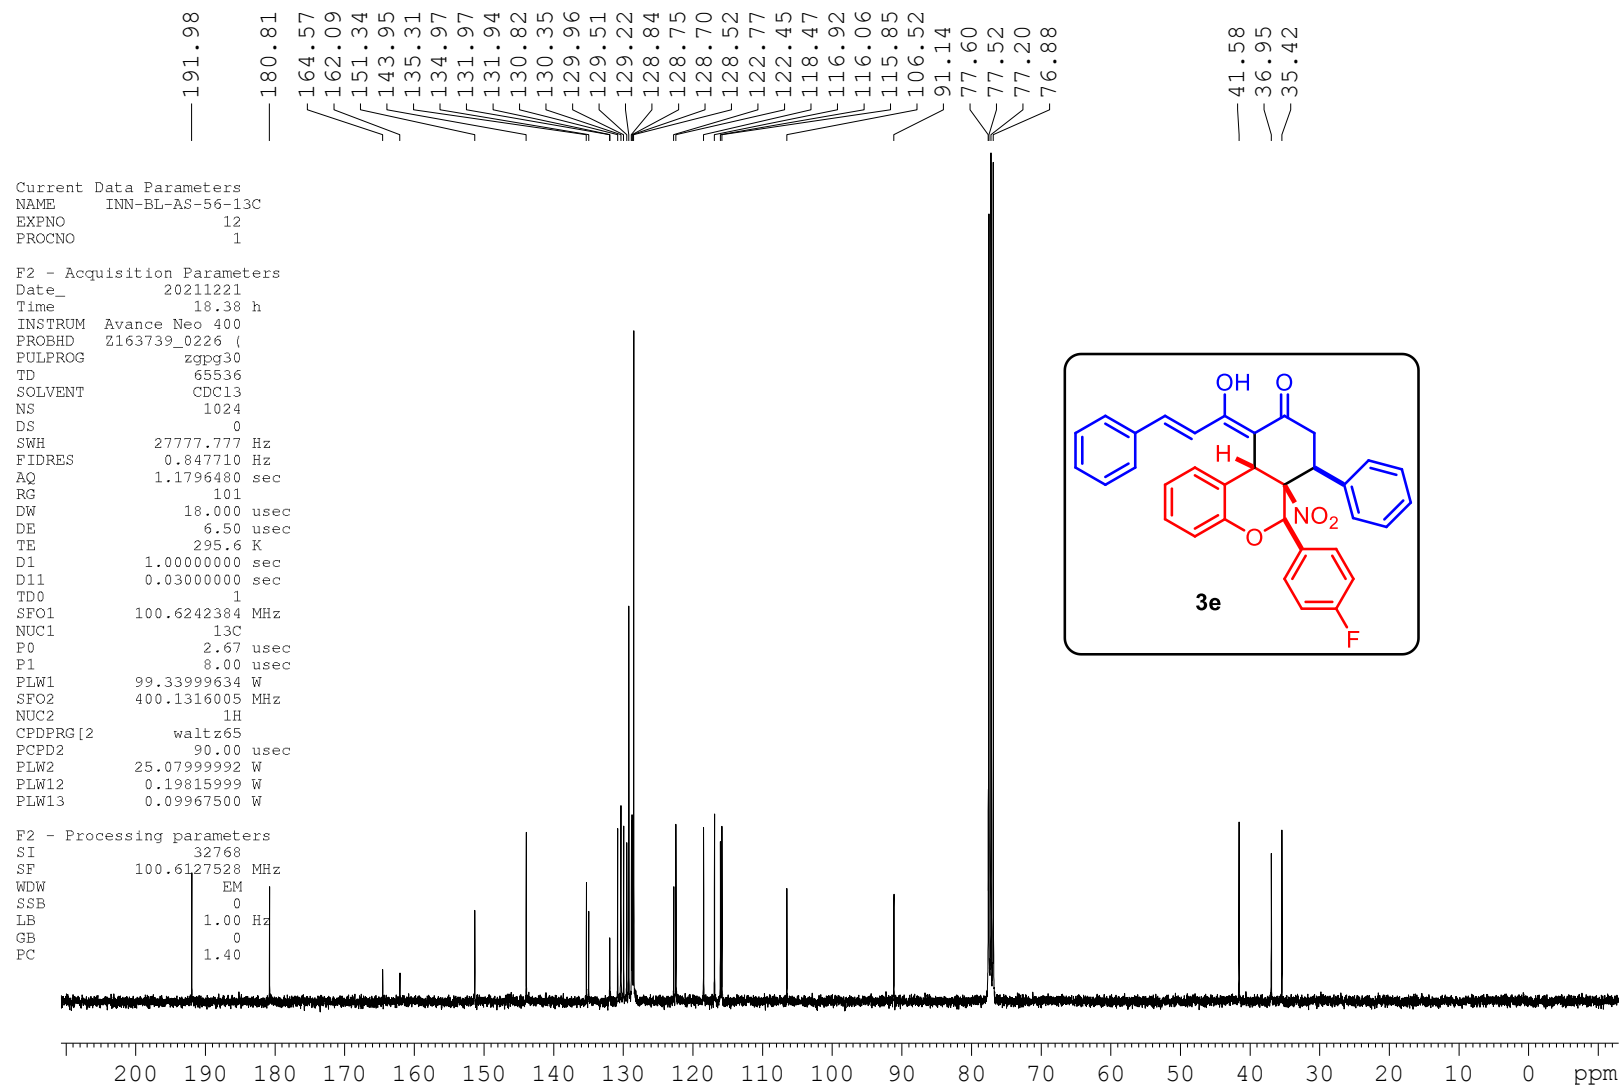

Figure S17.  $^{13}\text{C}$  NMR Spectrum of 3e

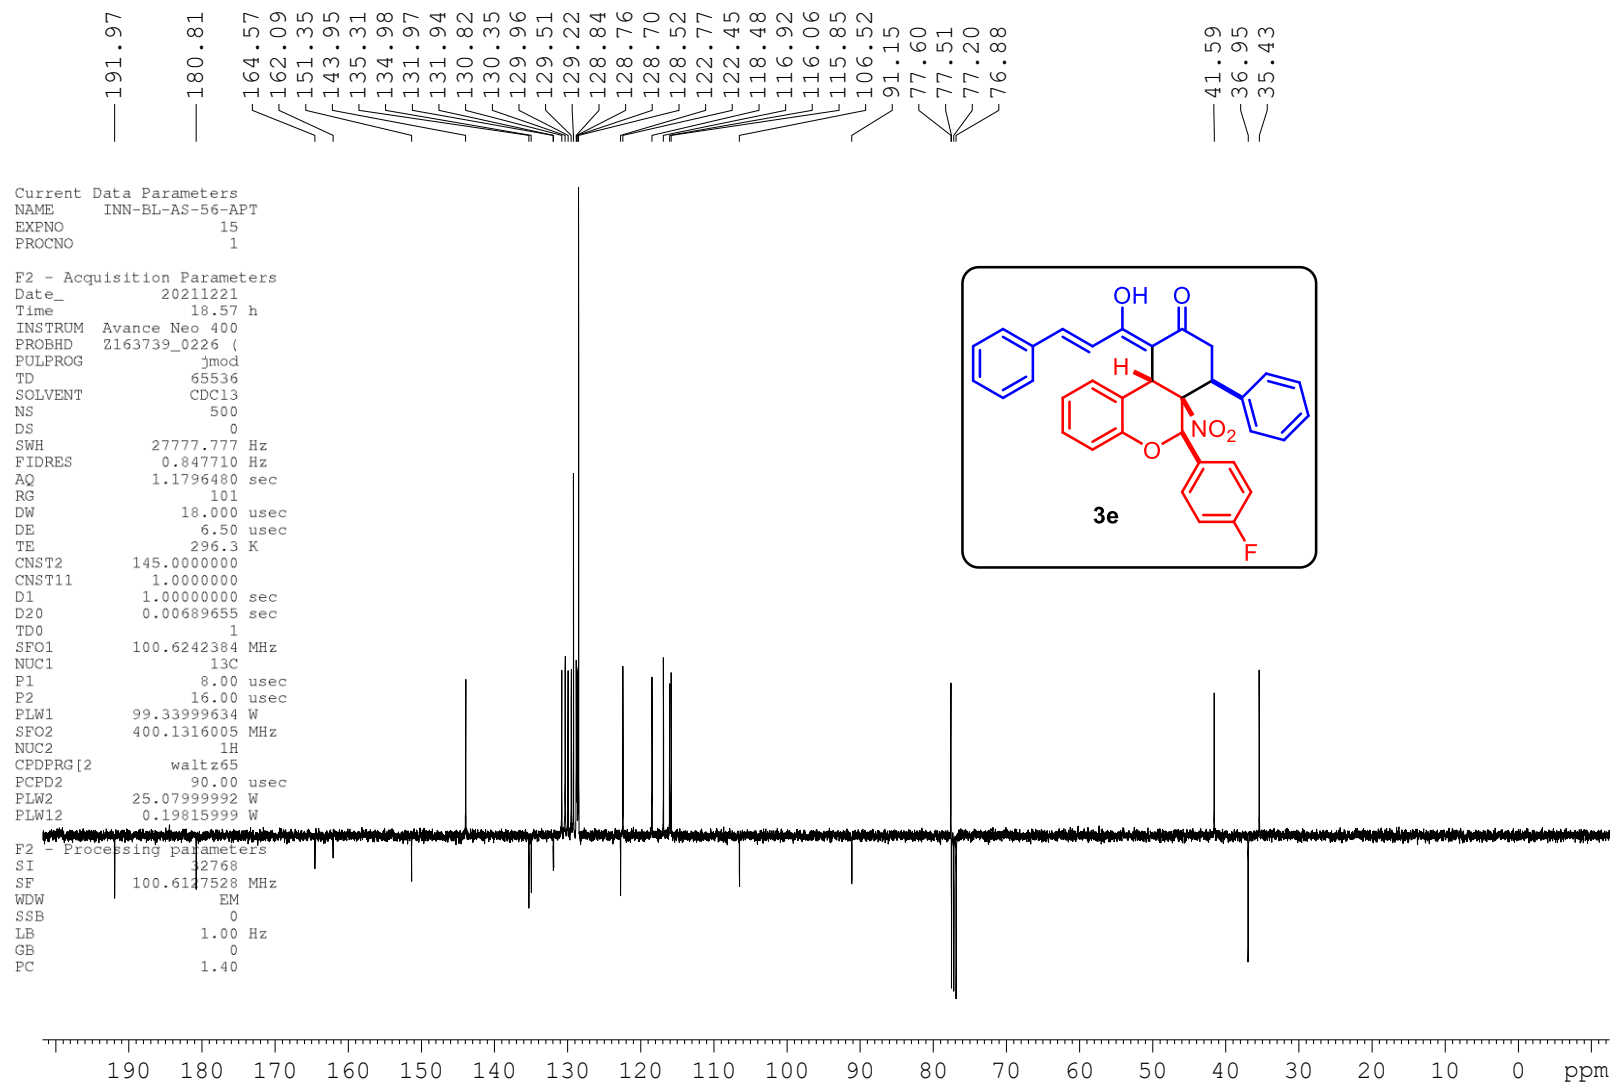

Figure S18. <sup>13</sup>C-APT NMR Spectrum of 3e

Current Data Parameters  
NAME INN-BL-AS-56-19F  
EXPNO 21  
PROCNO 1

F2 - Acquisition Parameters  
Date\_ 20211221  
Time 19.03 h  
INSTRUM Avance Neo 400  
PROBHD Z163739\_0226 (   
PULPROG zgig  
TD 131072  
SOLVENT CDC13  
NS 162  
DS 4  
SWH 166666.672 Hz  
FIDRES 2.543132 Hz  
AQ 0.3932160 sec  
RG 101  
DW 3.000 usec  
DE 6.50 usec  
TE 295.7 K  
D1 1.00000000 sec  
D11 0.03000000 sec  
TD0 1  
SFO1 376.4795413 MHz  
NUC1 19F  
P1 12.00 usec  
PLW1 31.08799934 W  
SFO2 400.1316005 MHz  
NUC2 1H  
CPDPRG[2] waltz16  
PCPD2 90.00 usec  
PLW2 25.07999992 W  
PLW12 0.19815999 W

F2 - Processing parameters  
SI 65536  
SF 376.4983662 MHz  
WDW EM  
SSB 0  
LB 1.00 Hz  
GB 0  
PC 1.00

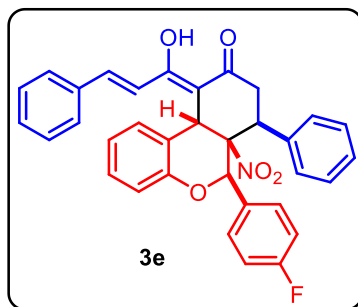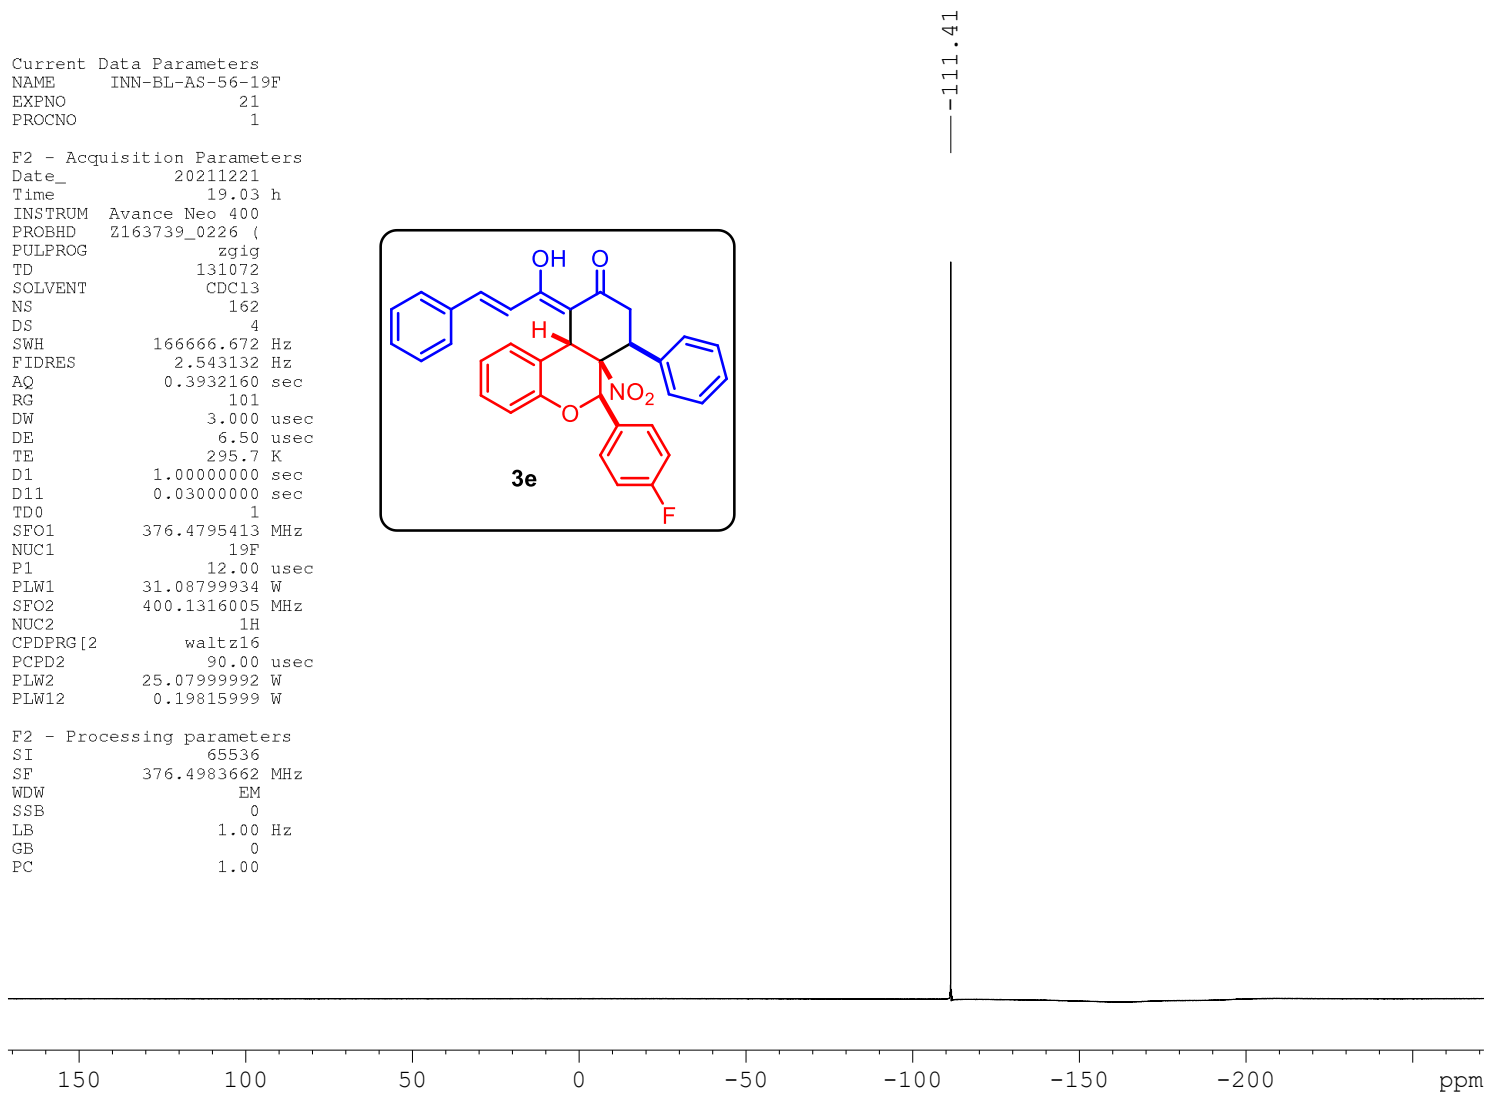

Figure S19. <sup>19</sup>F NMR Spectrum of 3e

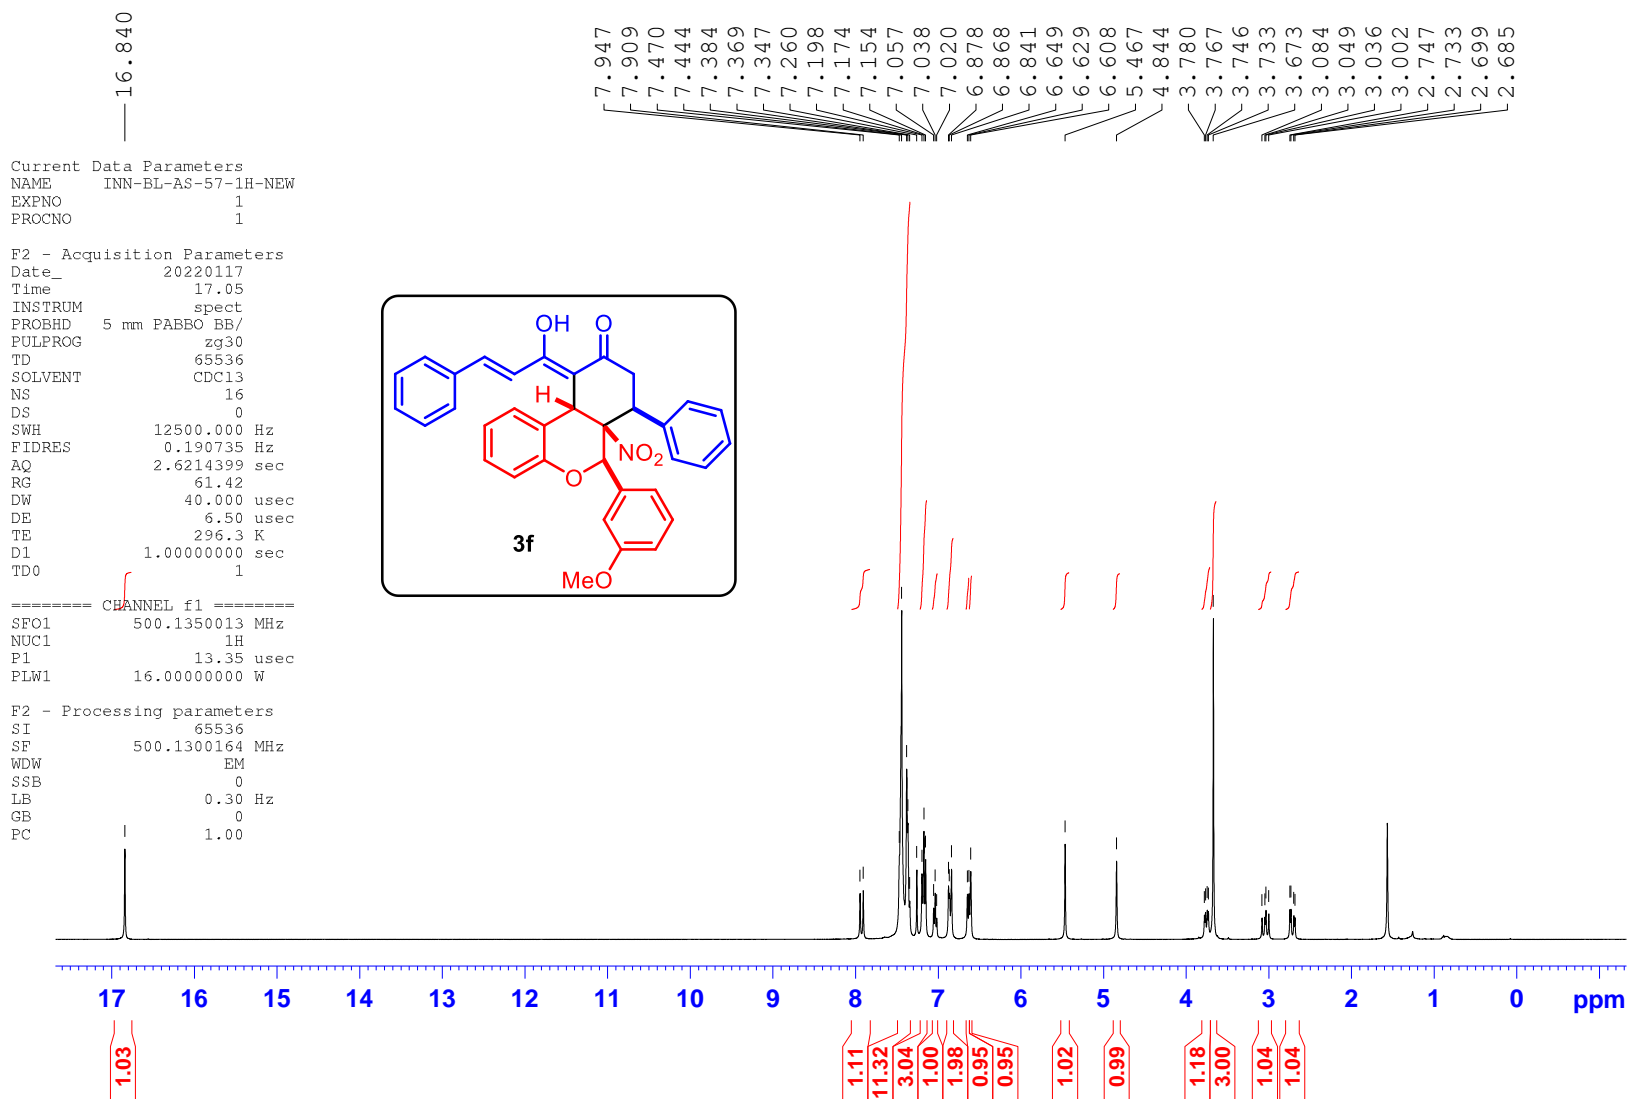

Figure S20. <sup>1</sup>H NMR Spectrum of 3f

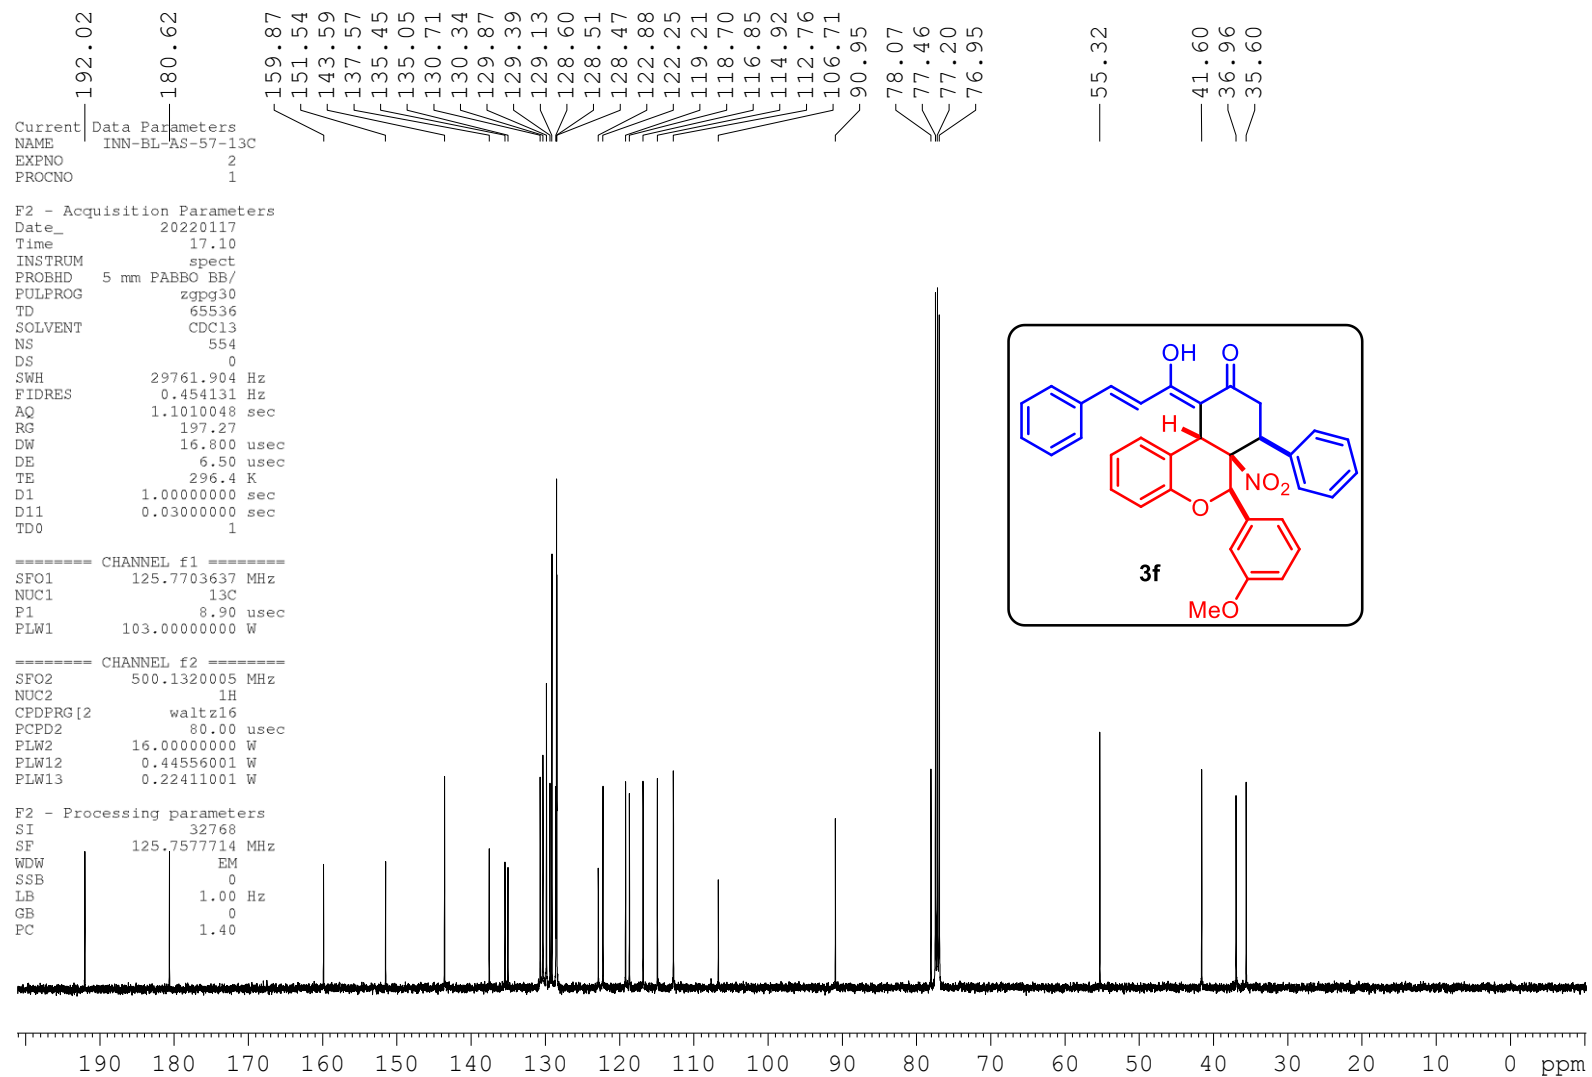

Figure S21. <sup>13</sup>C NMR Spectrum of 3f



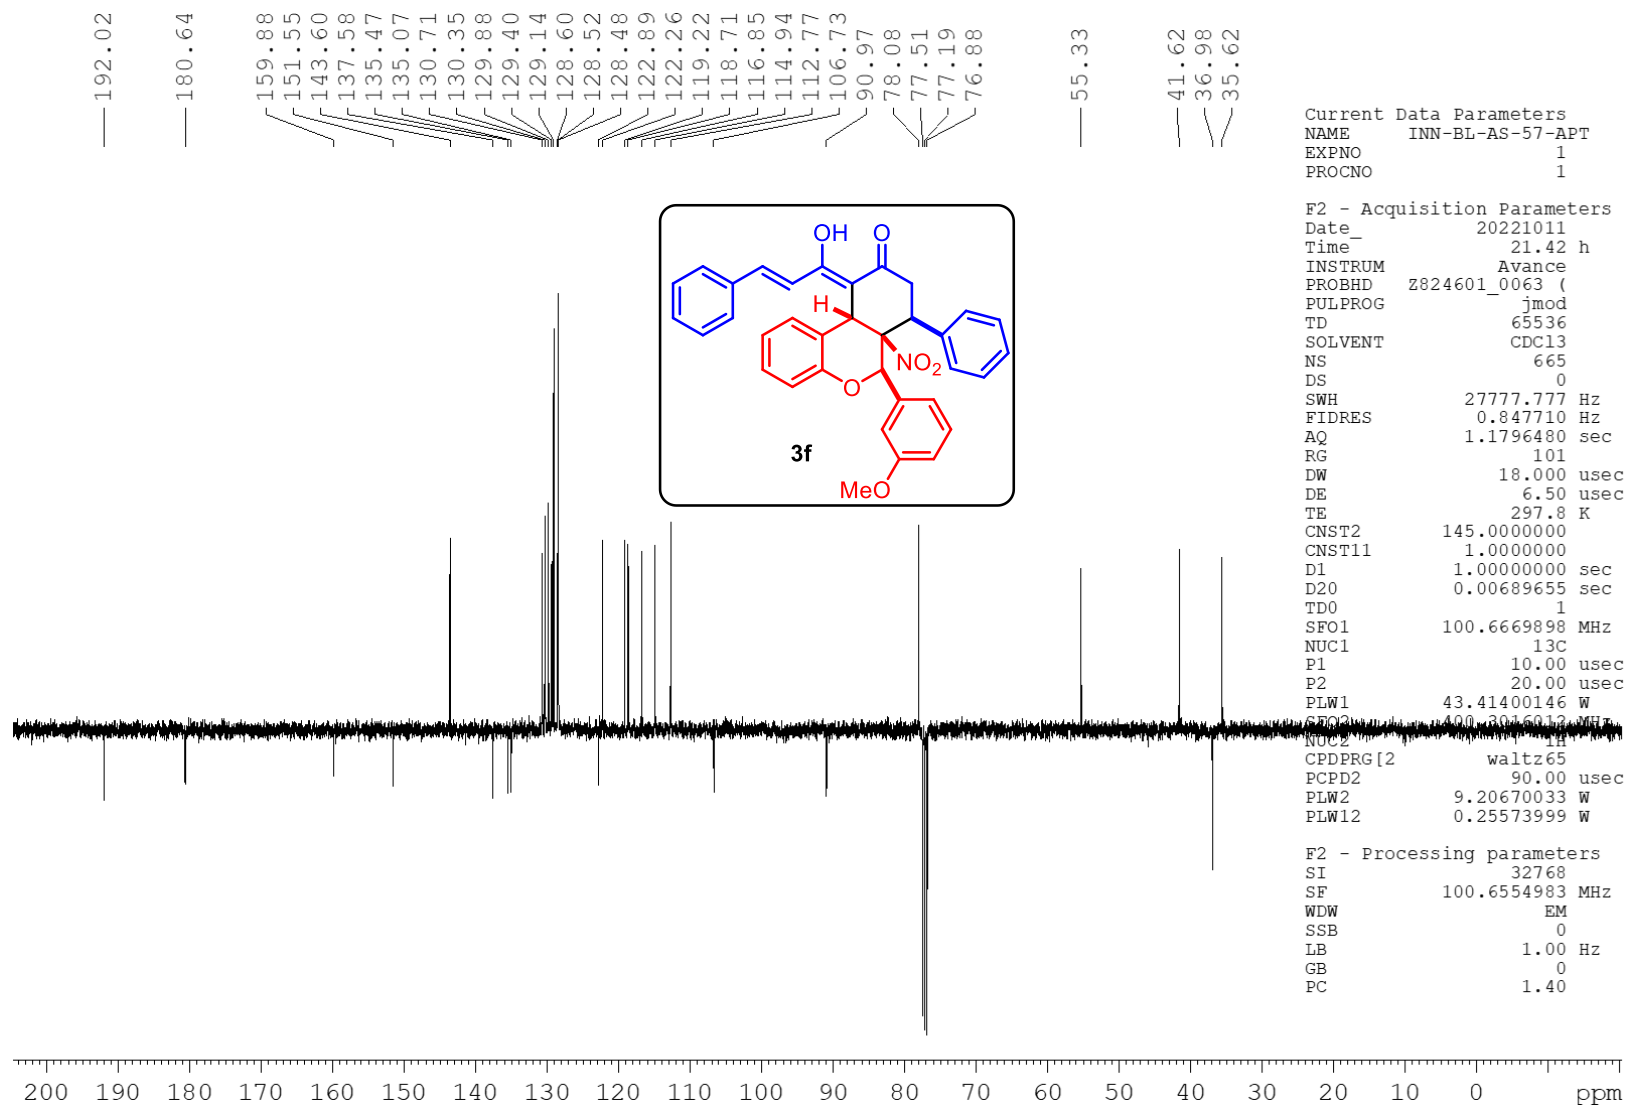

Figure S22. <sup>13</sup>C-APT Spectrum of **3f**

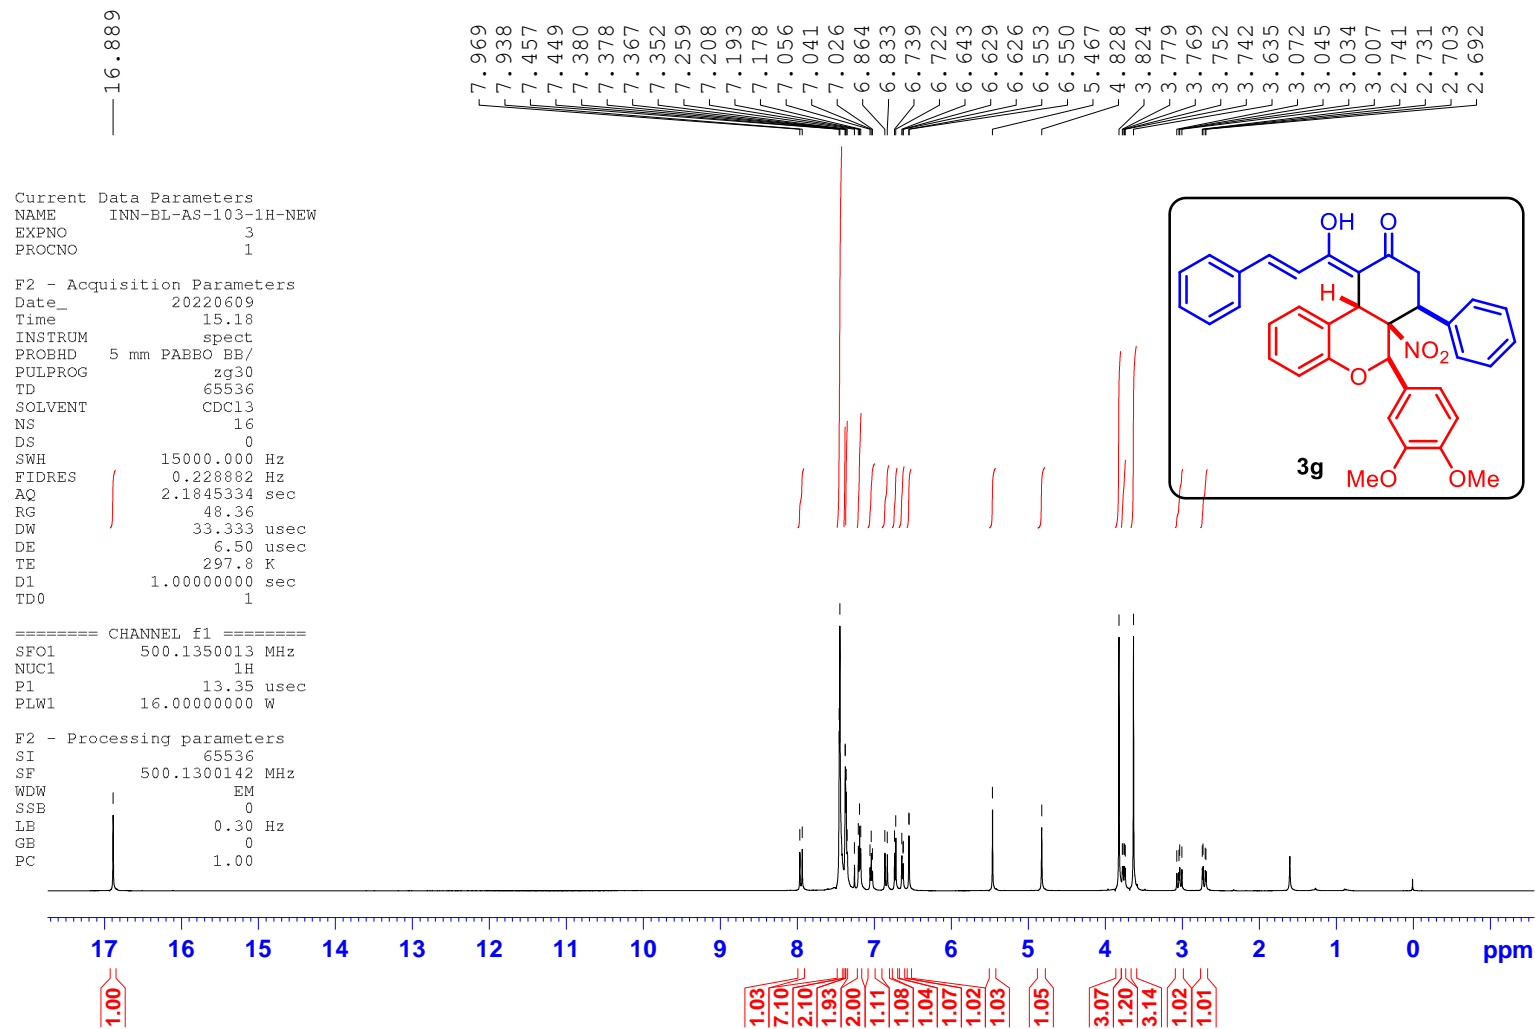

Figure S23. <sup>1</sup>H NMR Spectrum of 3g

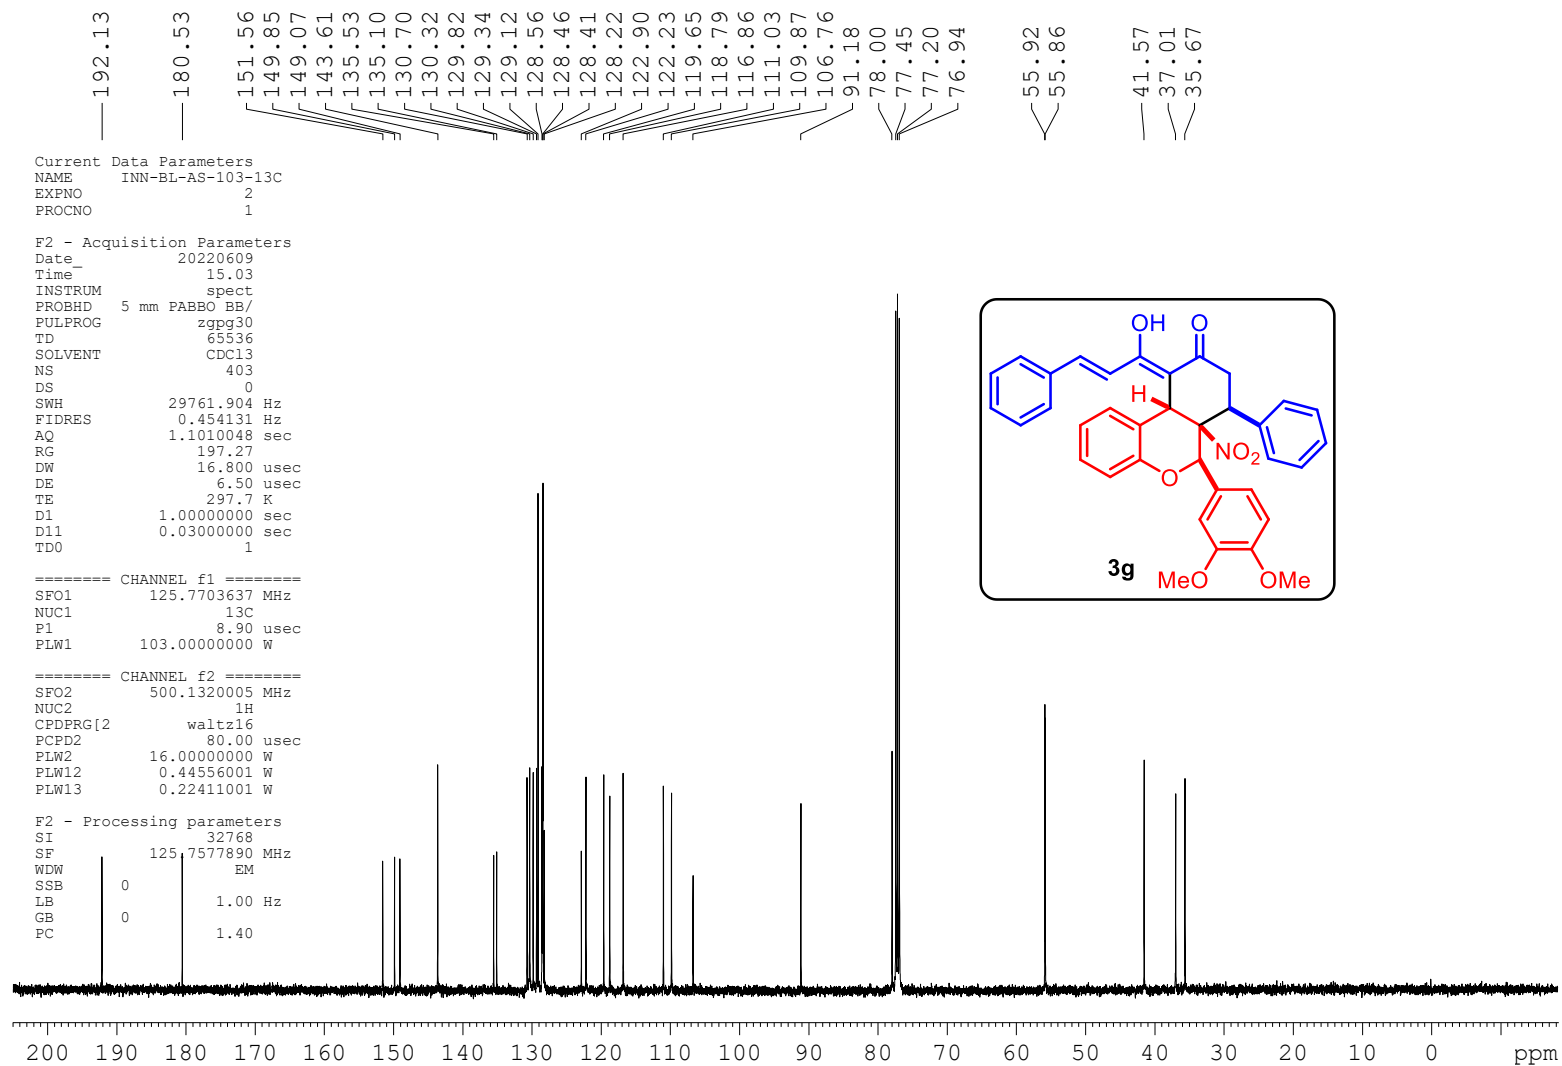

Figure S24. <sup>13</sup>C NMR Spectrum of 3g

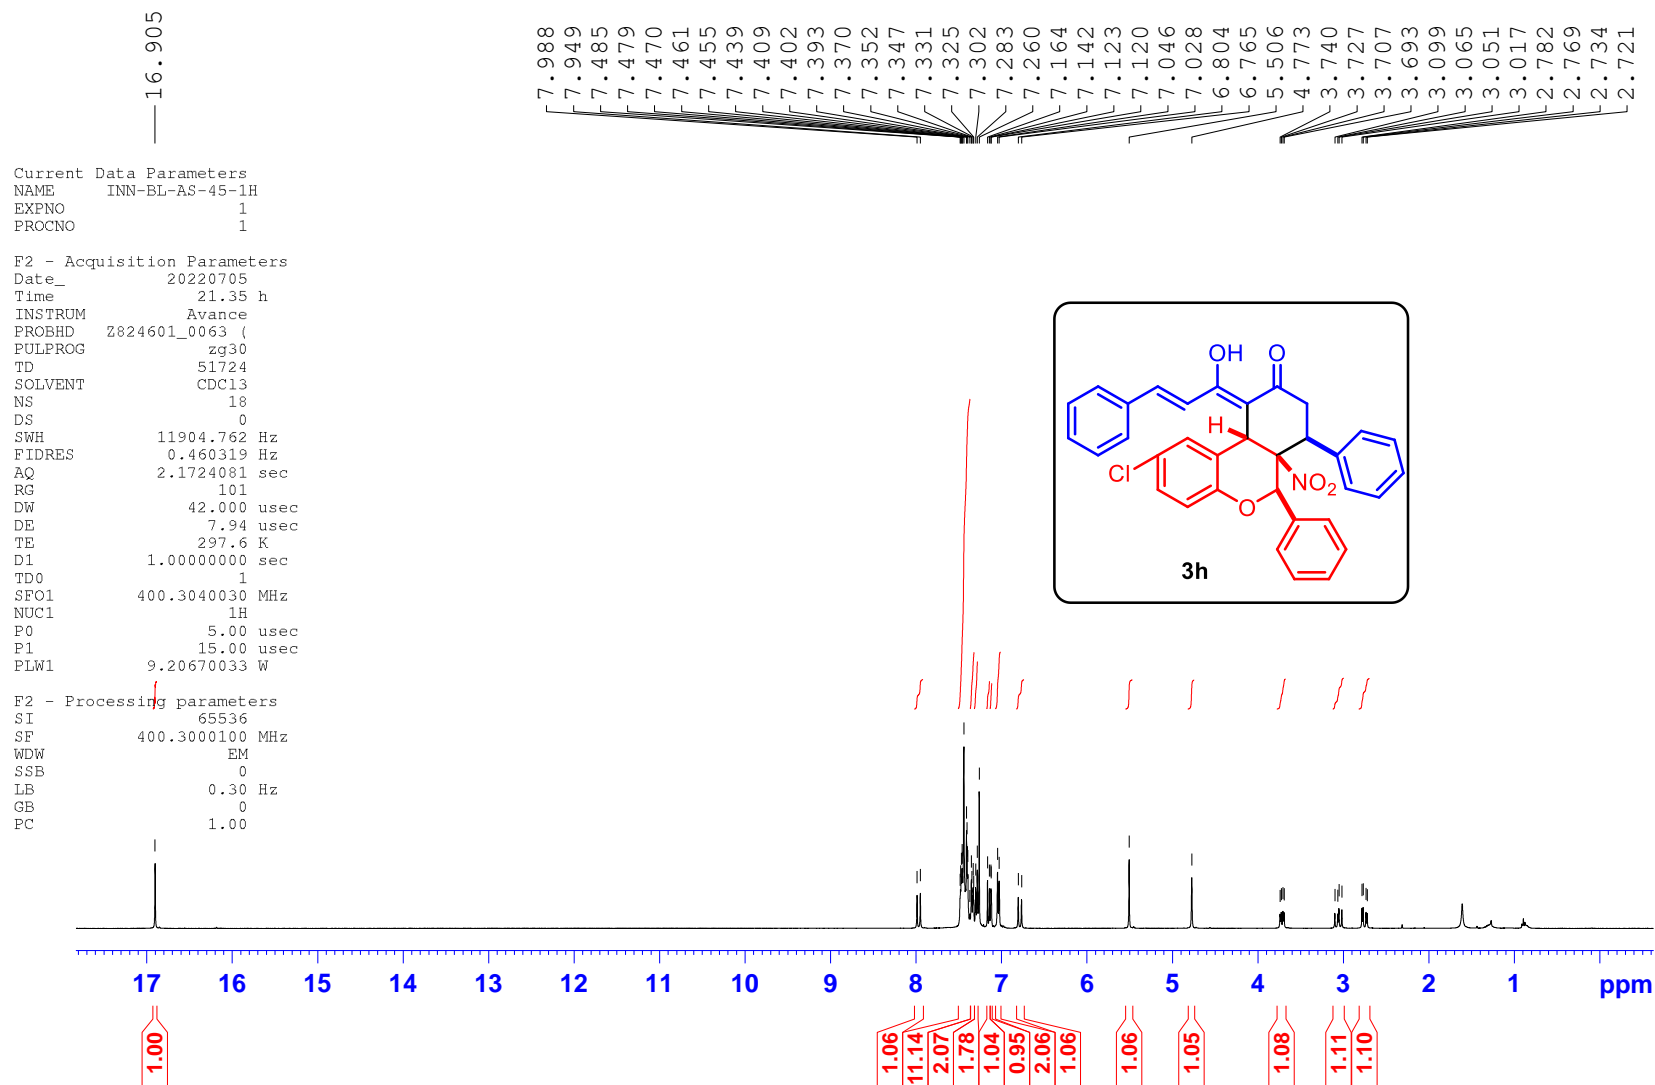

Figure S25. <sup>1</sup>H NMR Spectrum of 3h

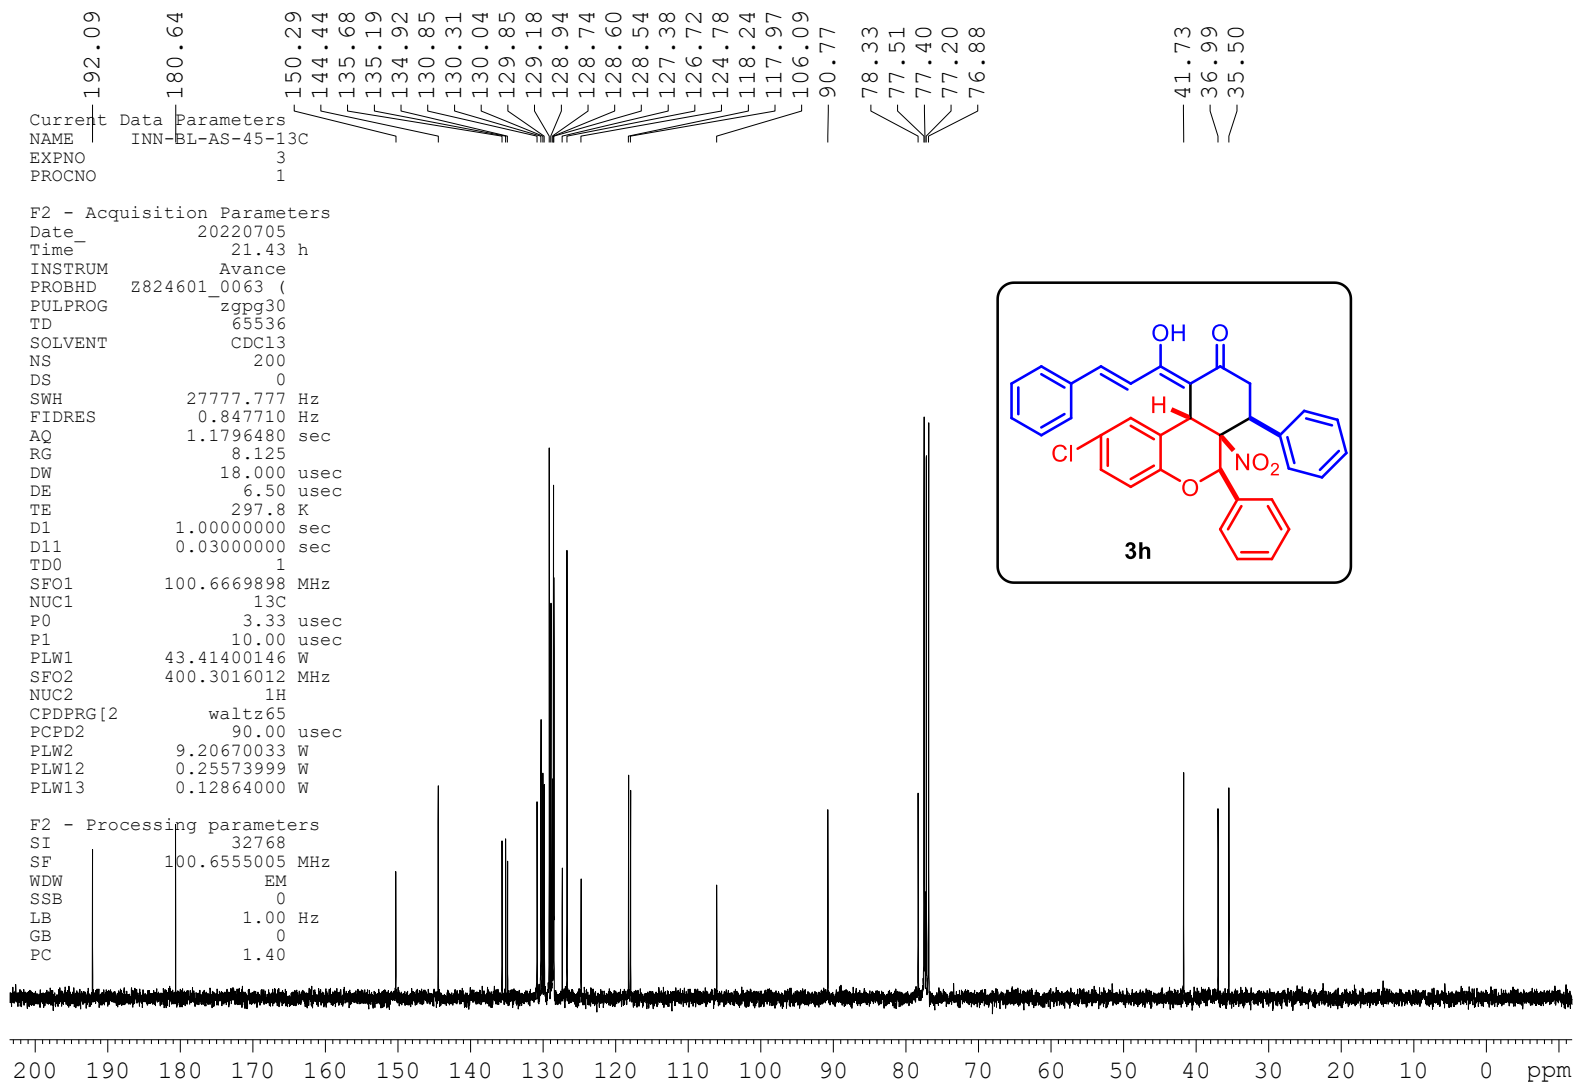

Figure S26. <sup>13</sup>C NMR Spectrum of 3h

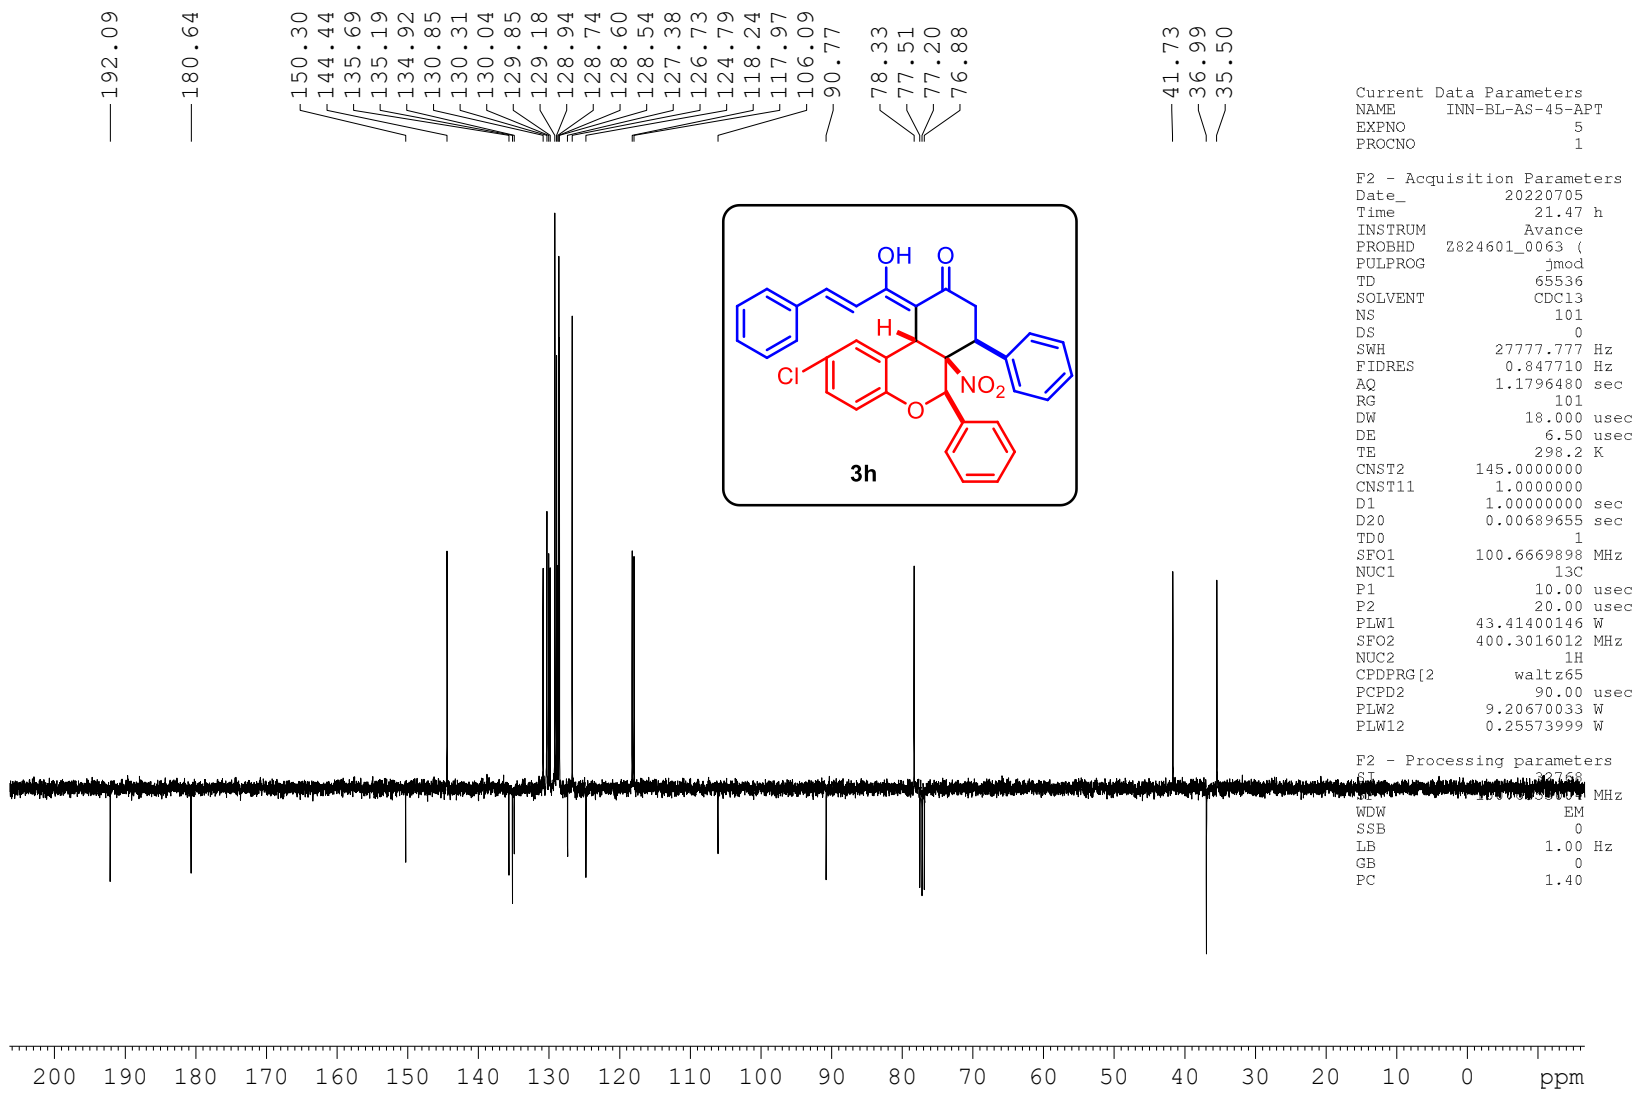

Figure S27. <sup>13</sup>C-APT NMR Spectrum of 3h

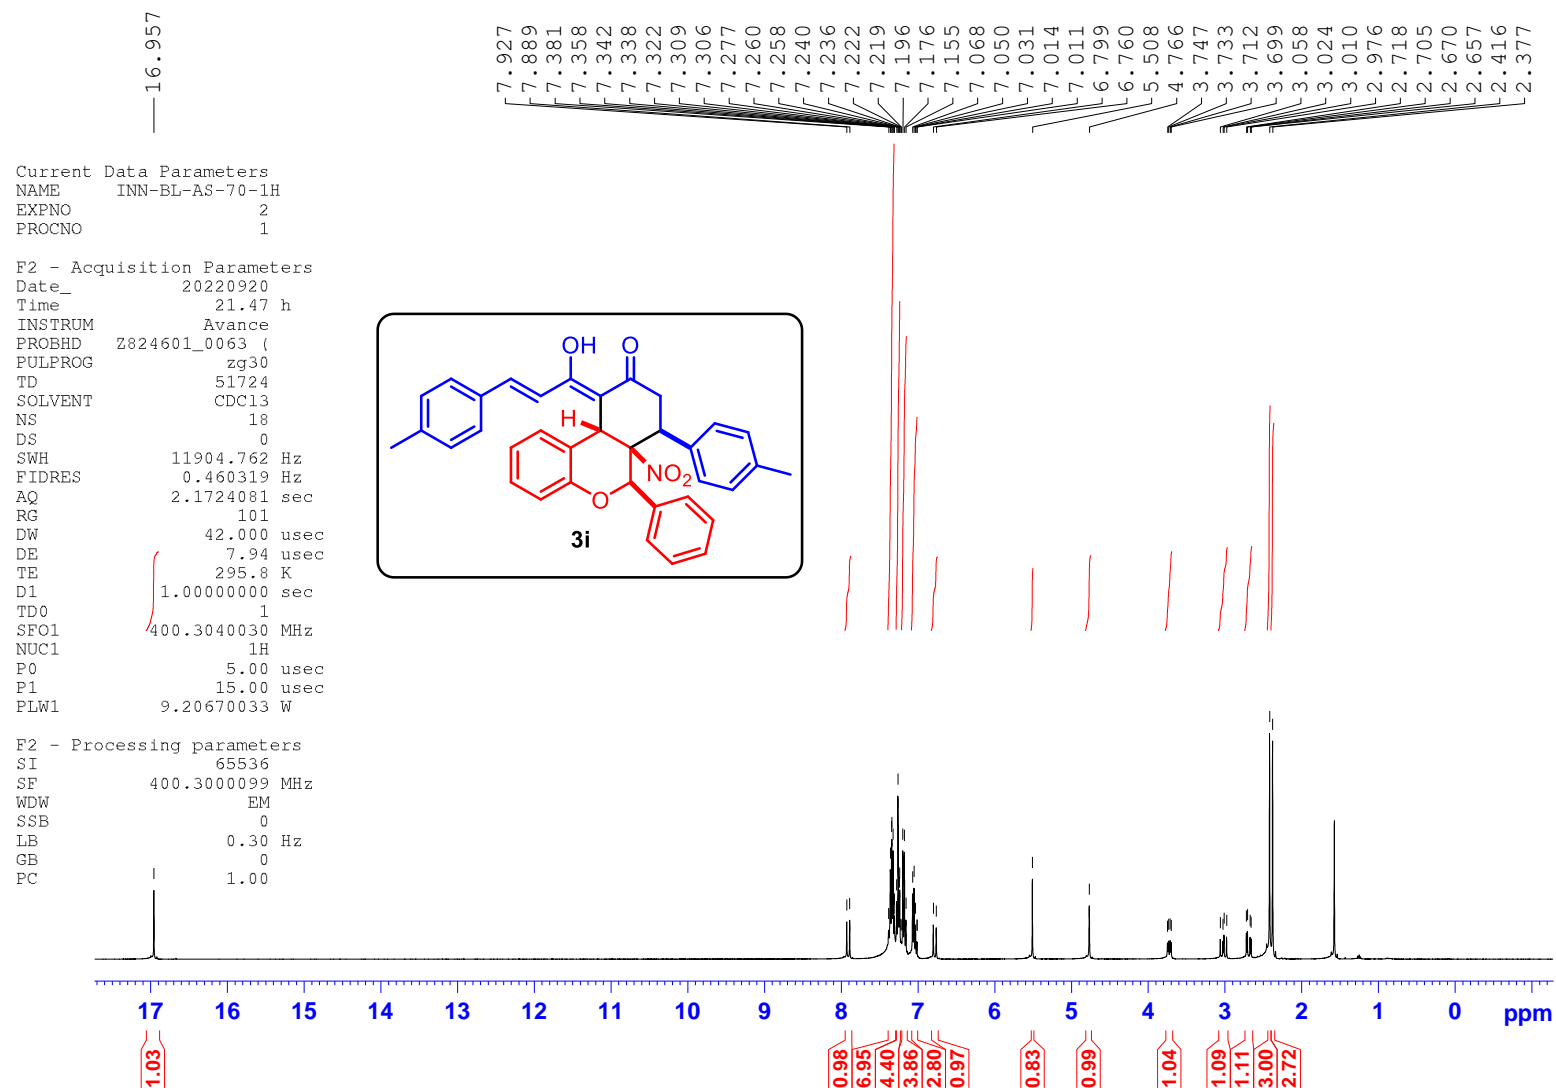

Figure S28. <sup>1</sup>H NMR Spectrum of 3i

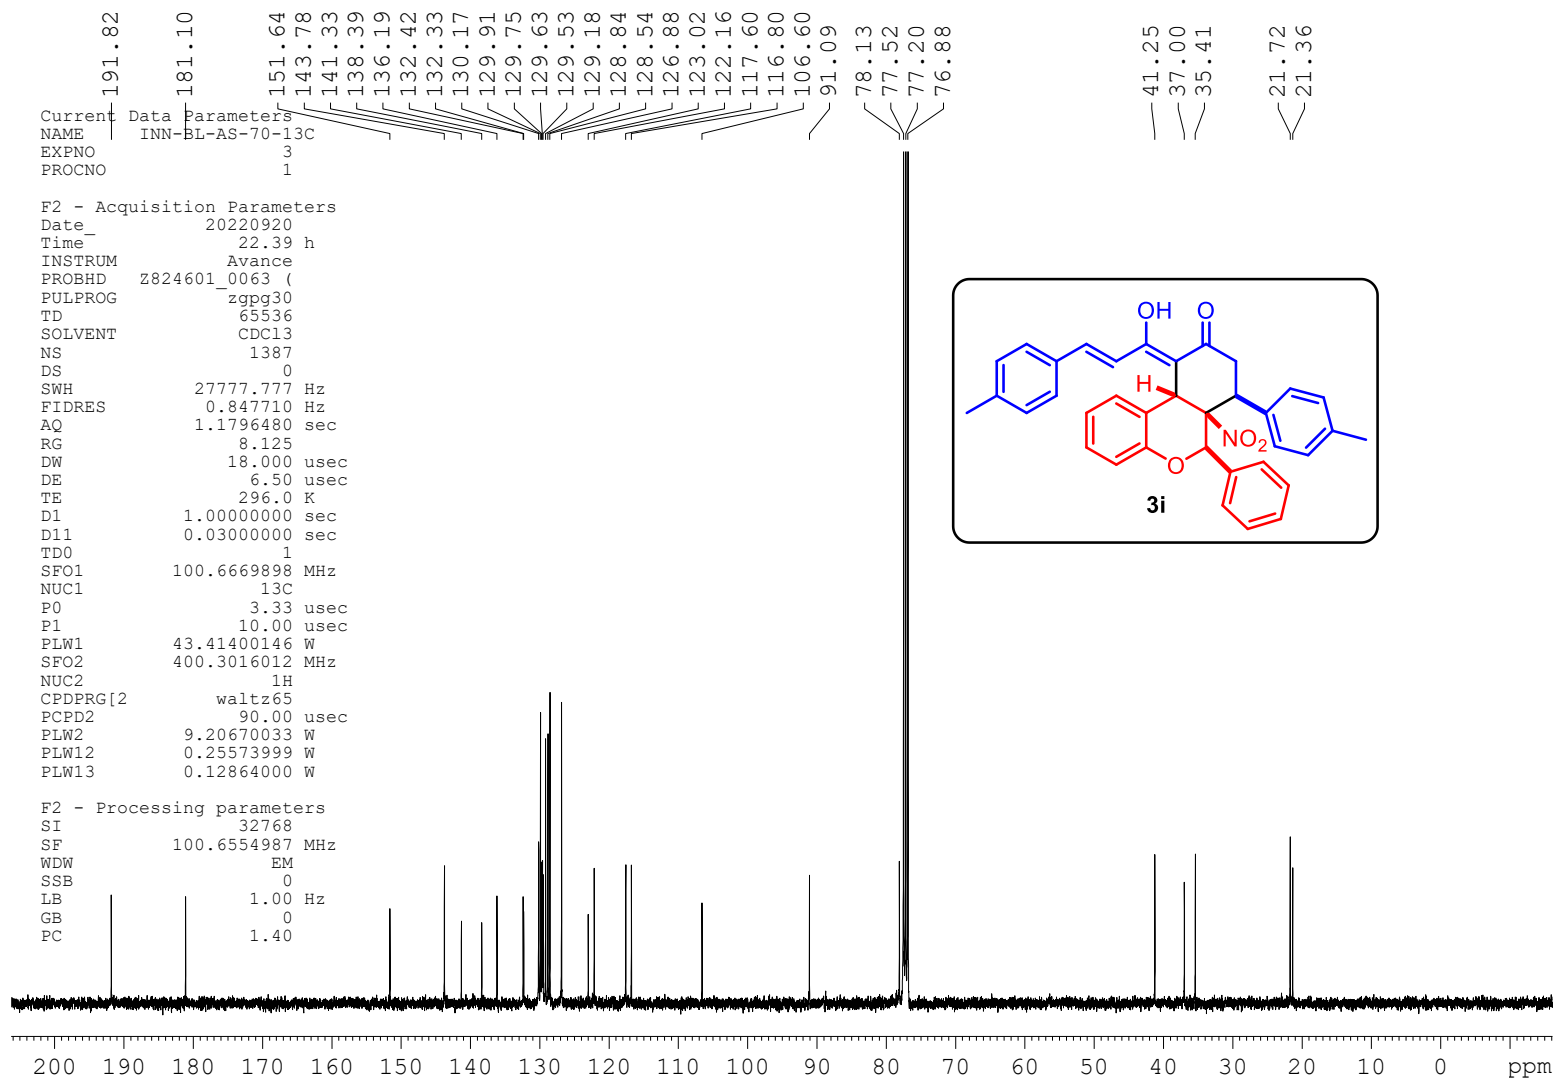

Figure S29. <sup>13</sup>C NMR Spectrum of **3i**



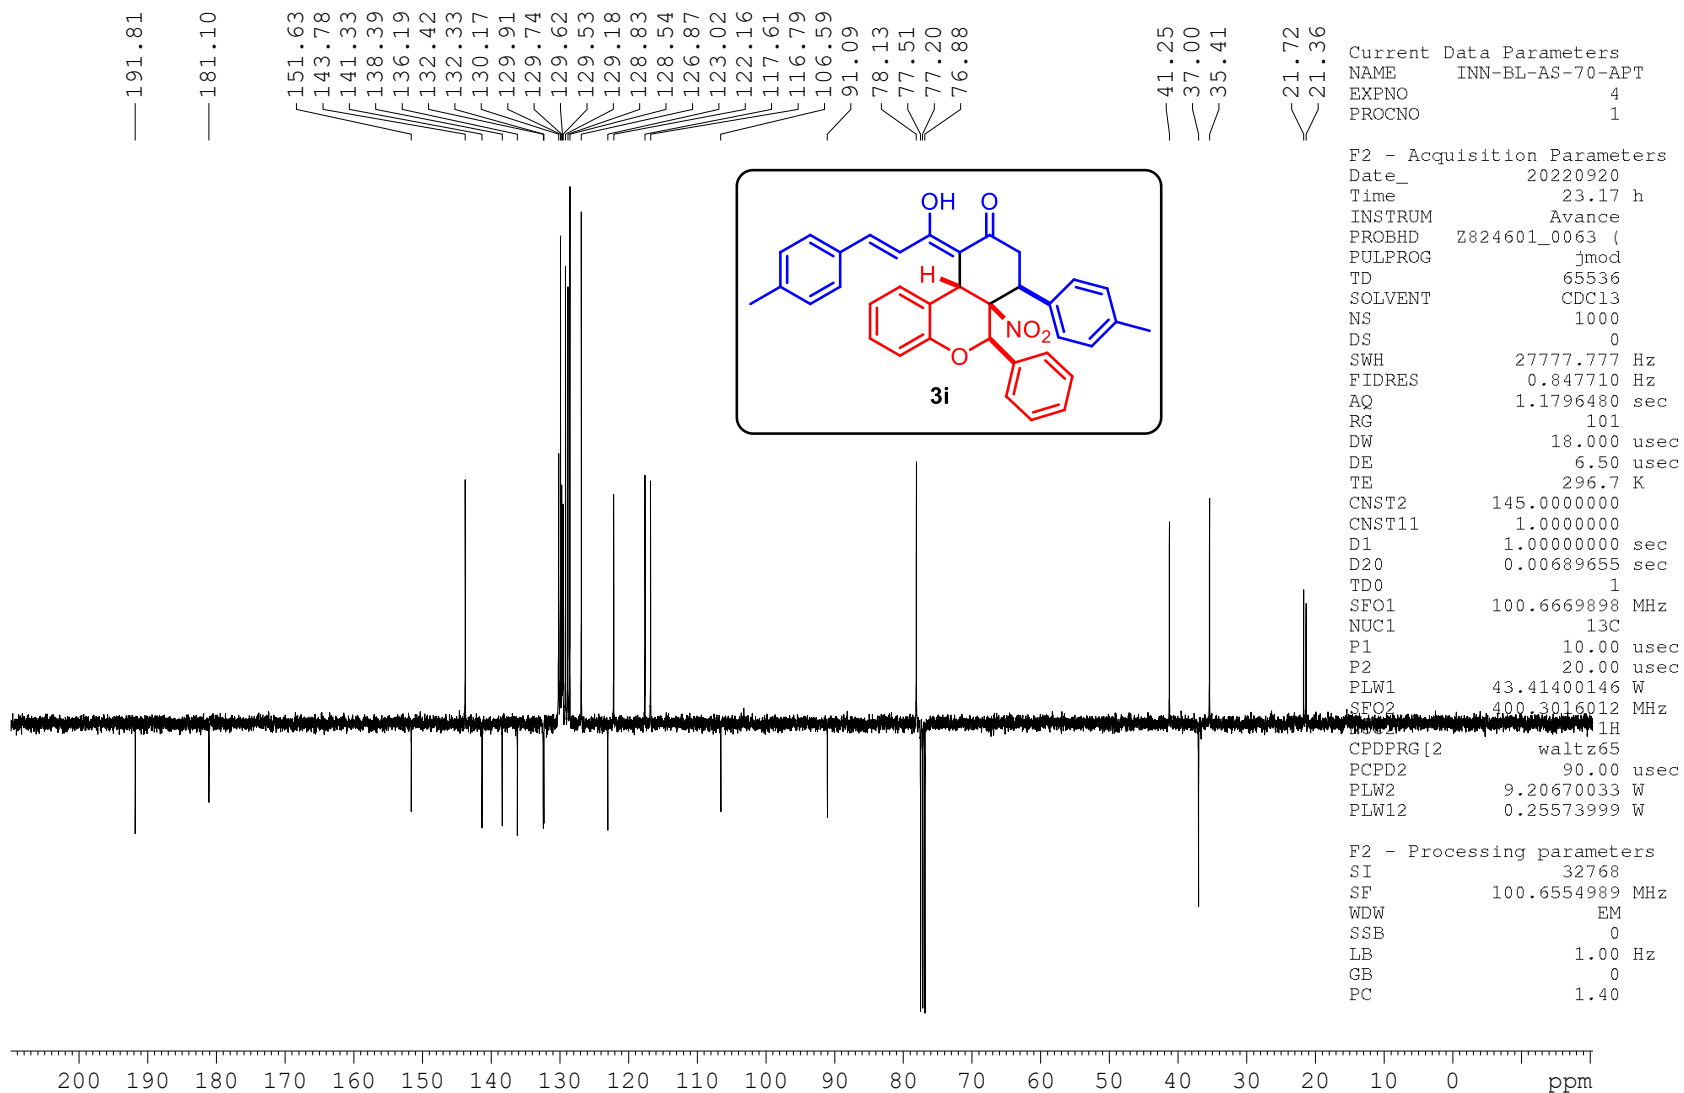

Figure S30. <sup>13</sup>C-APT Spectrum of 3i

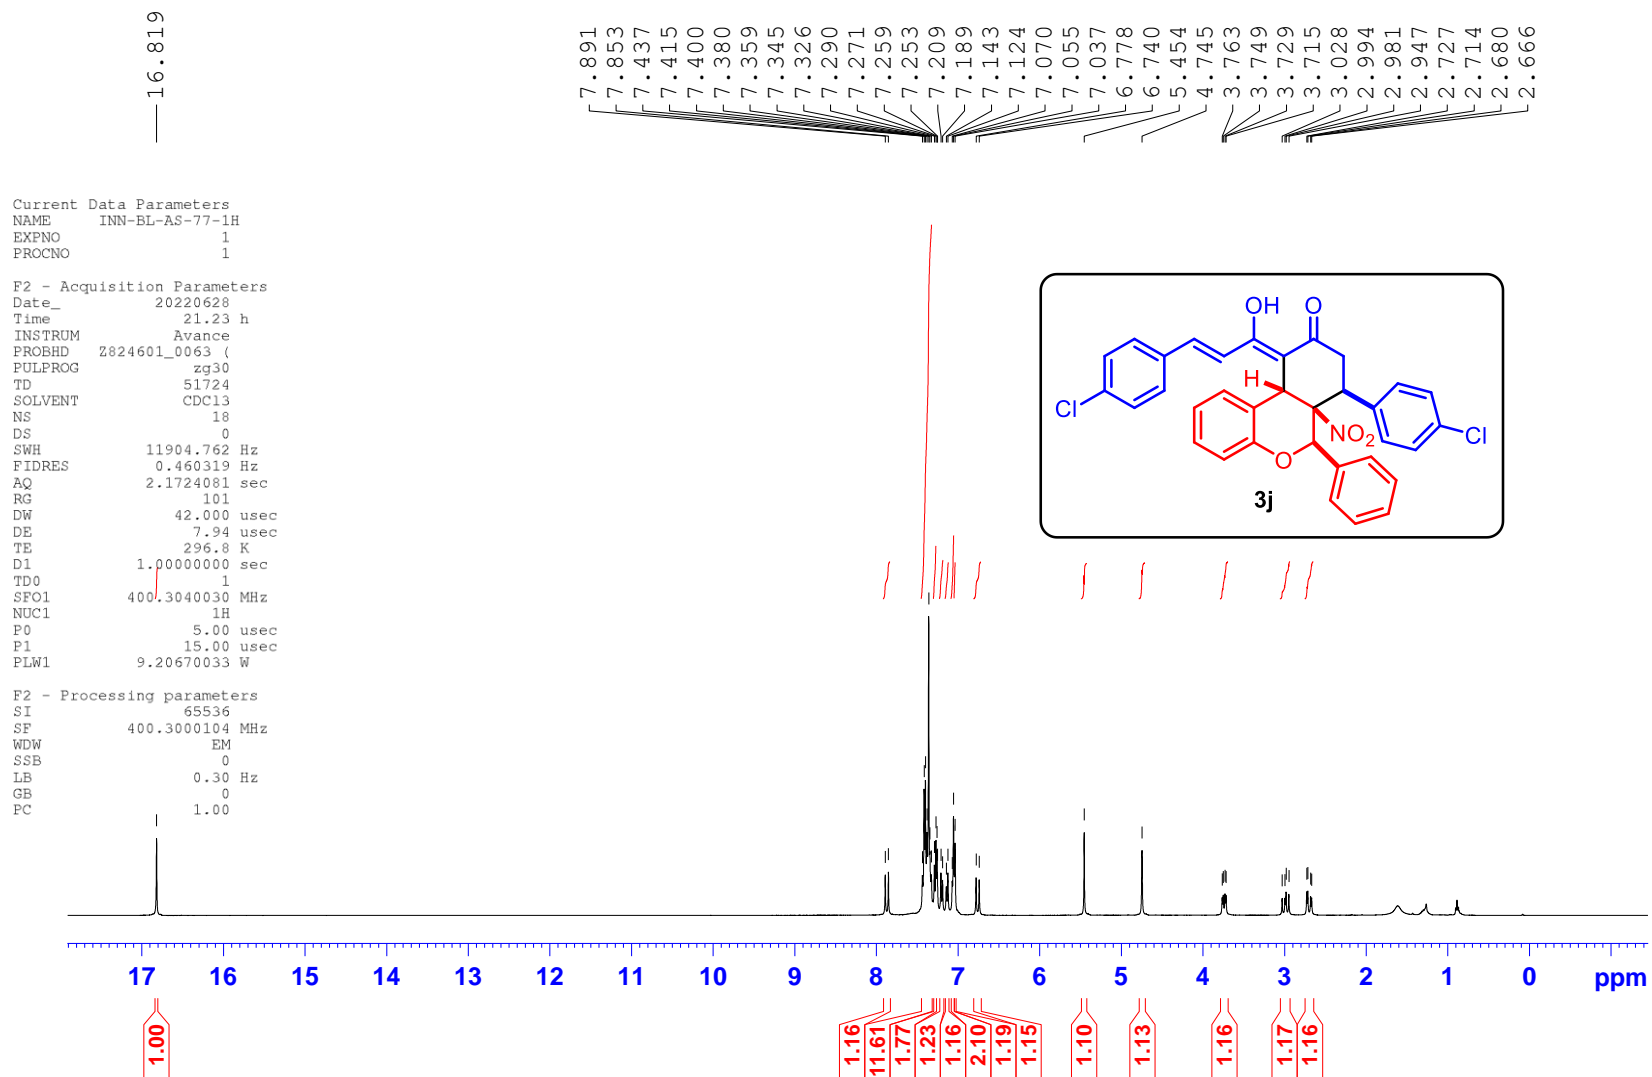

Figure S31. <sup>1</sup>H NMR Spectrum of 3j

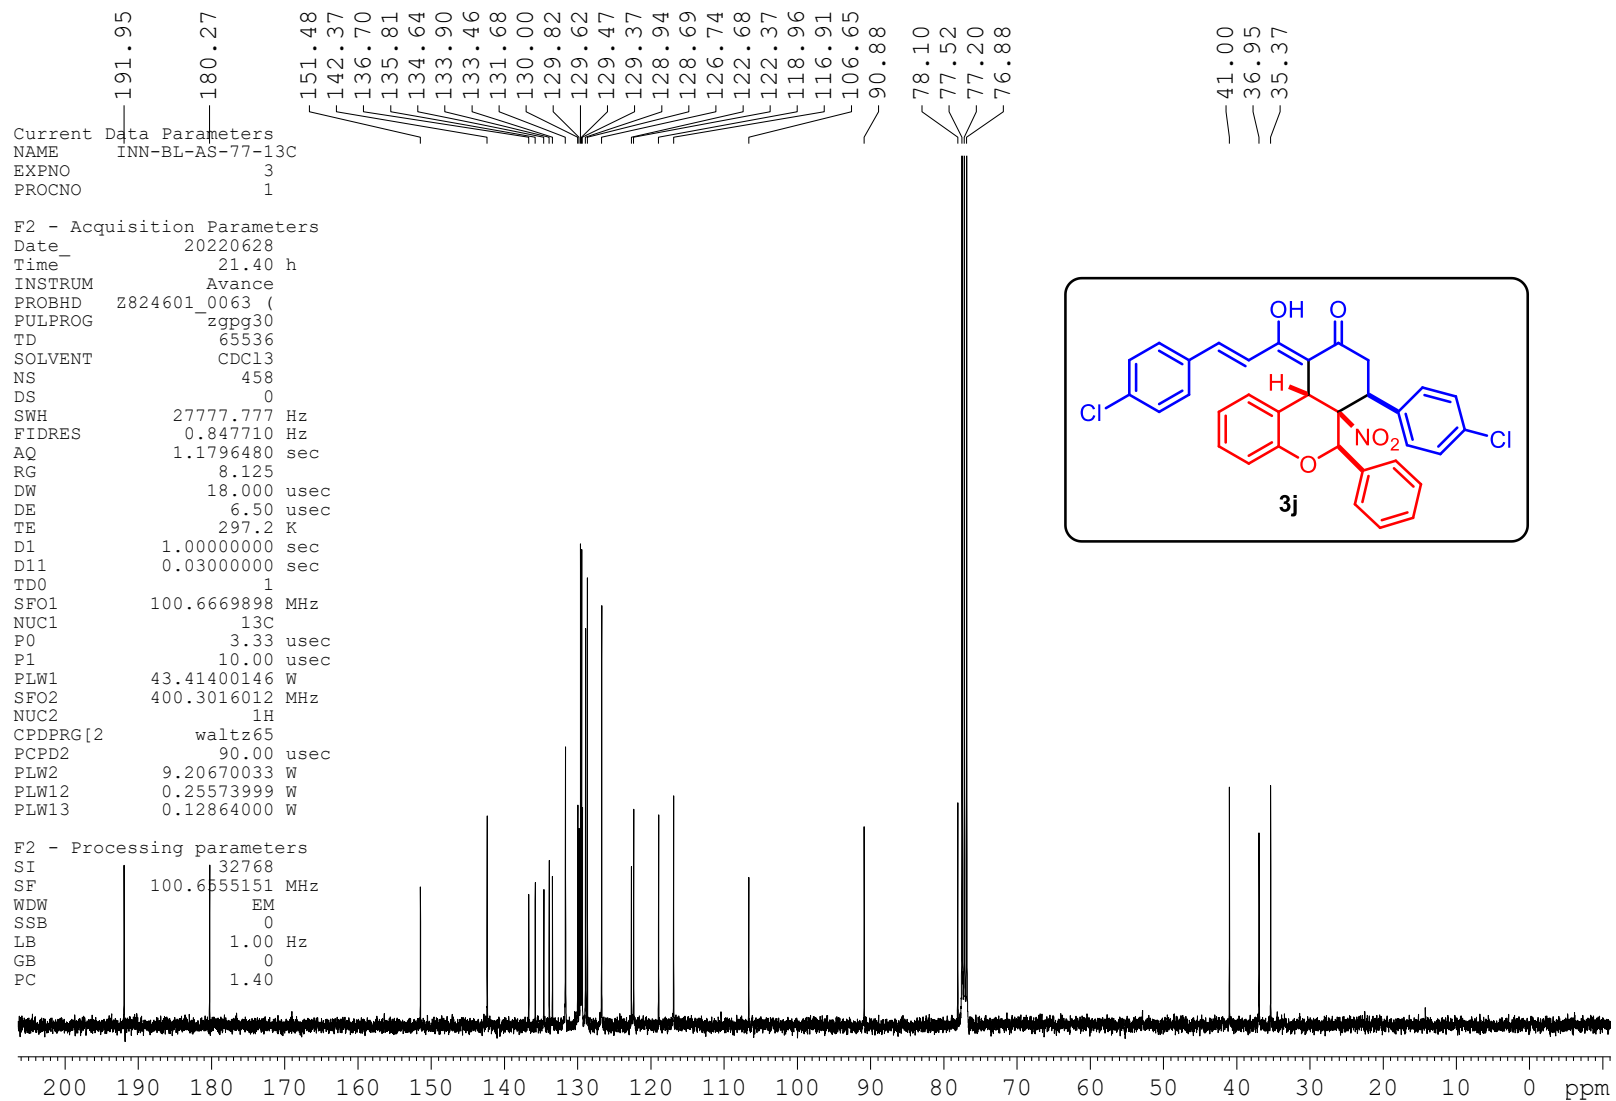

Figure S32.  $^{13}\text{C}$  NMR Spectrum of 3j

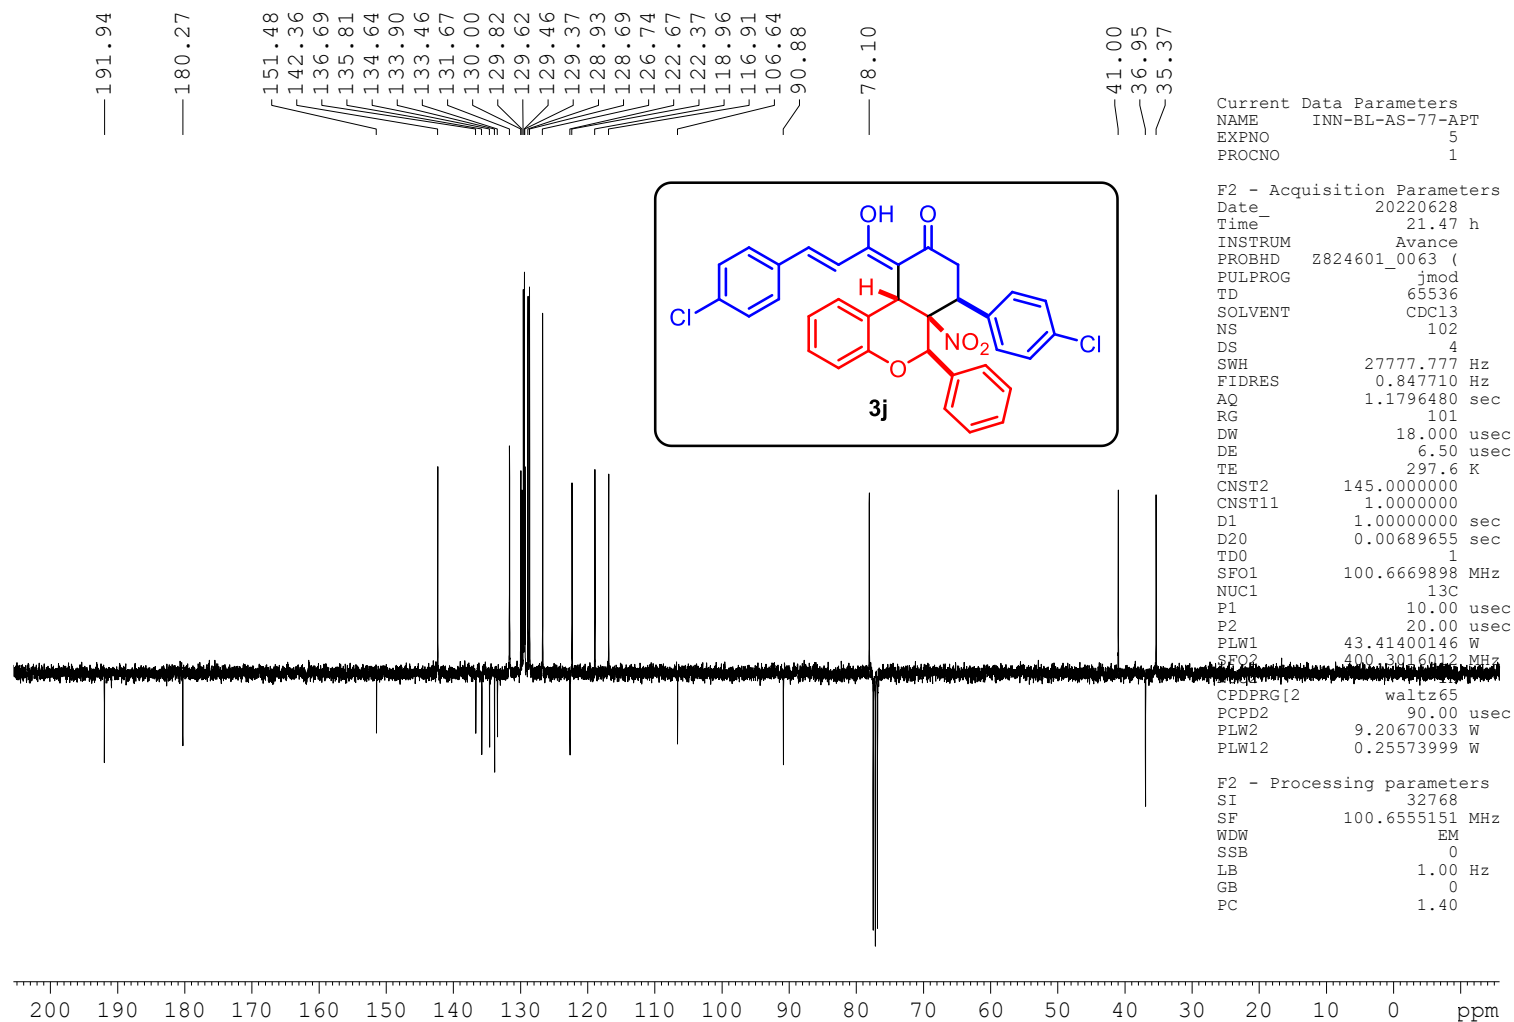

Figure S33. <sup>13</sup>C-APT Spectrum of **3j**

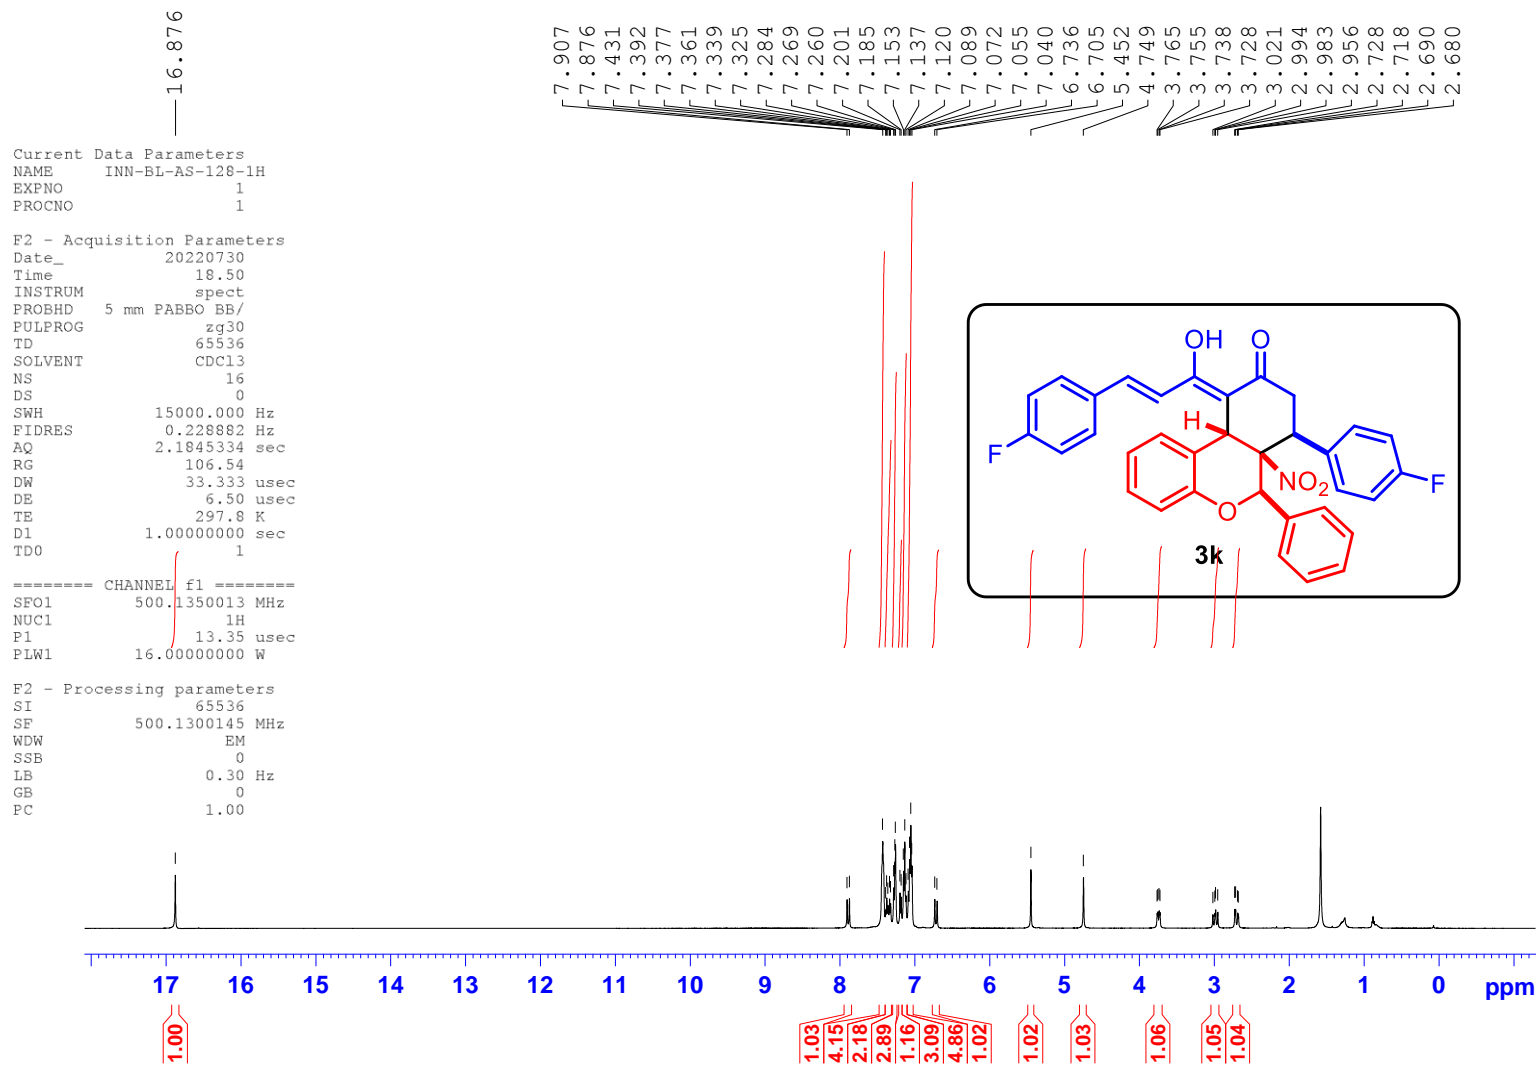

Figure S34. <sup>1</sup>H NMR Spectrum of 3k

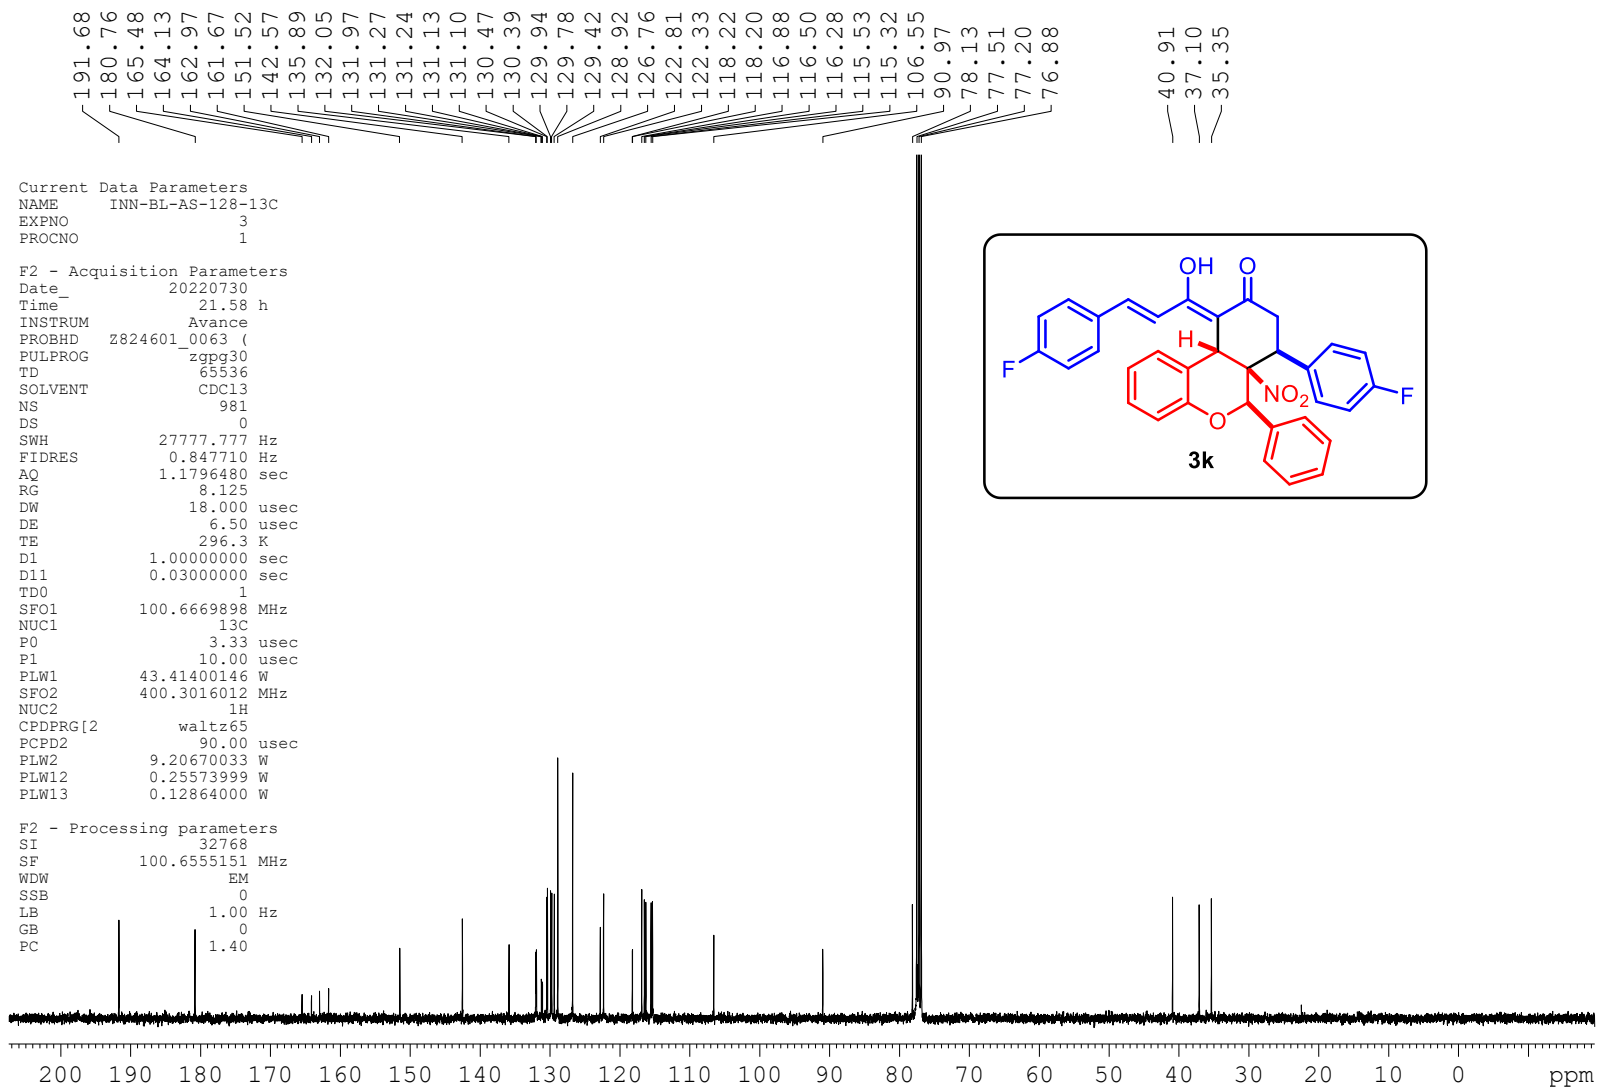

Figure S35. <sup>13</sup>C NMR Spectrum of 3k

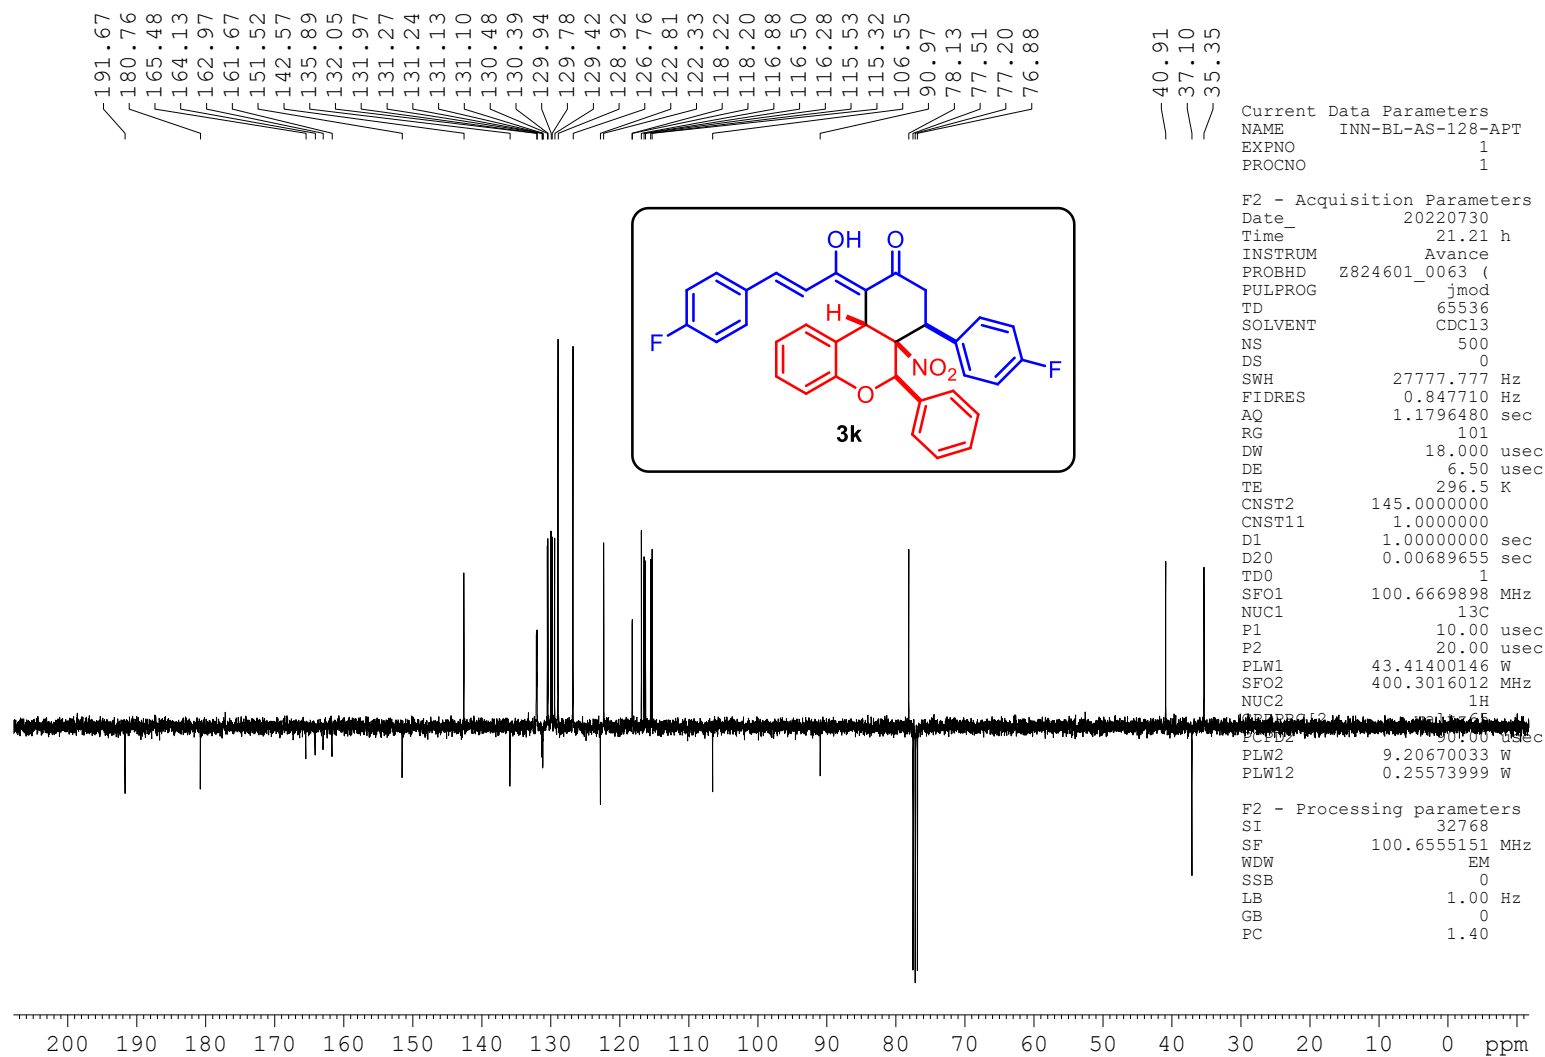

Figure S36. <sup>13</sup>C-APT NMR Spectrum of 3k

Current Data Parameters  
NAME INN-BL-AS-128-19F-NEW  
EXPNO 10  
PROCNO 1

F2 - Acquisition Parameters

Date\_ 20220730  
Time 20.35 h  
INSTRUM Avance Neo 400  
PROBHD Z163739\_0226 (  
PULPROG zg  
TD 131072  
SOLVENT CDC13  
NS 161  
DS 0  
SWH 166666.672 Hz  
FIDRES 2.543132 Hz  
AQ 0.3932160 sec  
RG 101  
DW 3.000 usec  
DE 6.50 usec  
TE 295.3 K  
D1 1.00000000 sec  
TDO 1  
SFO1 376.4795413 MHz  
NUC1 19F  
P1 12.00 usec  
PLW1 31.08799934 W

F2 - Processing parameters

SI 65536  
SF 376.4983662 MHz  
WDW EM  
SSB 0  
LB 1.00 Hz  
GB 0  
PC 1.00

-108.69  
-113.46

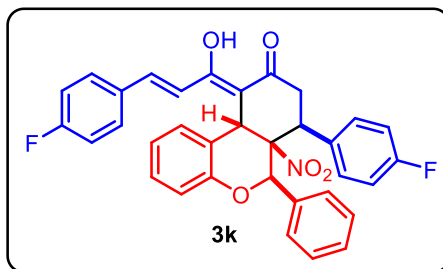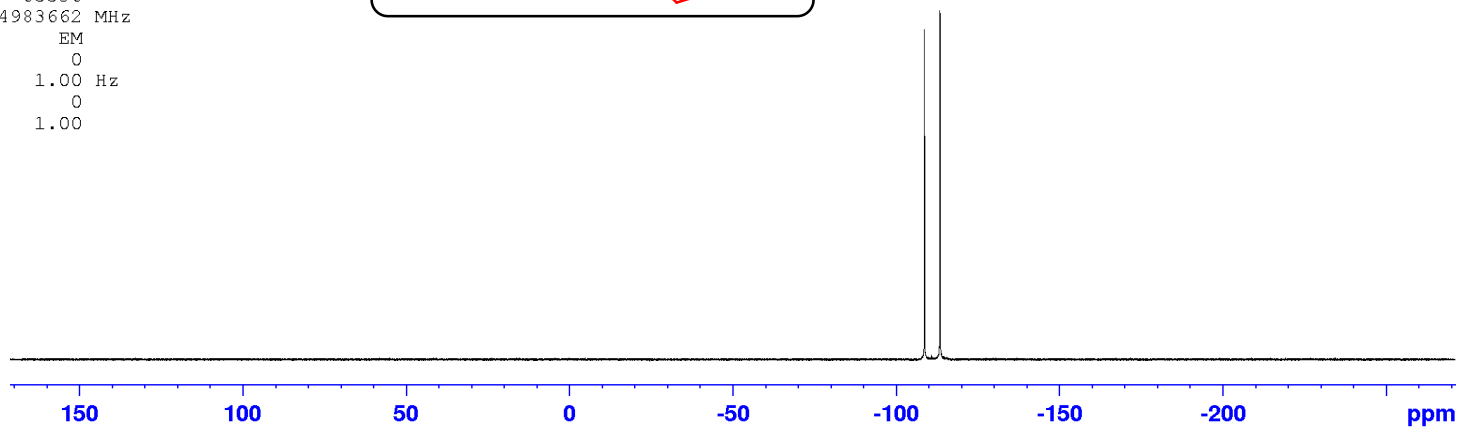

Figure S37. <sup>19</sup>F NMR Spectrum of 3k



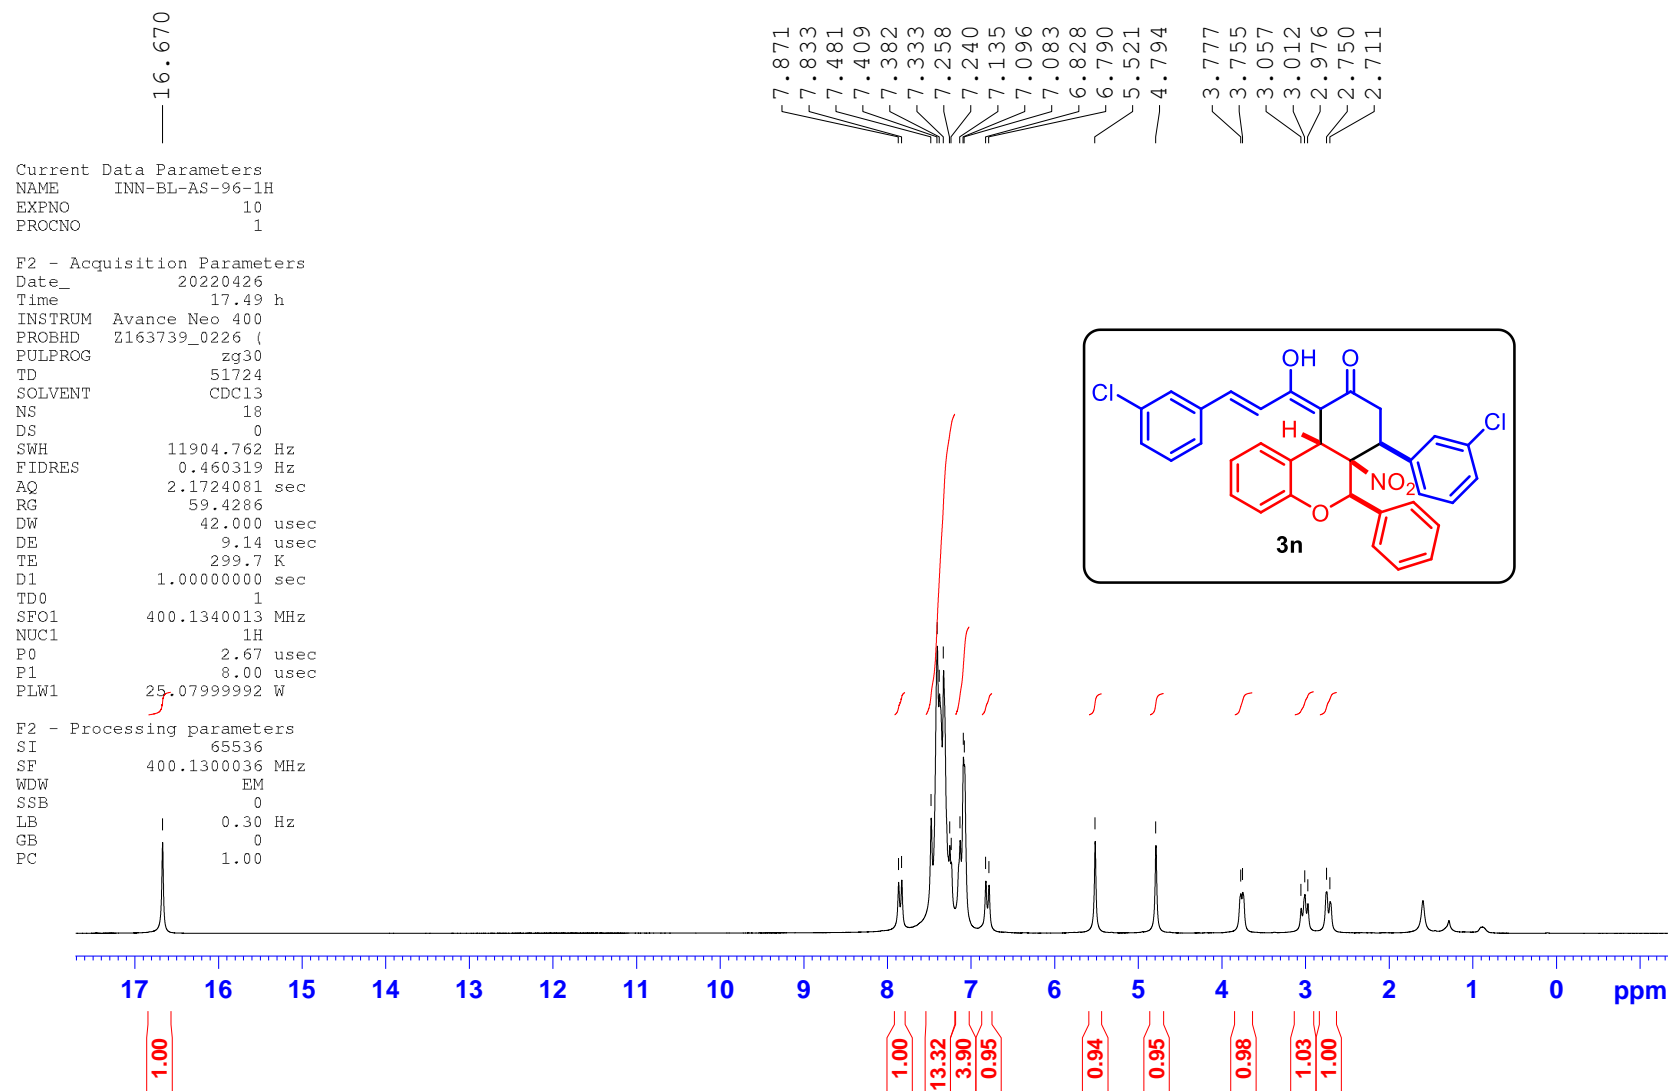

Figure S38. <sup>1</sup>H NMR Spectrum of 3n

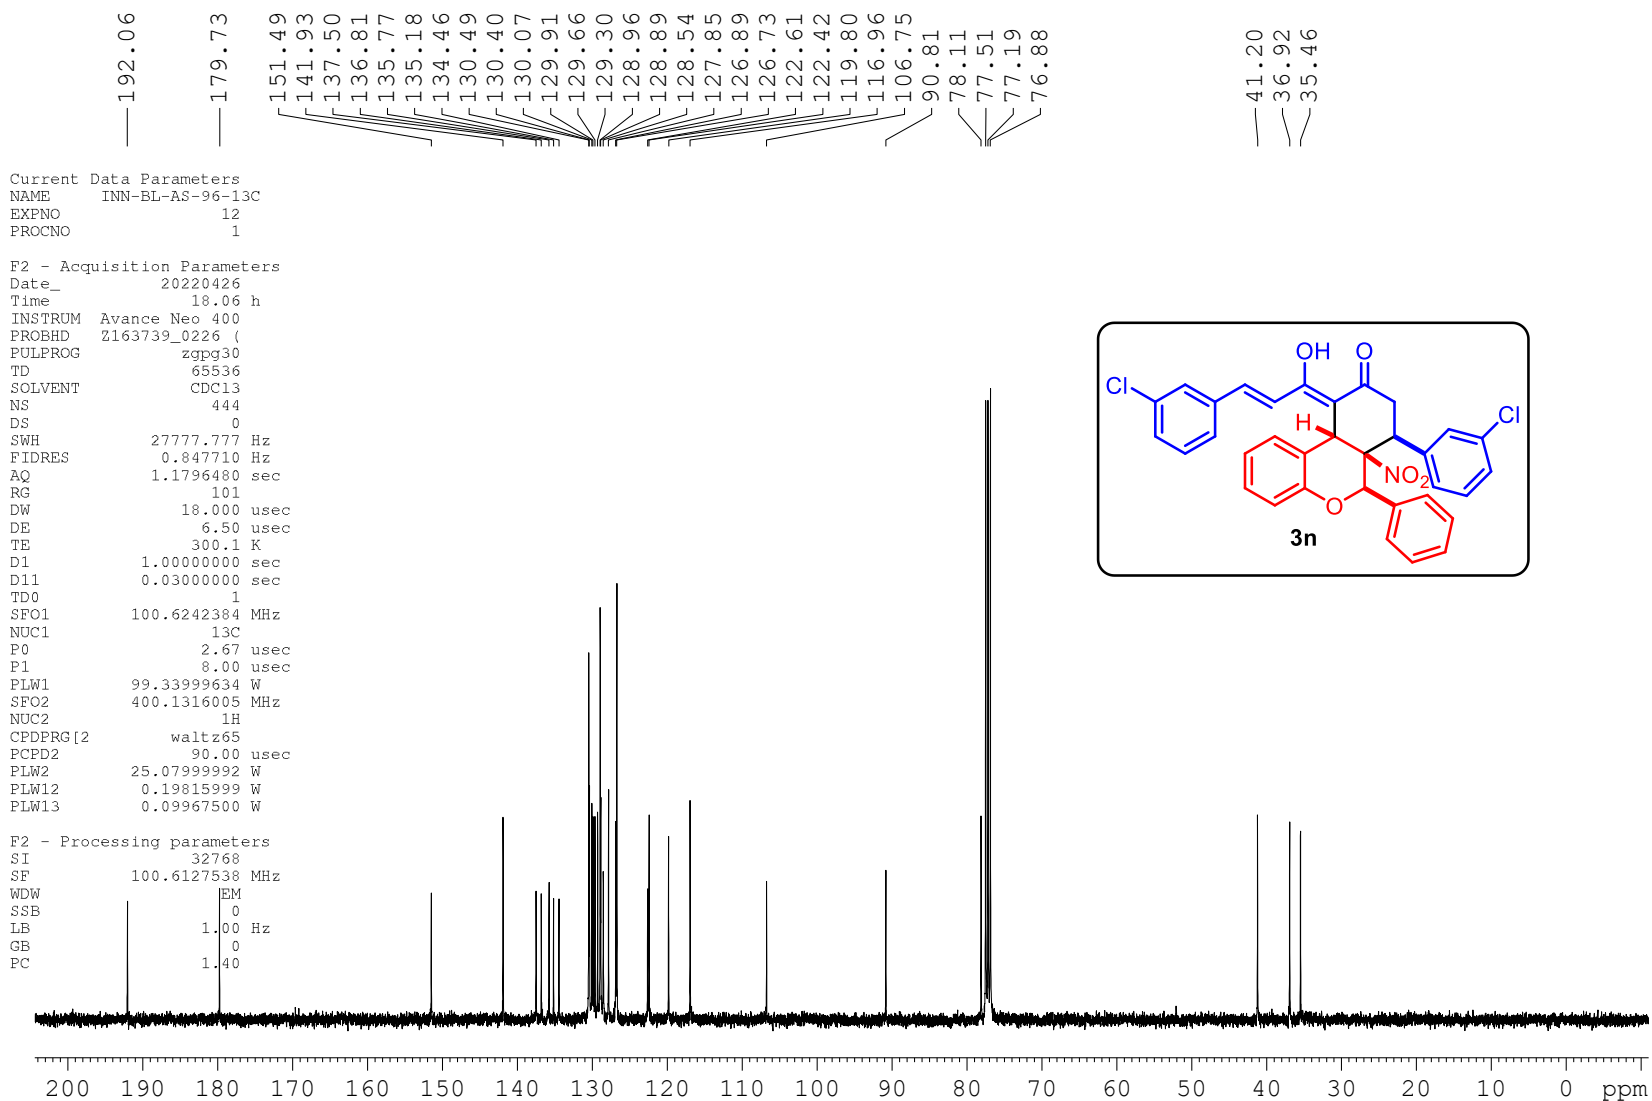

Figure S39. <sup>13</sup>C NMR Spectrum of 3n

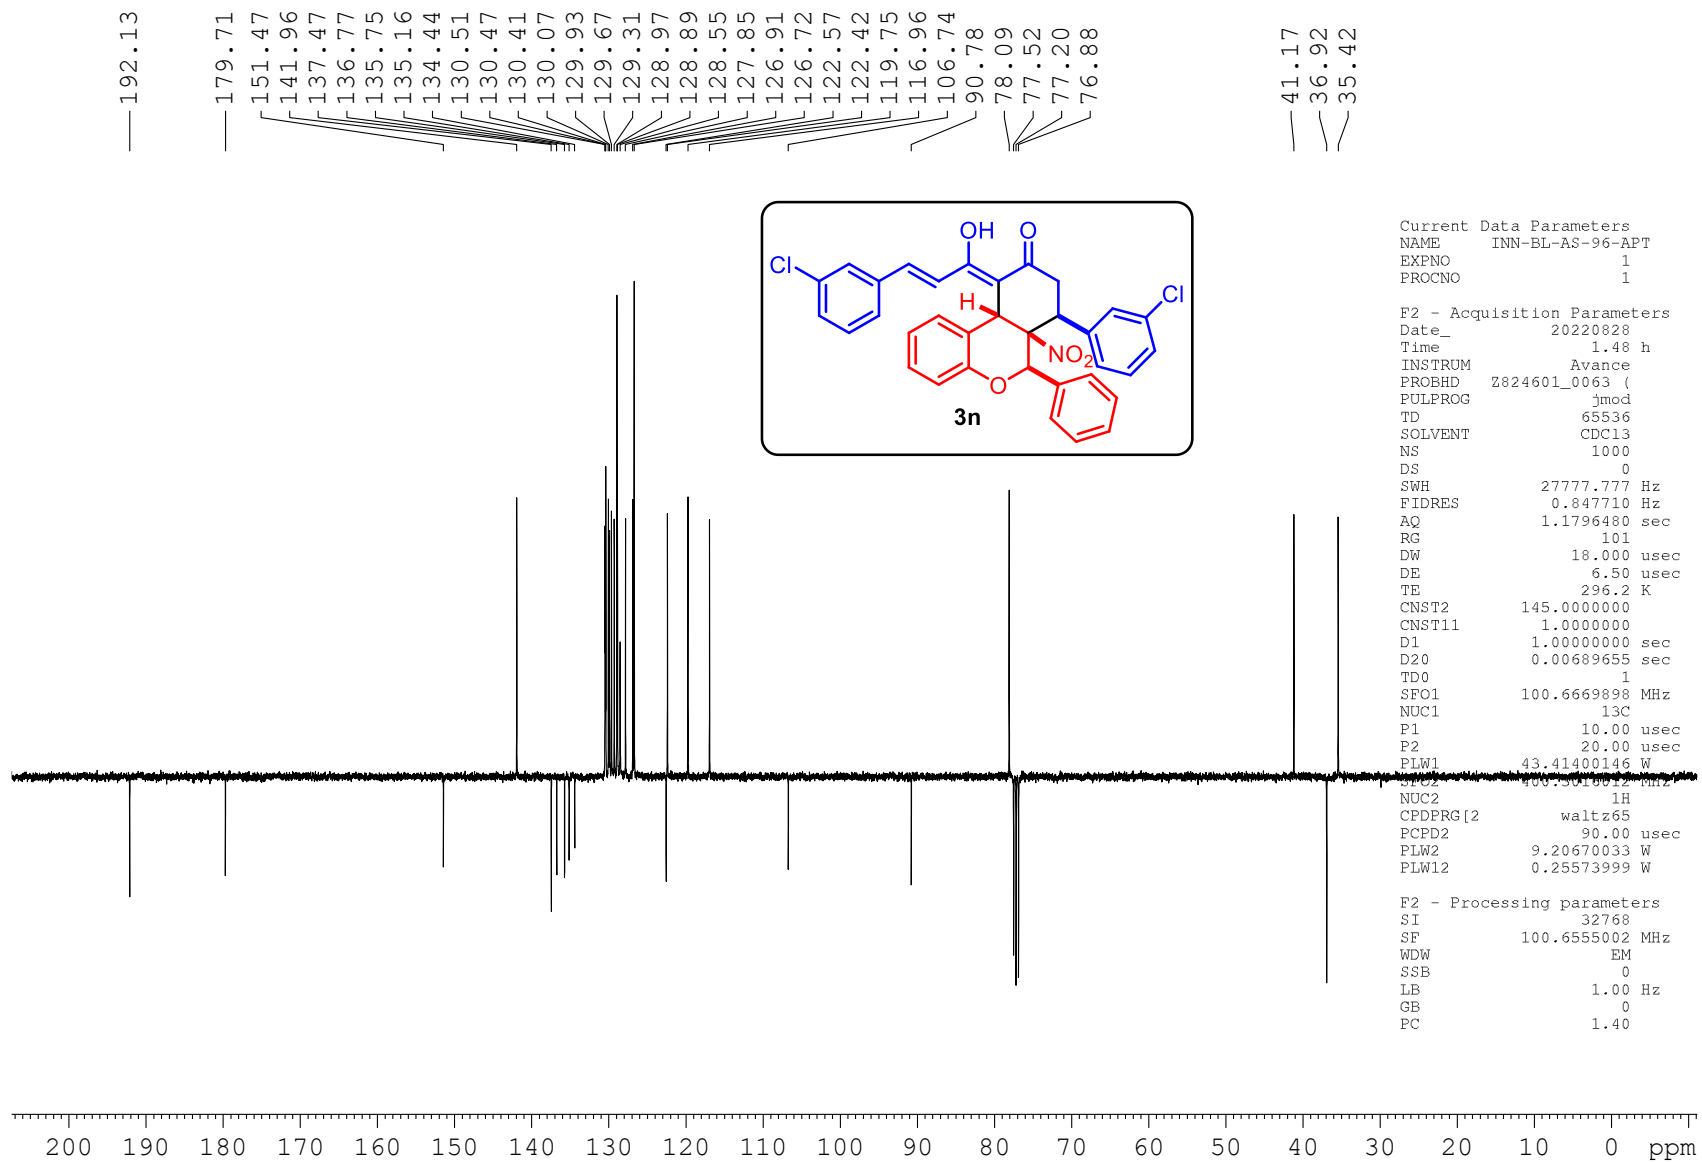

Figure S40. <sup>13</sup>C-APT NMR Spectrum of **3n**

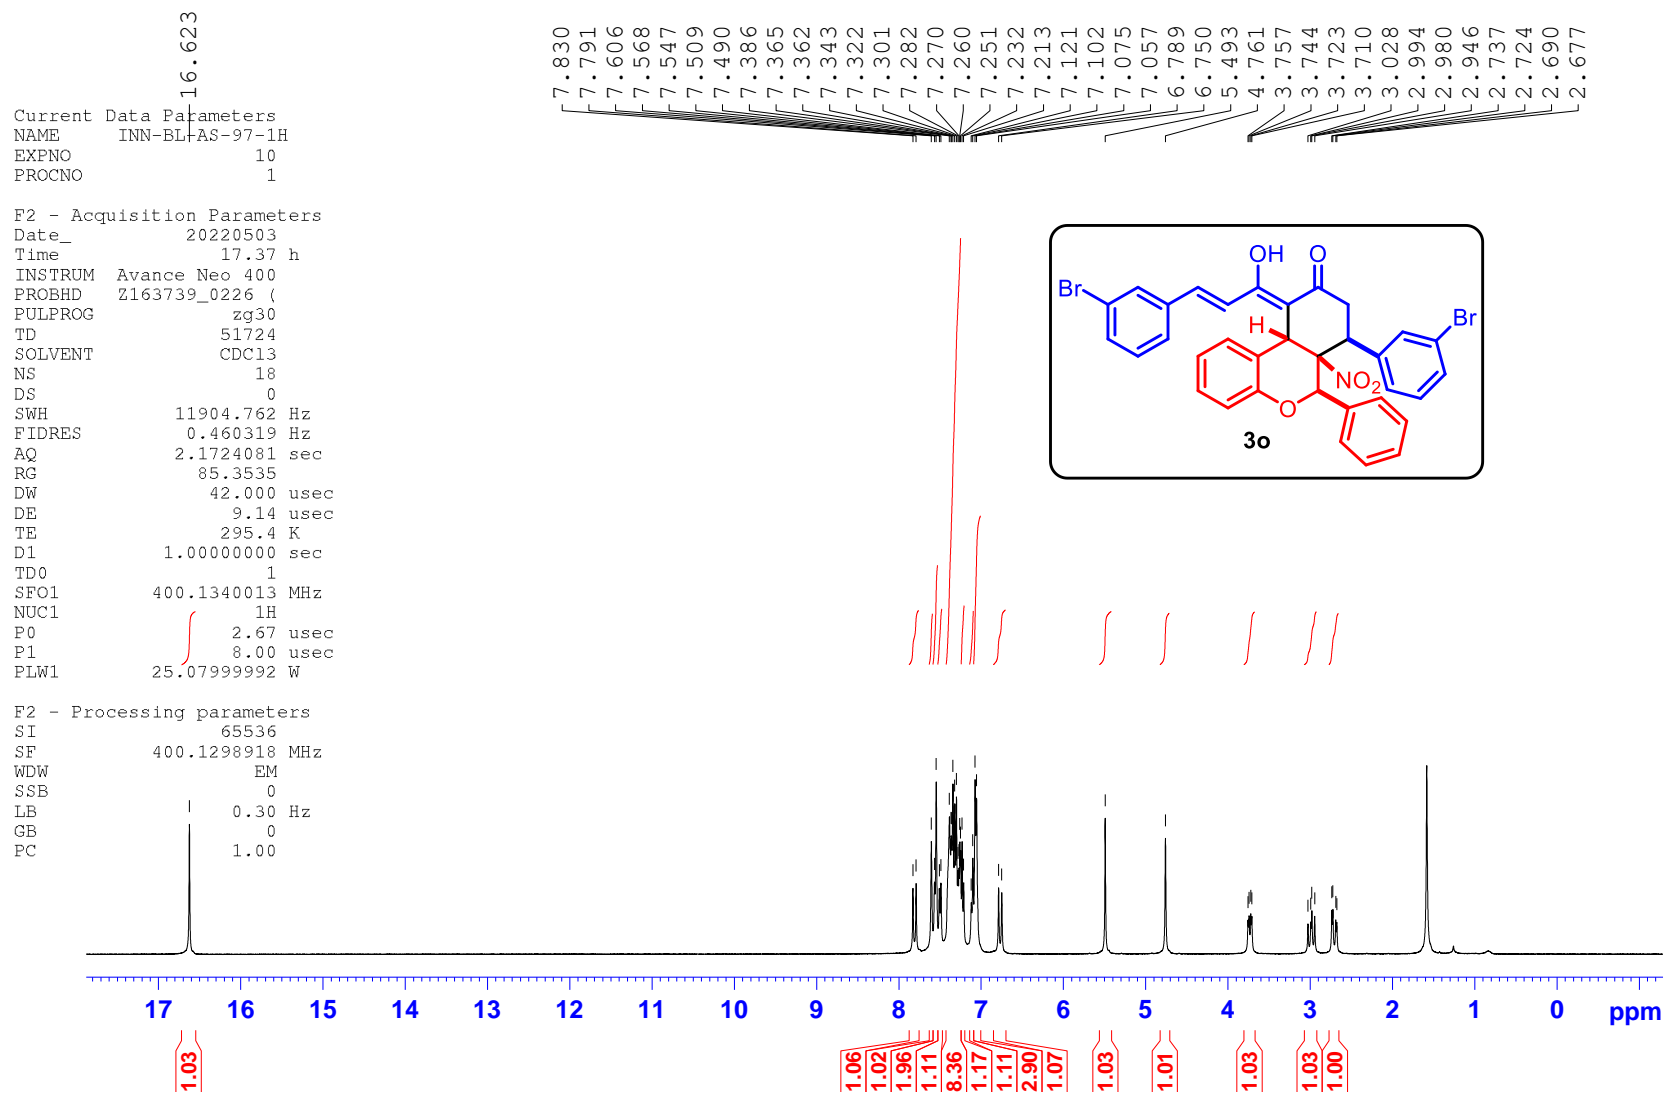

Figure S41. <sup>1</sup>H NMR Spectrum of 3o

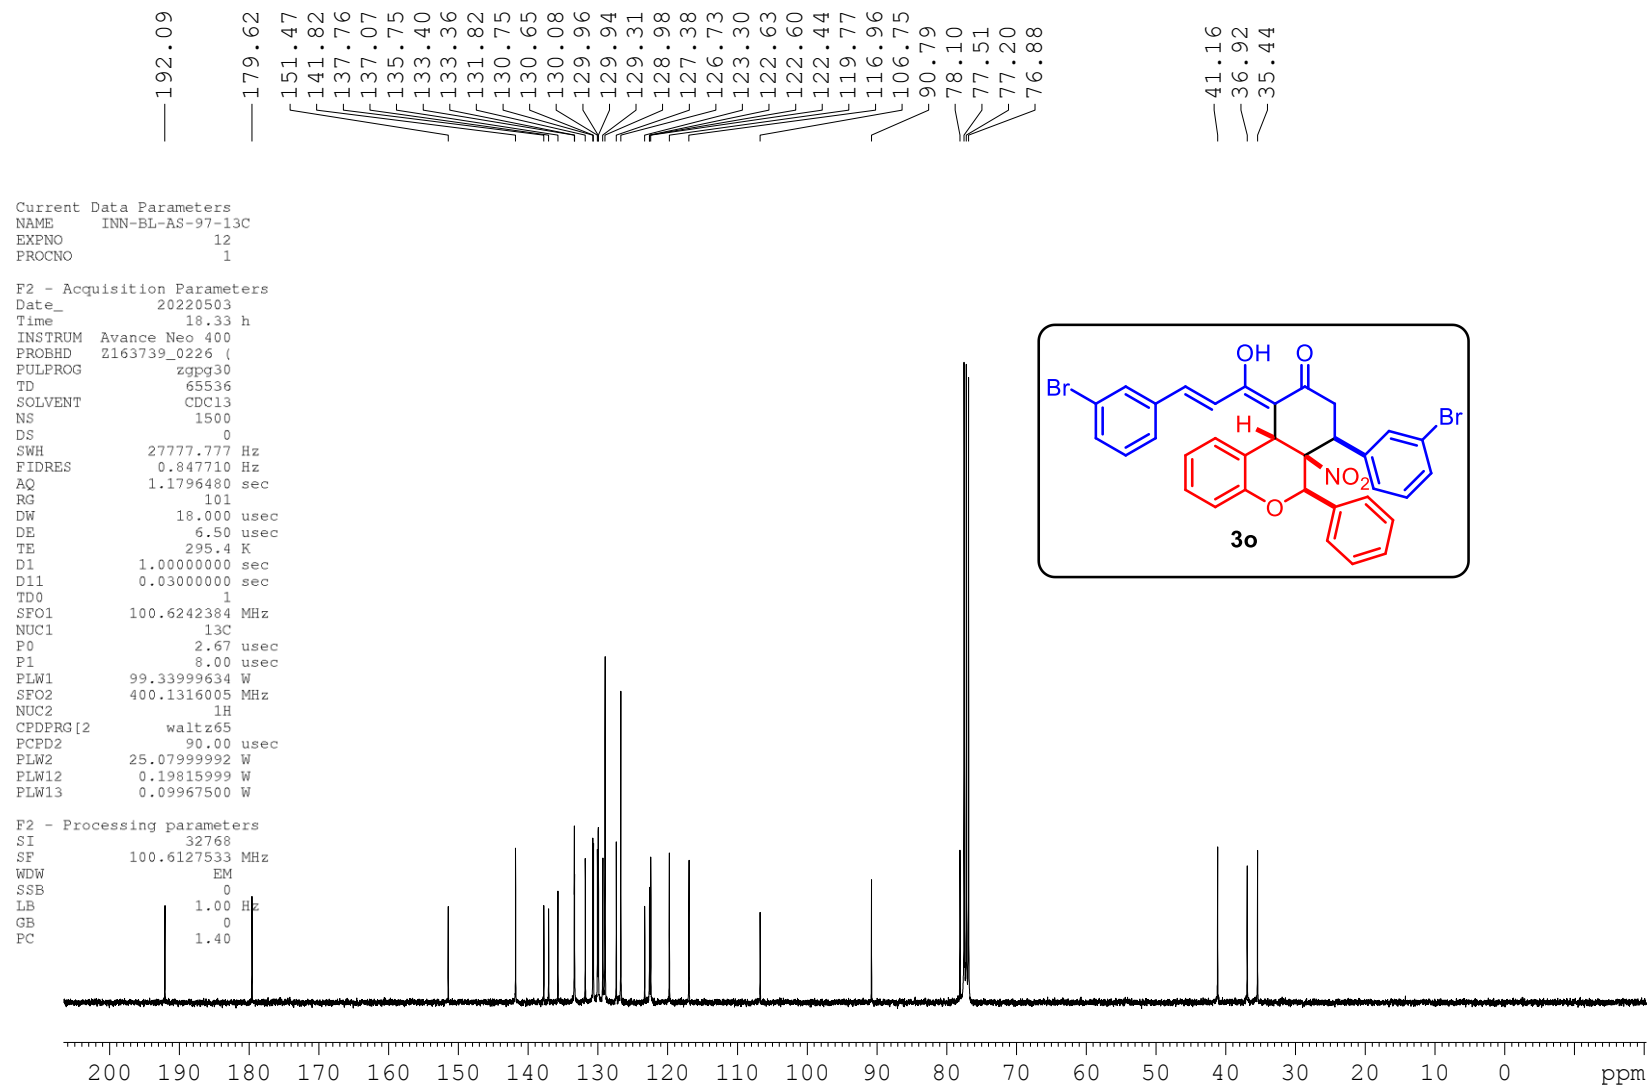

Figure S42. <sup>13</sup>C NMR Spectrum of 3o

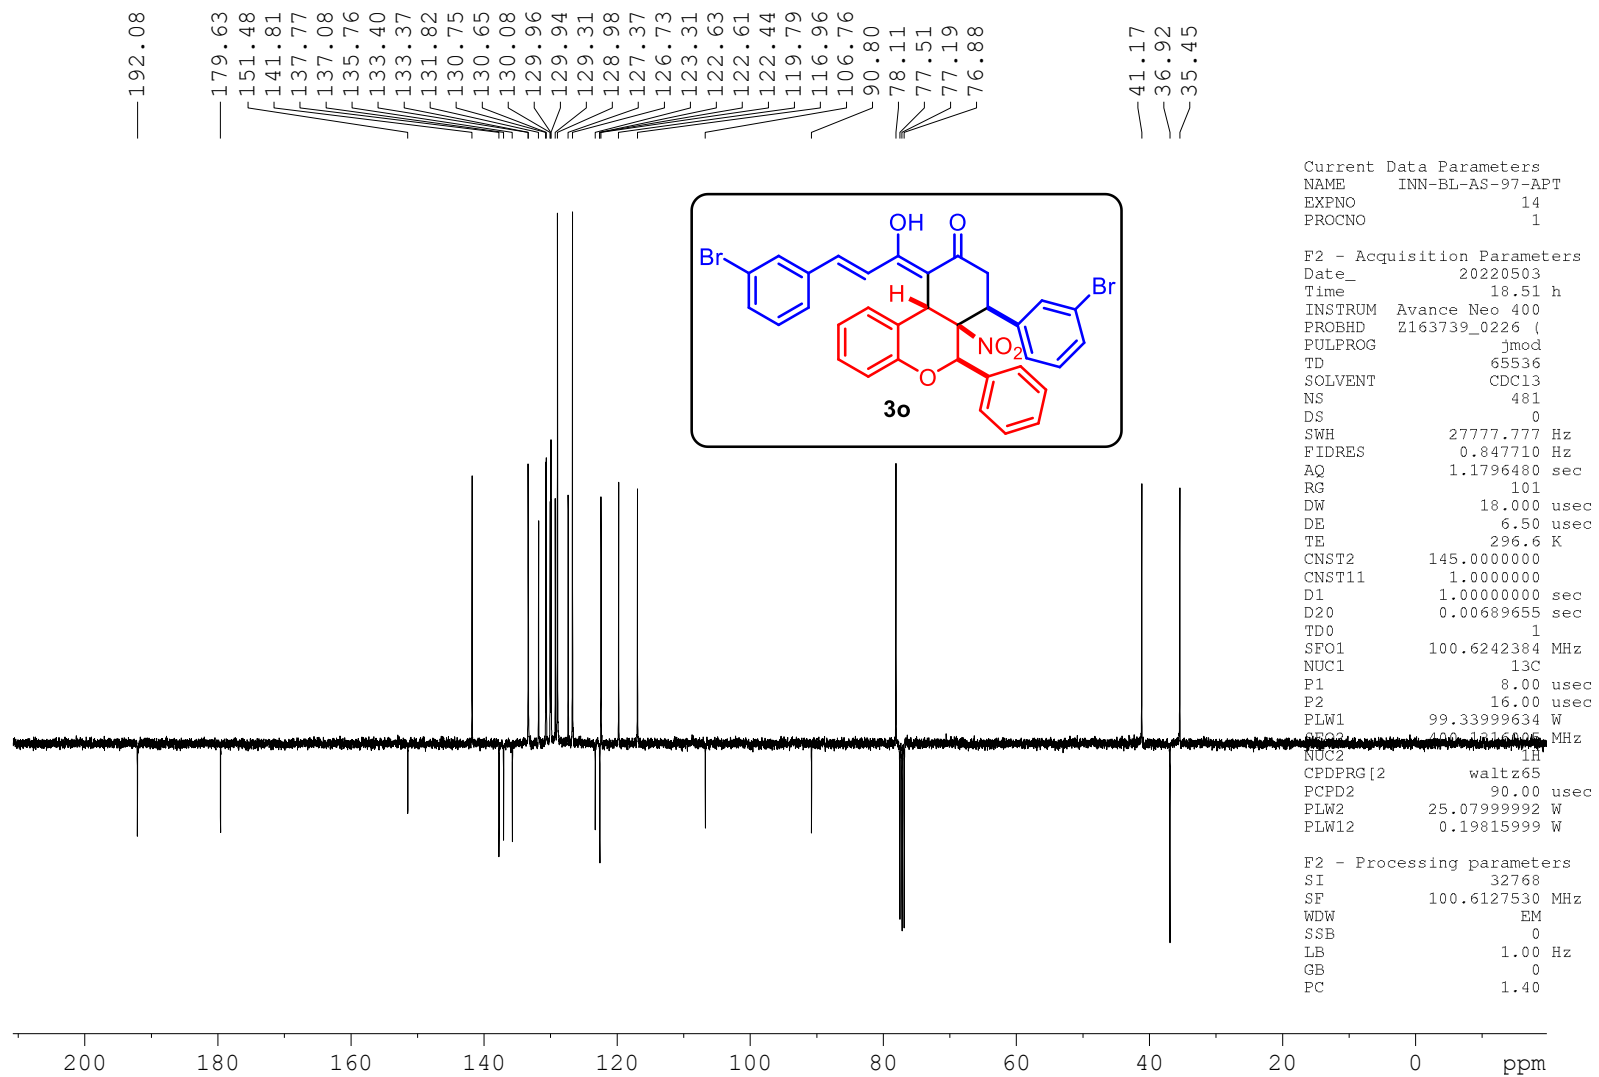

Figure S43. <sup>13</sup>C-APT NMR Spectrum of **3o**

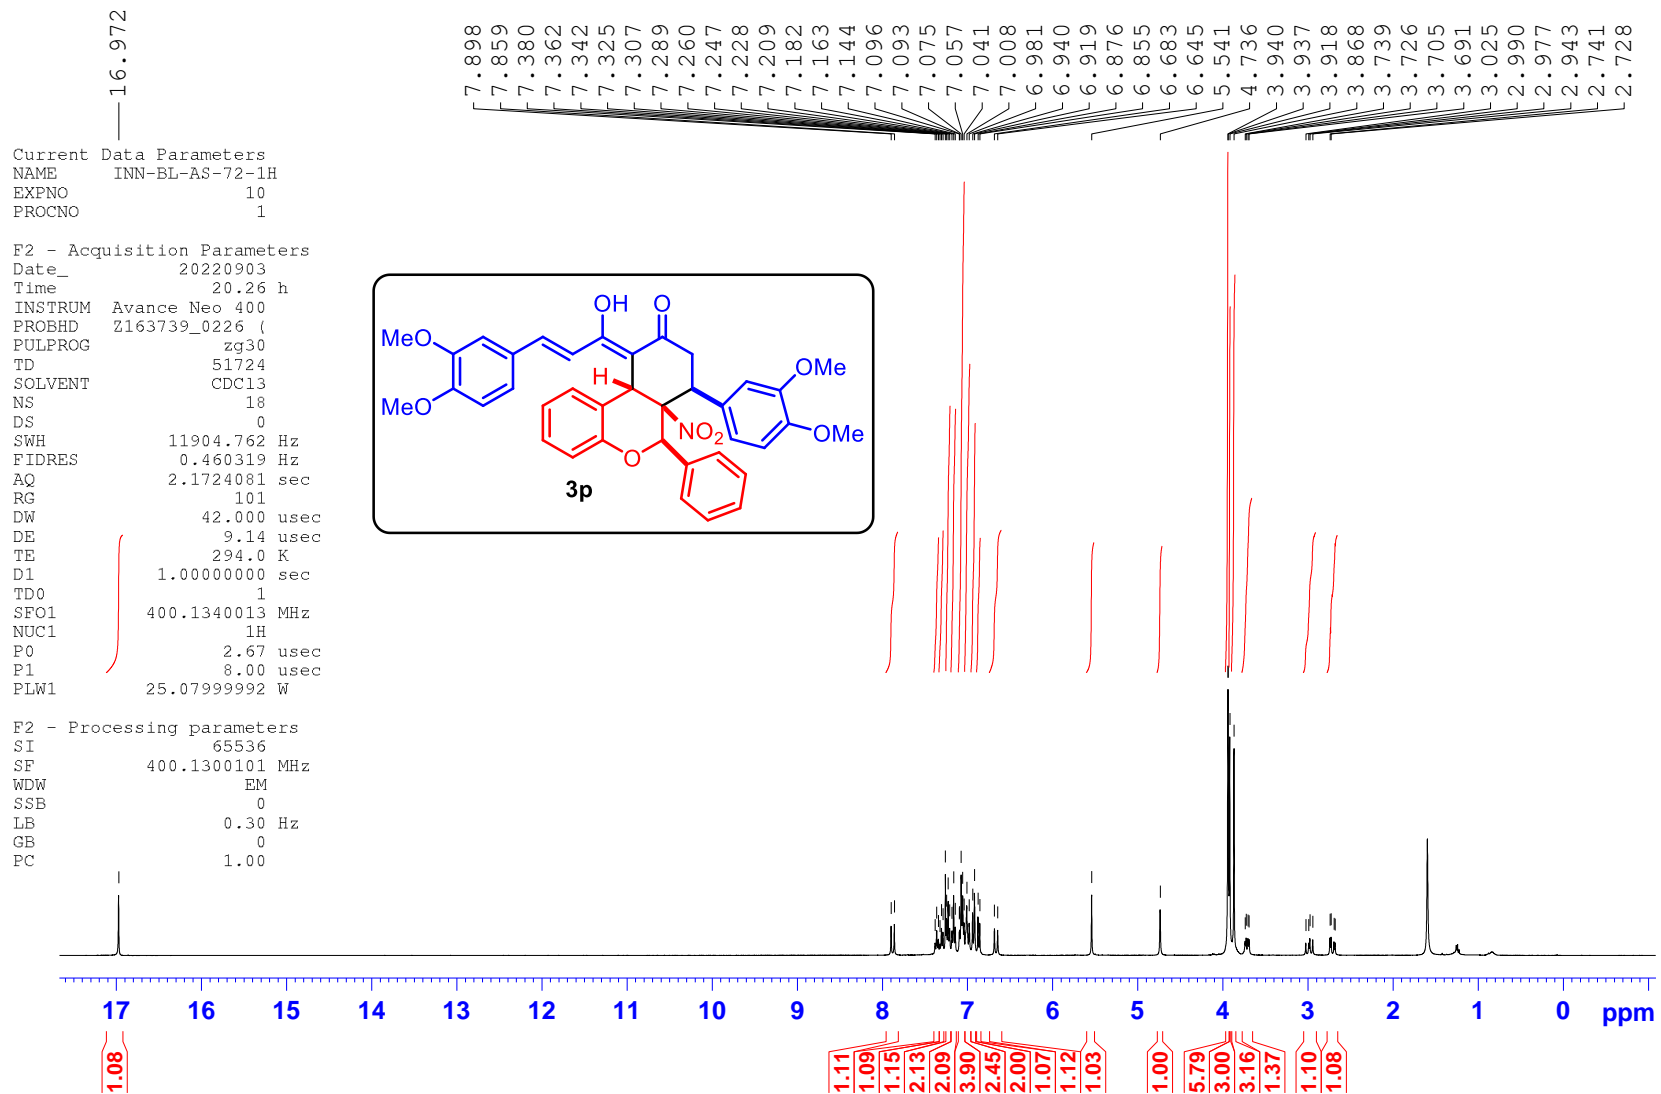

Figure S44. <sup>1</sup>H NMR Spectrum of 3p

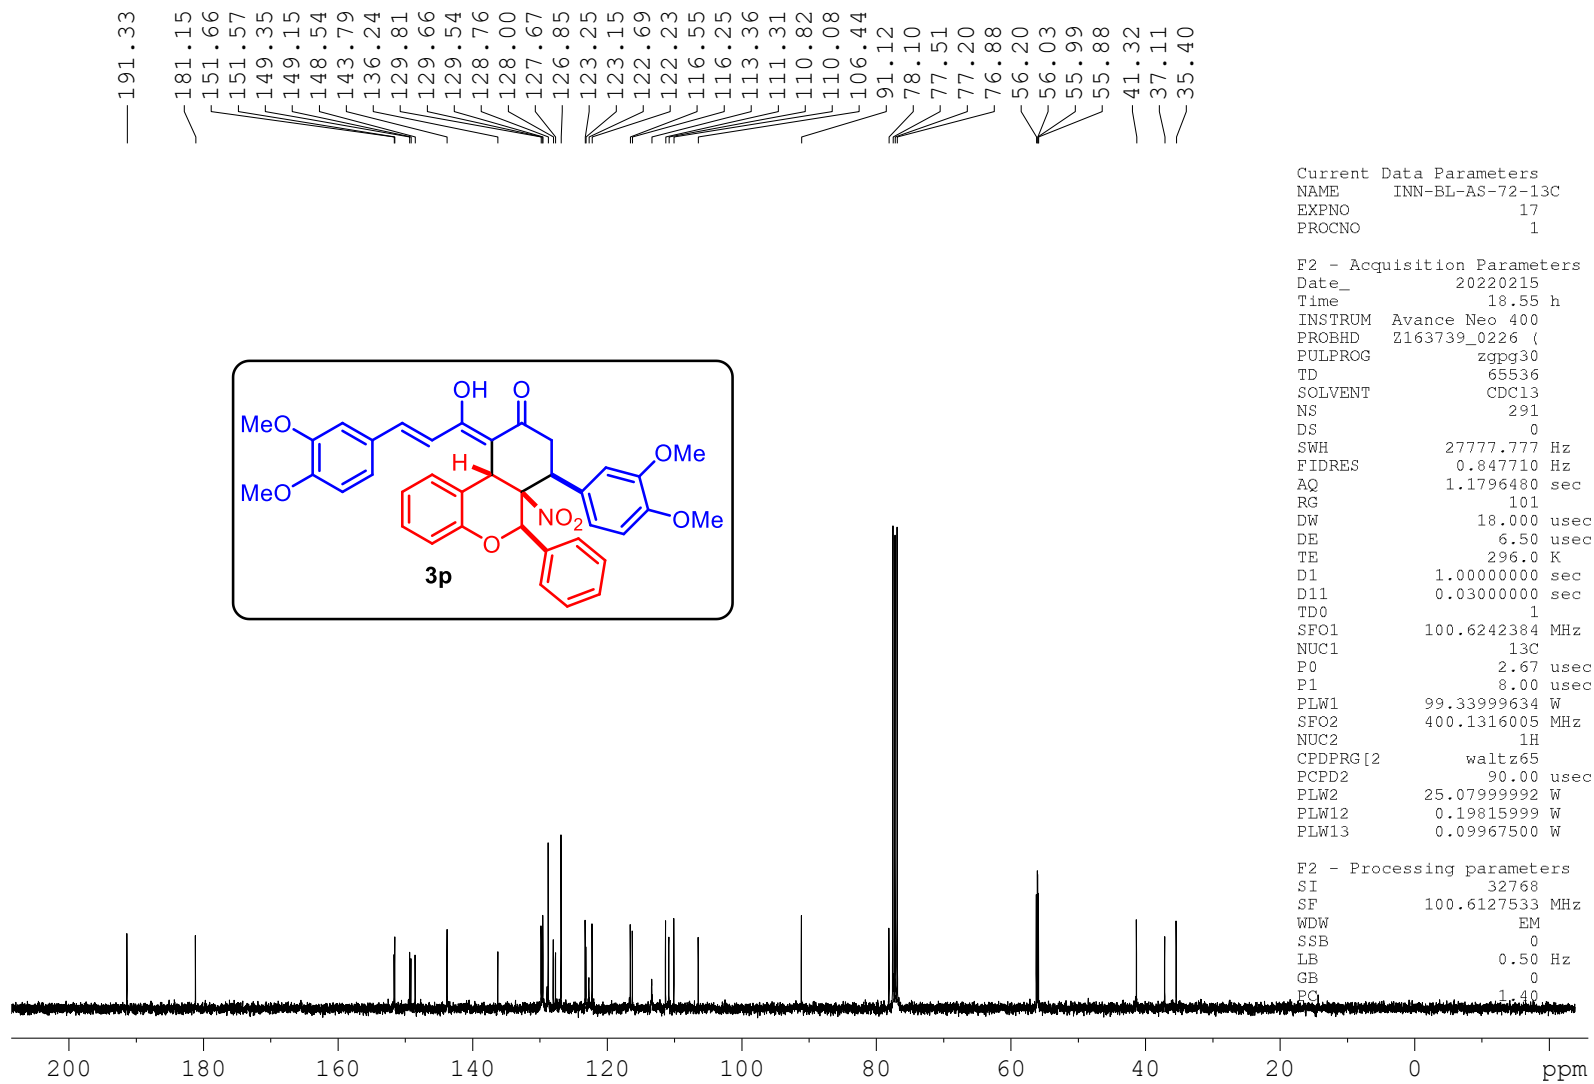

Figure S45. <sup>13</sup>C NMR Spectrum of 3p



INN-BL-AS-105-1H

16.891  
Current Data Parameters  
NAME INN-BL-AS-105-1H  
EXPNO 10  
PROCNO 1

F2 - Acquisition Parameters  
Date\_ 20220704  
Time 21.05 h  
INSTRUM Avance Neo 400  
PROBHD Z163739\_0226 (  
PULPROG zg30  
TD 51724  
SOLVENT CDC13  
NS 18  
DS 0  
SWH 11904.762 Hz  
FIDRES 0.460319 Hz  
AQ 2.1724081 sec  
RG 101  
DW 42.000 usec  
DE 9.14 usec  
TE 297.0 K  
D1 1.00000000 sec  
TD0 1  
SFO1 400.1340013 MHz  
NUC1 1H  
P0 2.67 usec  
P1 8.00 usec  
PLW1 25.07999992 W

F2 - Processing parameters  
SI 65536  
SF 400.1300102 MHz  
WDW EM  
SSB 0  
LB 0.30 Hz  
GB 0  
PC 1.00

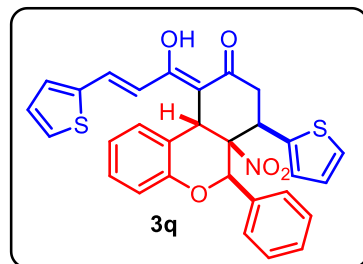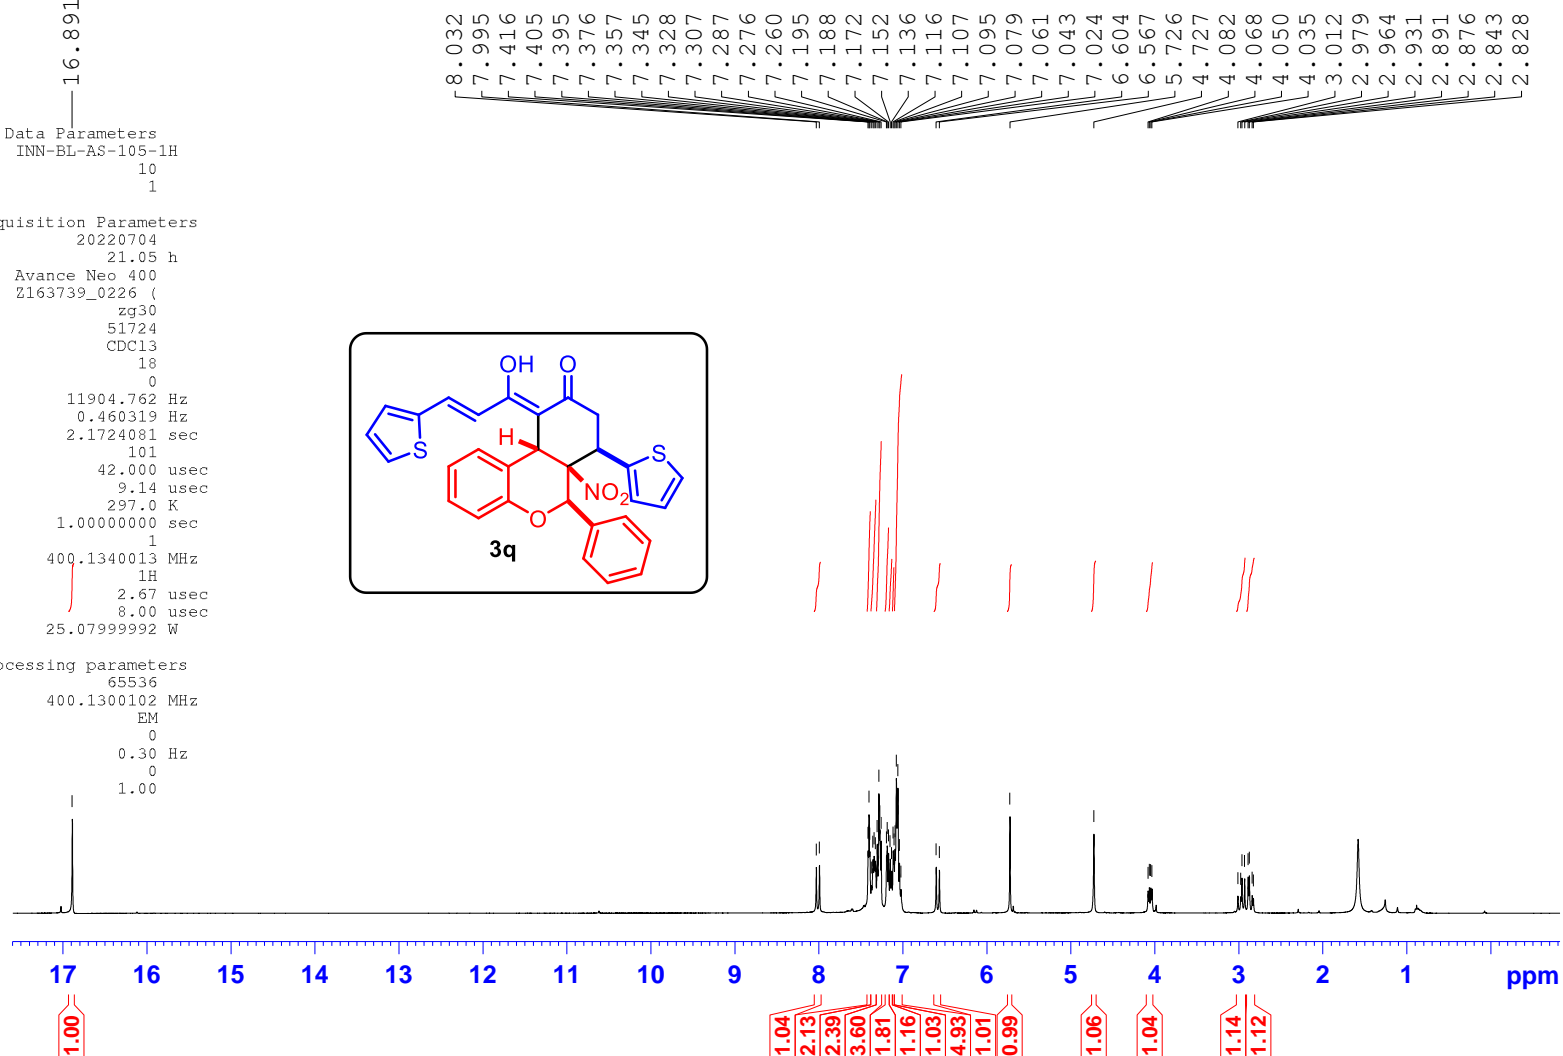

Figure S46. <sup>1</sup>H NMR Spectrum of 3q

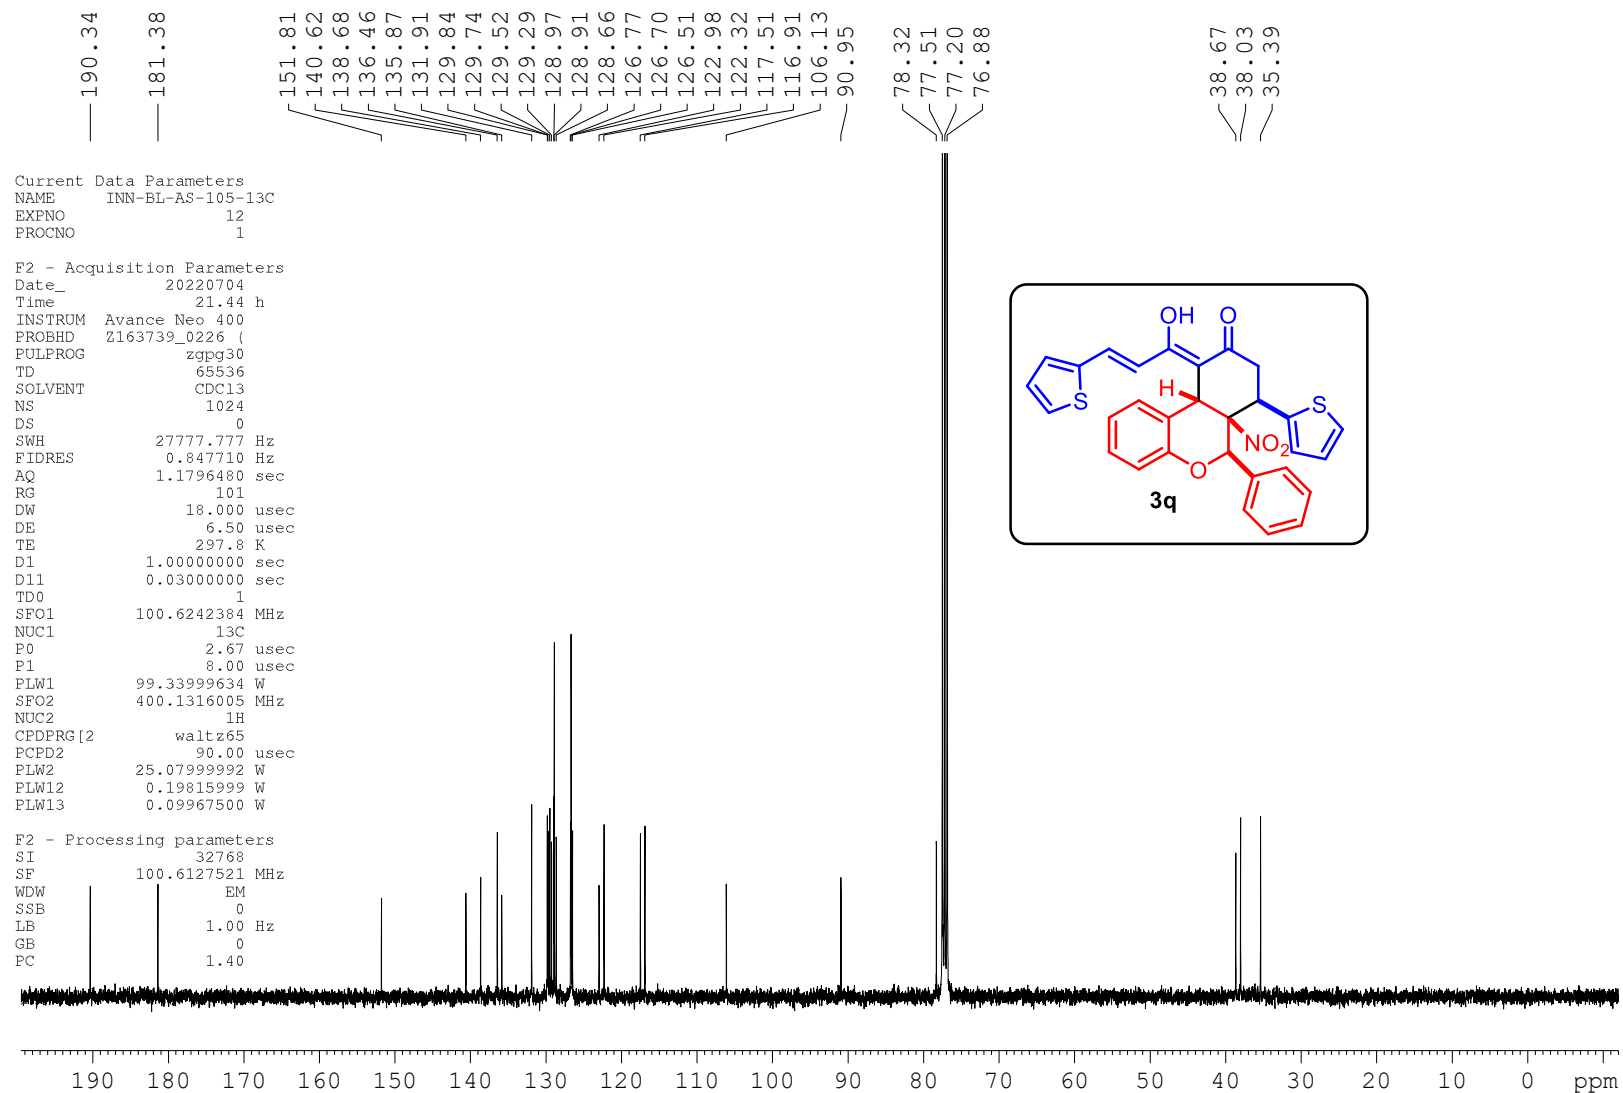

Figure S47. <sup>13</sup>C NMR Spectrum of 3q

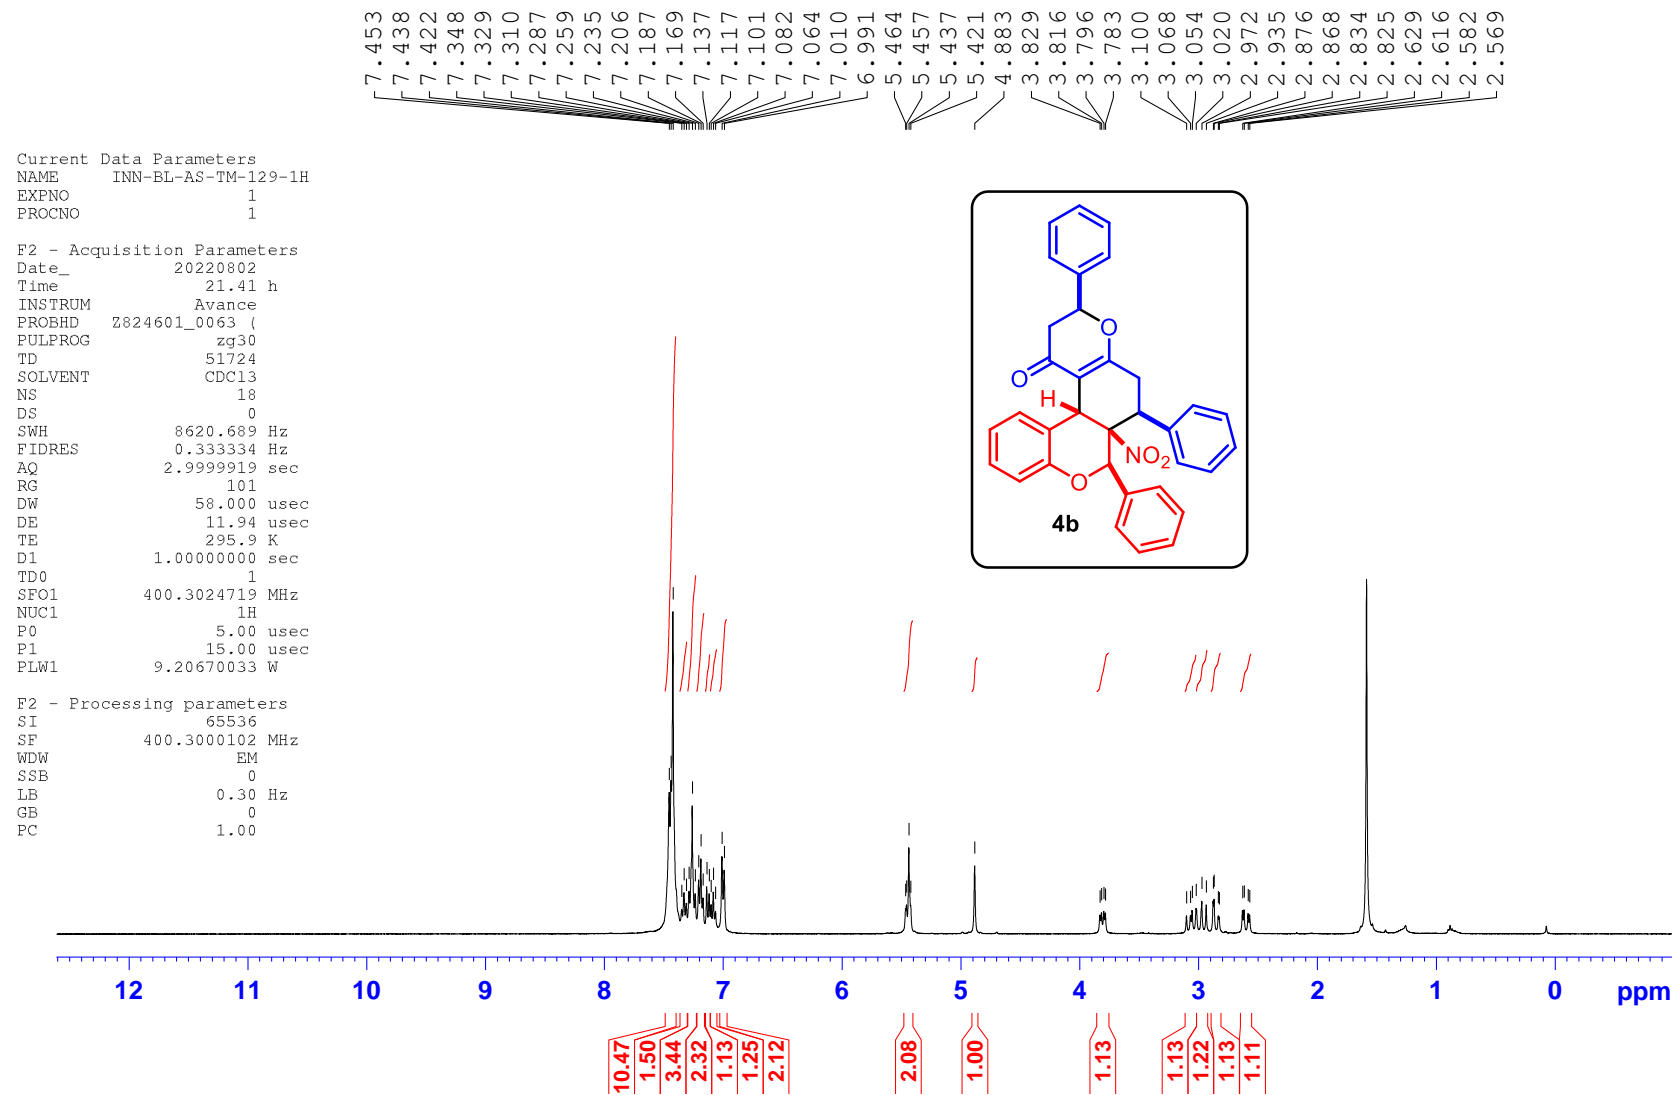

Figure S48. <sup>1</sup>H NMR Spectrum of 4b

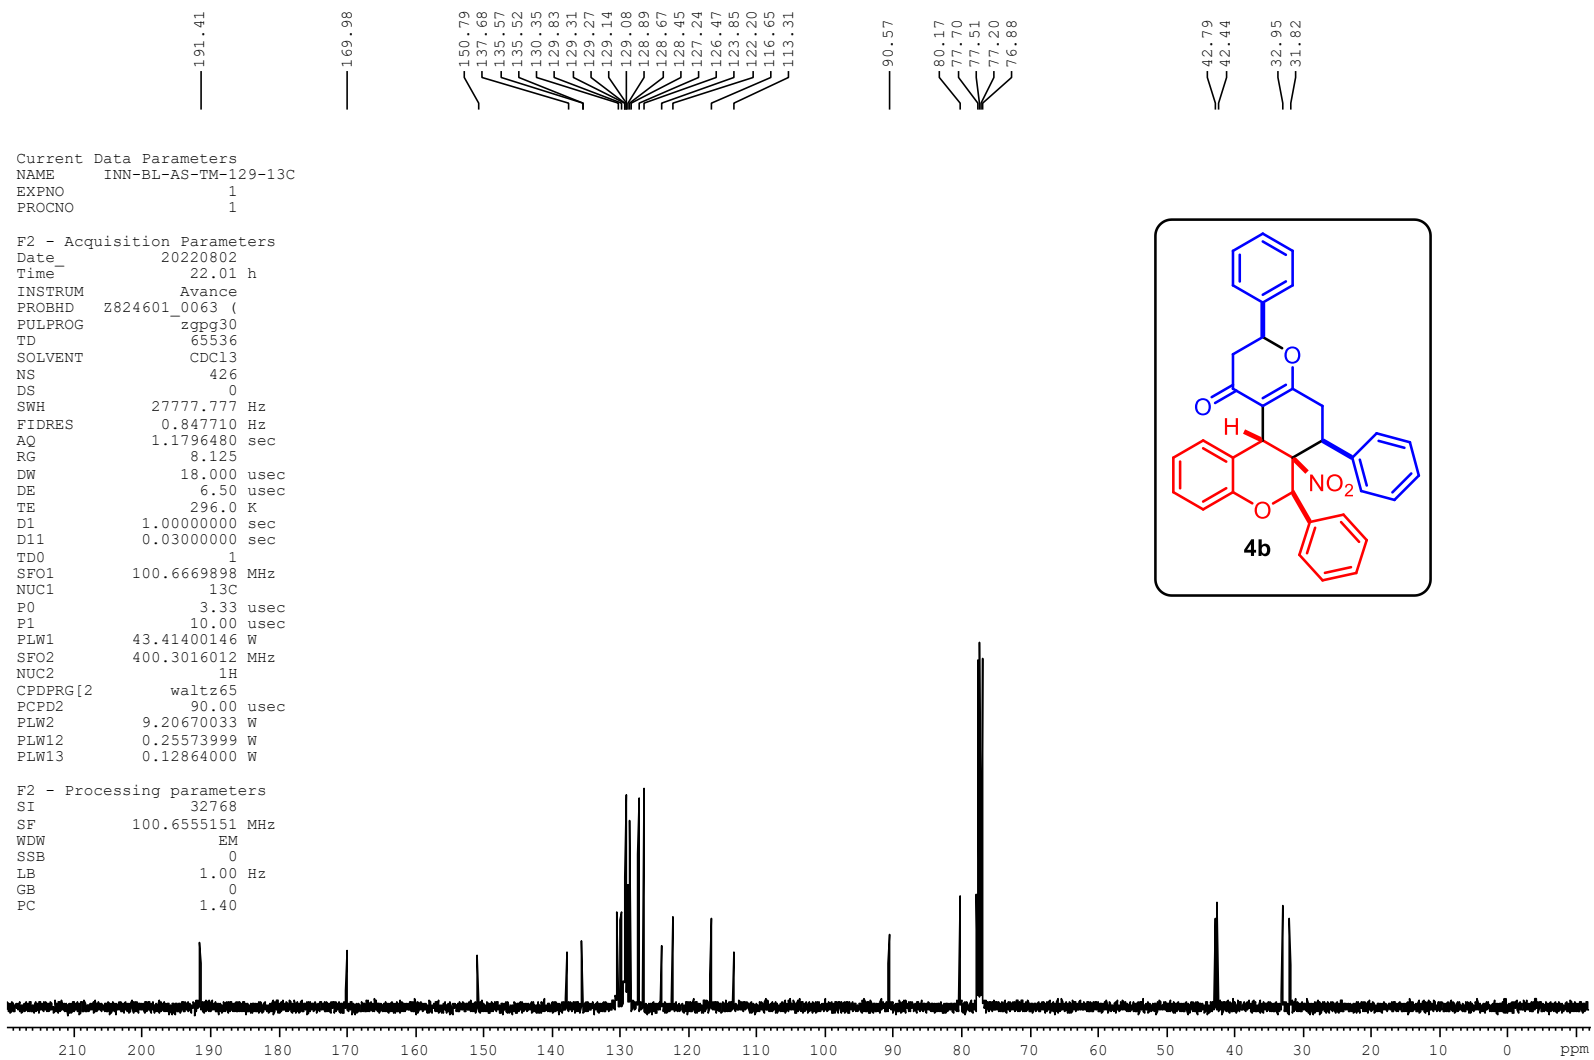

Figure S49. <sup>13</sup>C NMR Spectrum of 4b

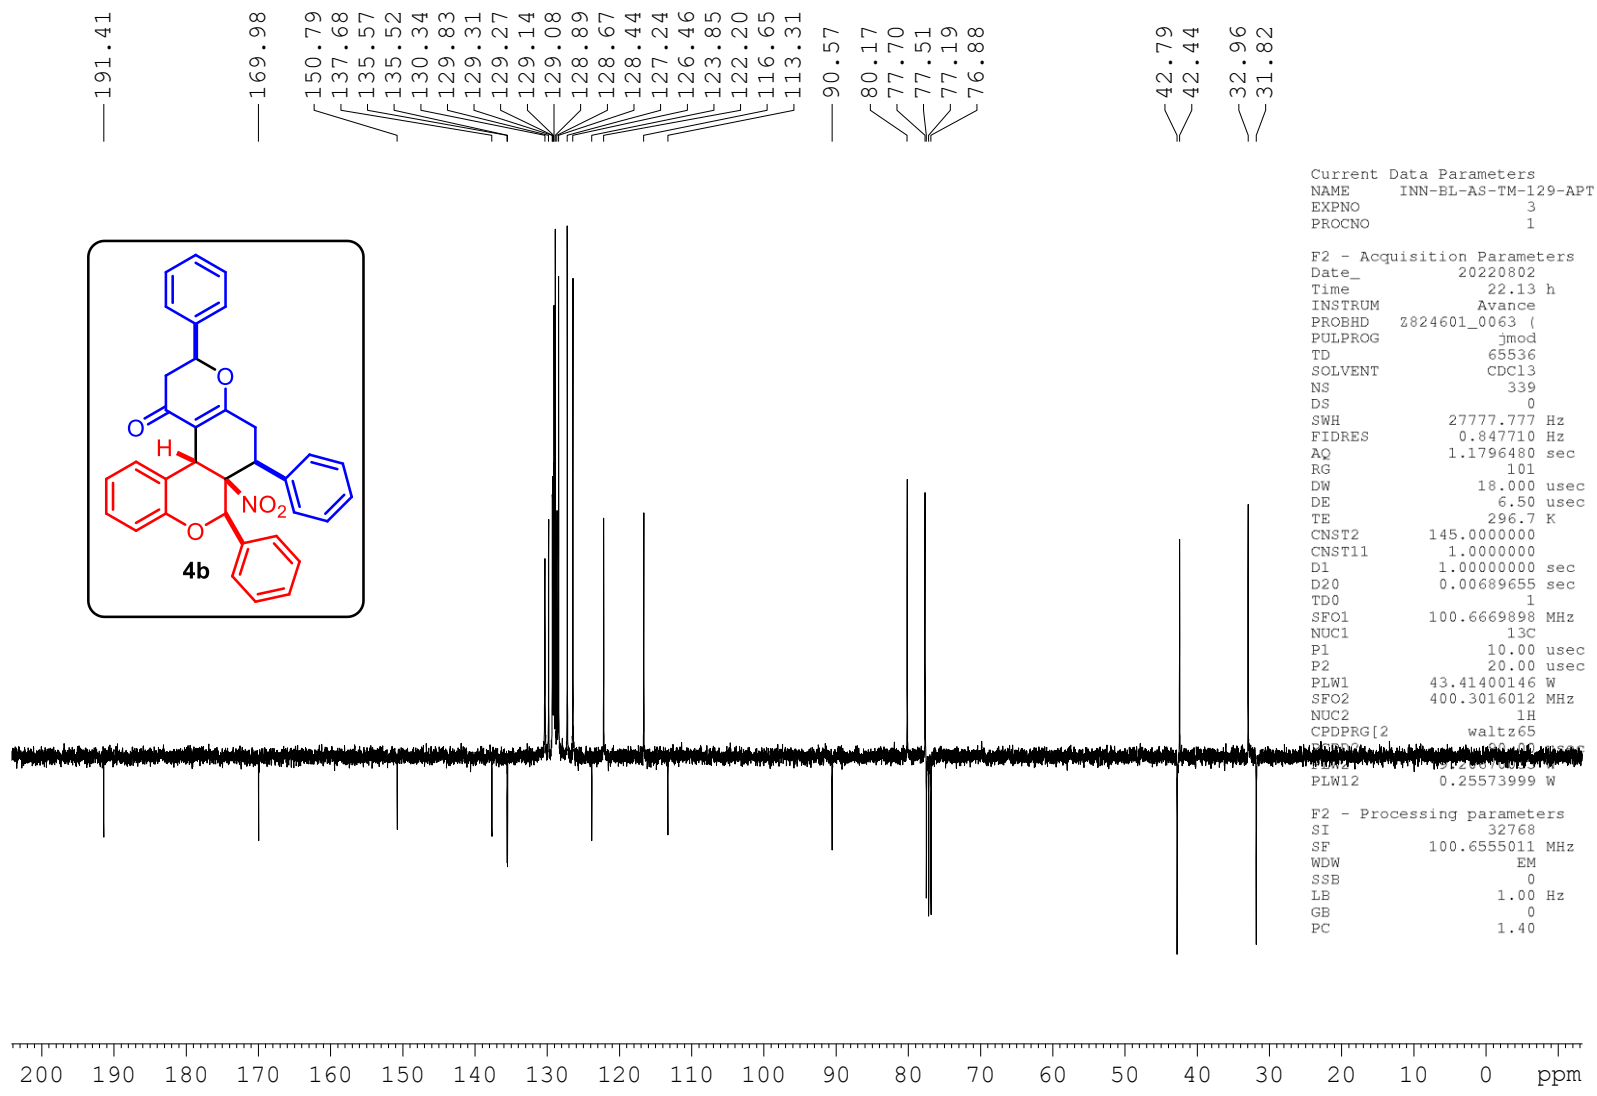

Figure S50. <sup>13</sup>C-APT NMR Spectrum of 4b

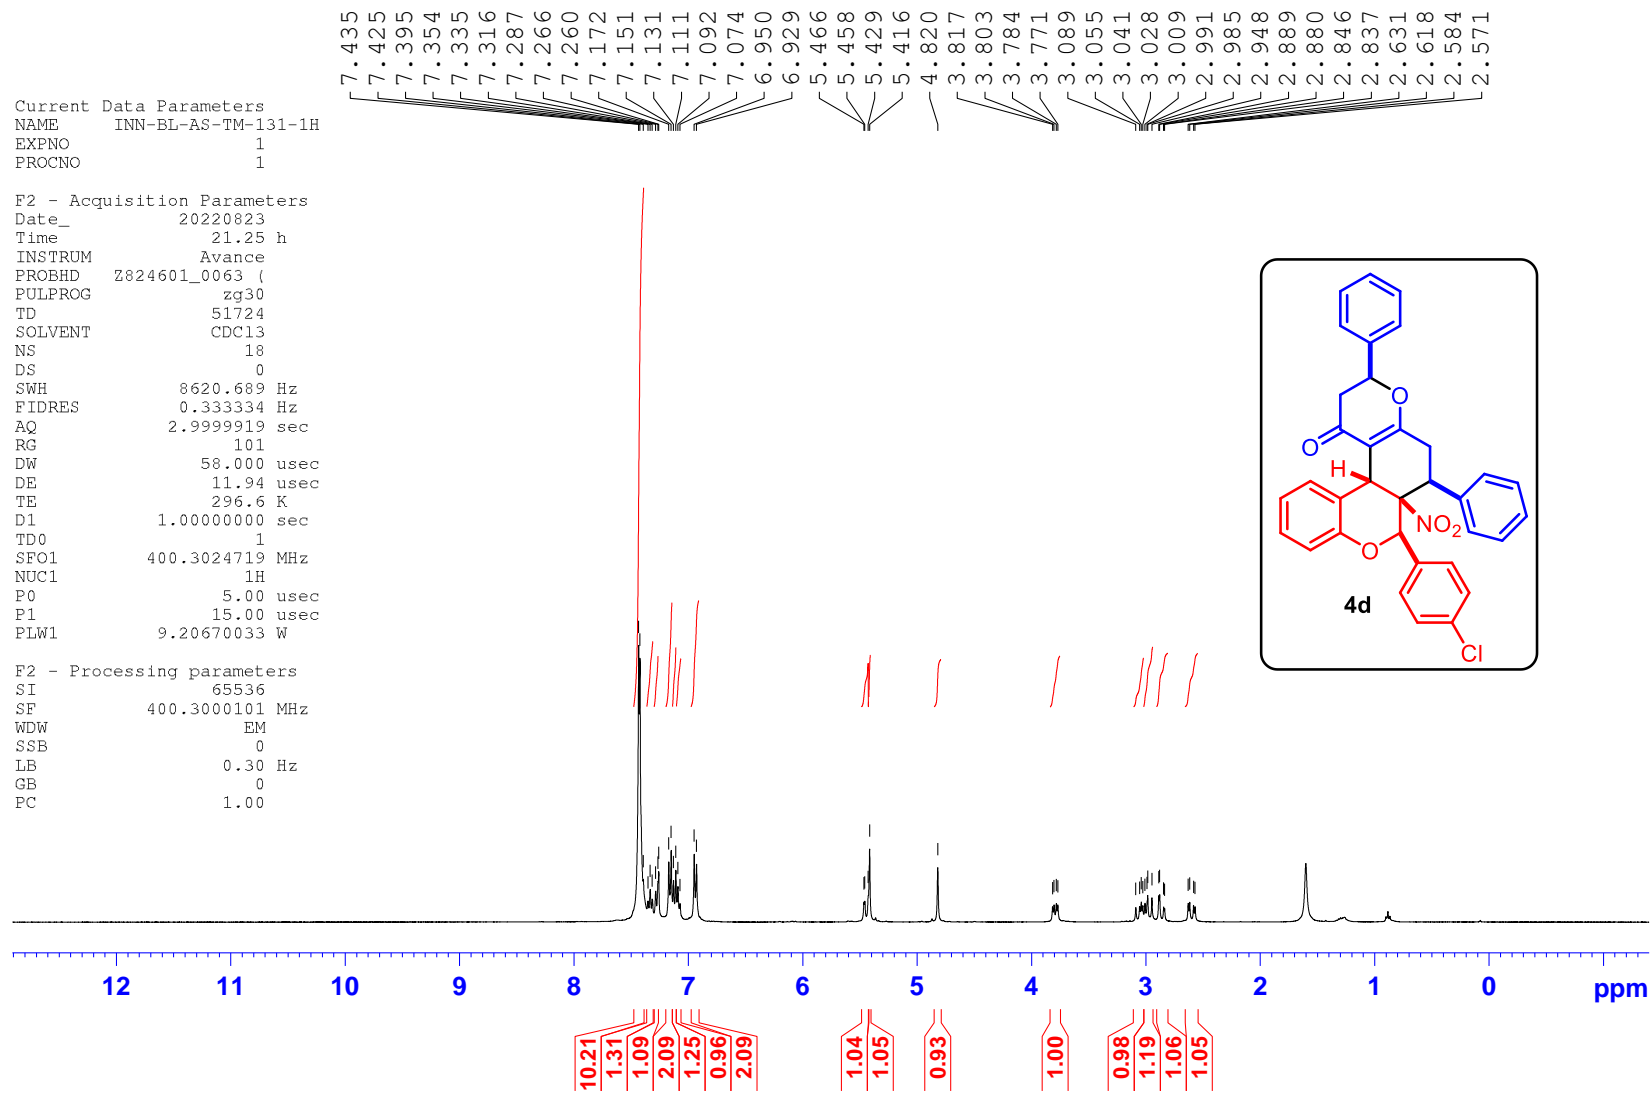

Figure S51. <sup>1</sup>H NMR Spectrum of 4d

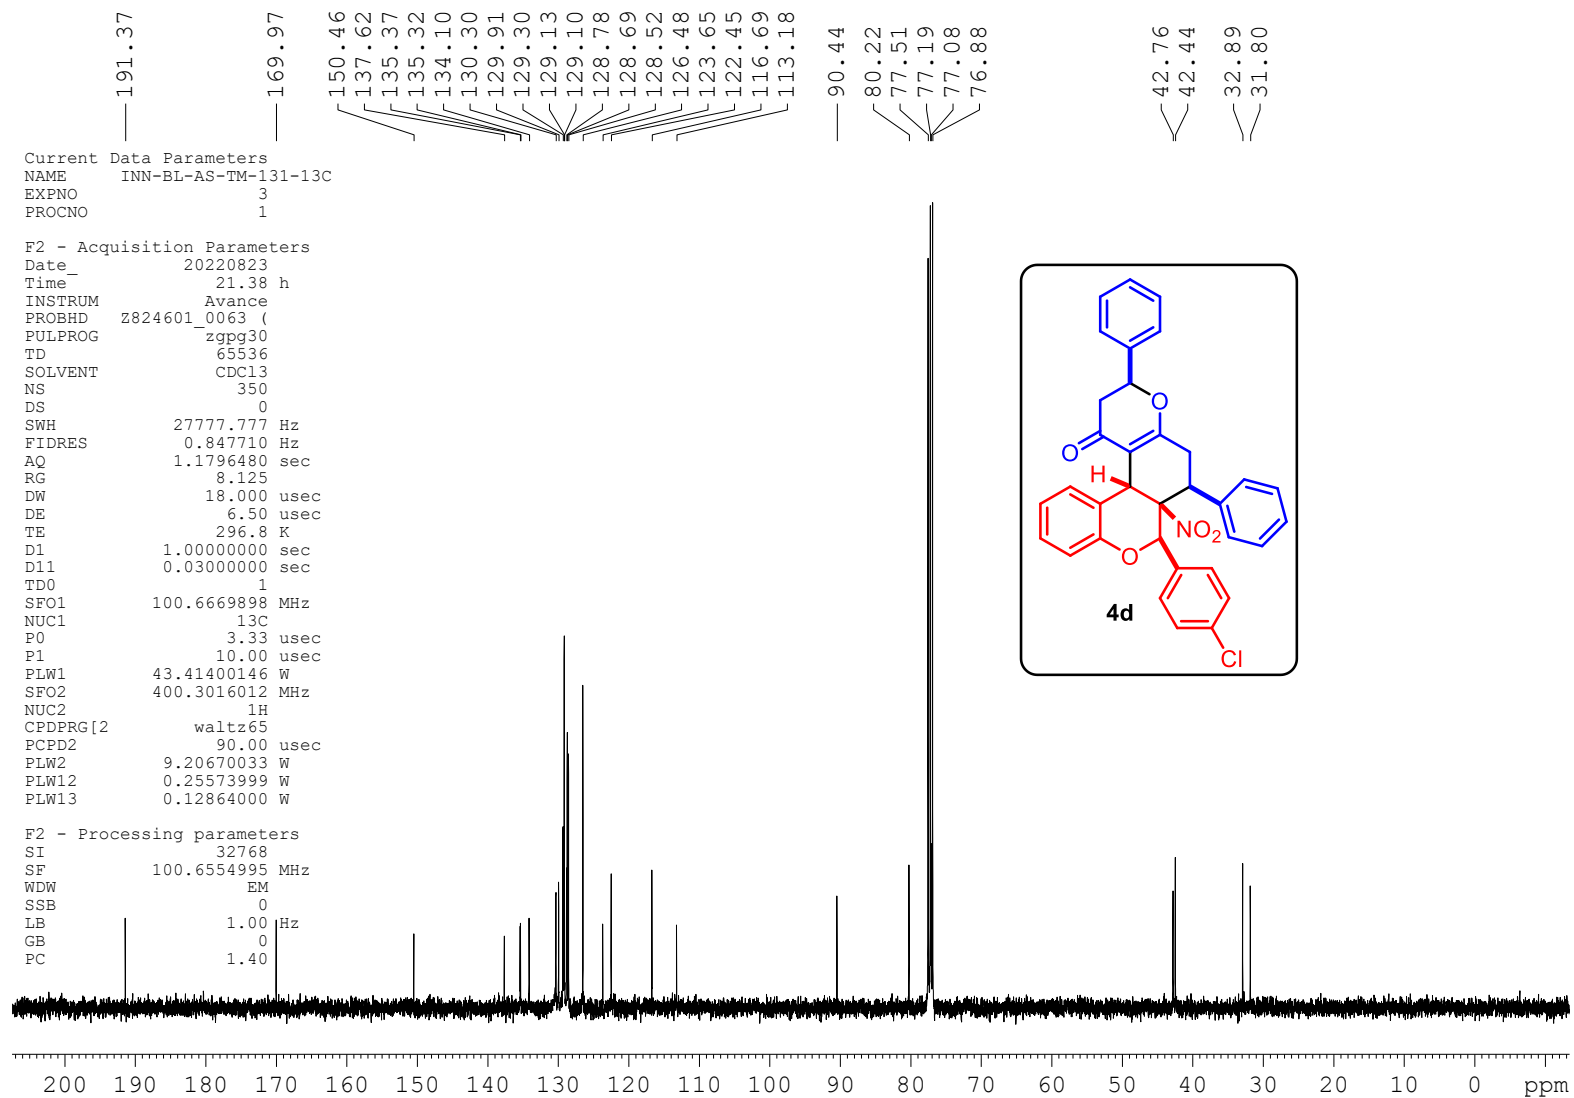

Figure S52. <sup>13</sup>C NMR Spectrum of 4d

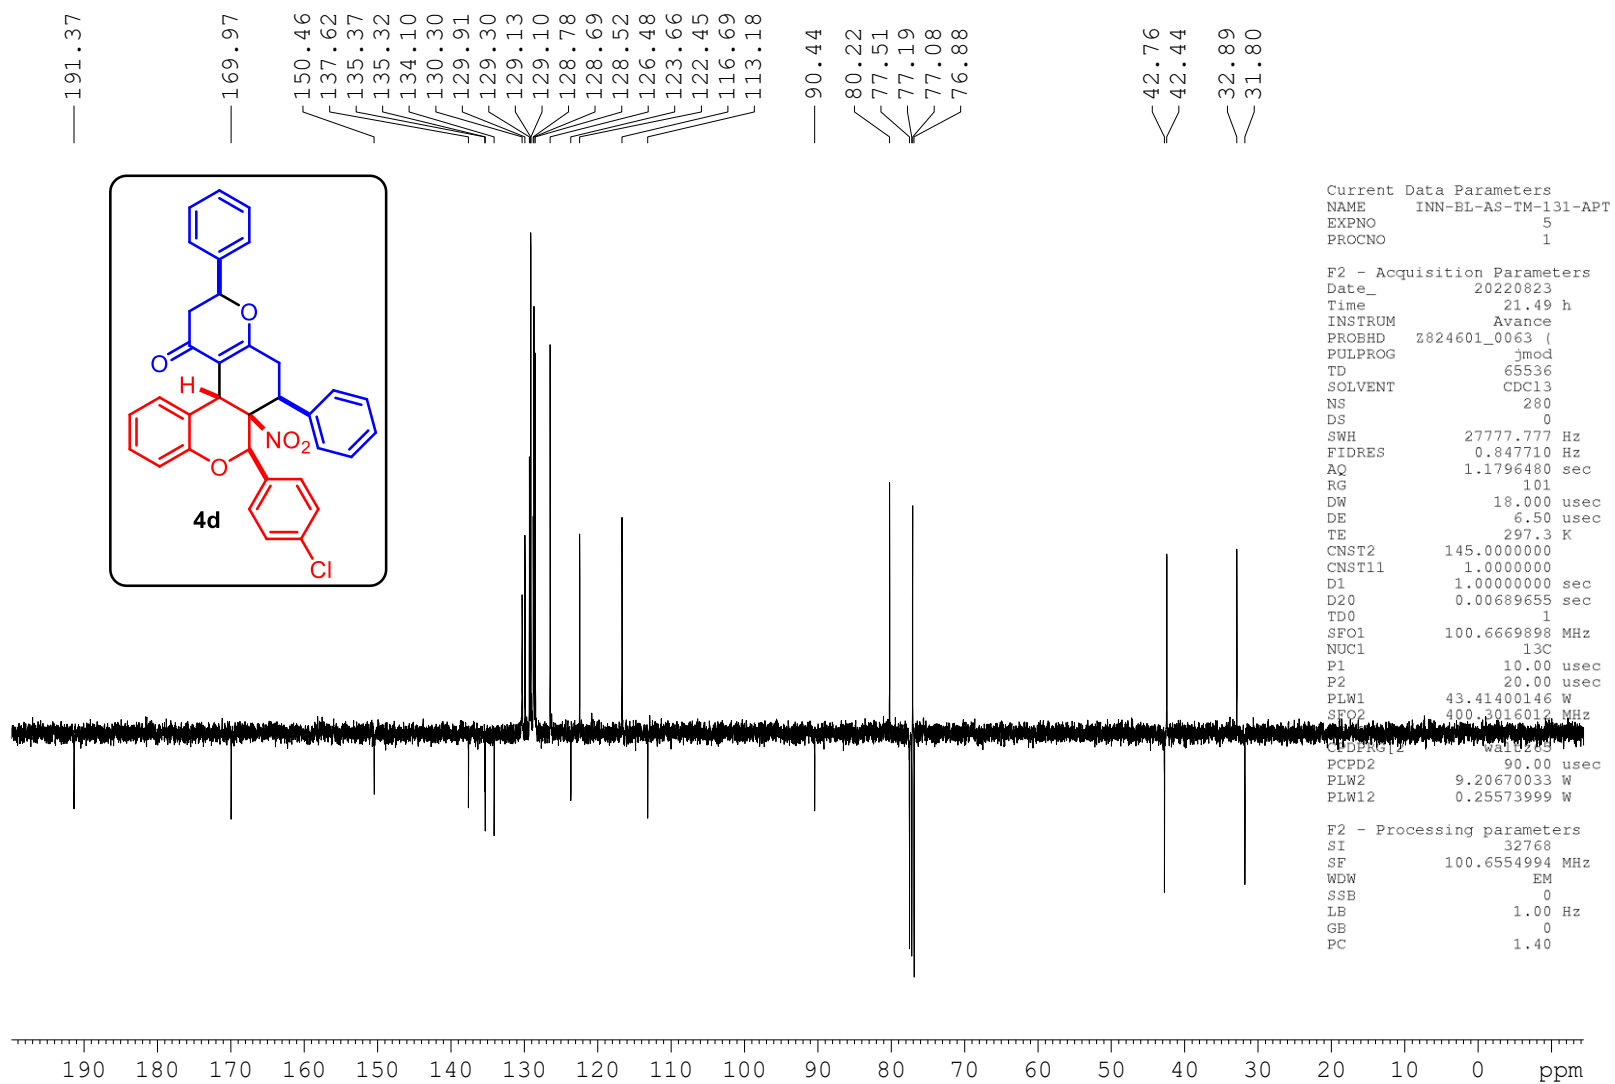

Figure S53. <sup>13</sup>C-APT NMR Spectrum of 4d



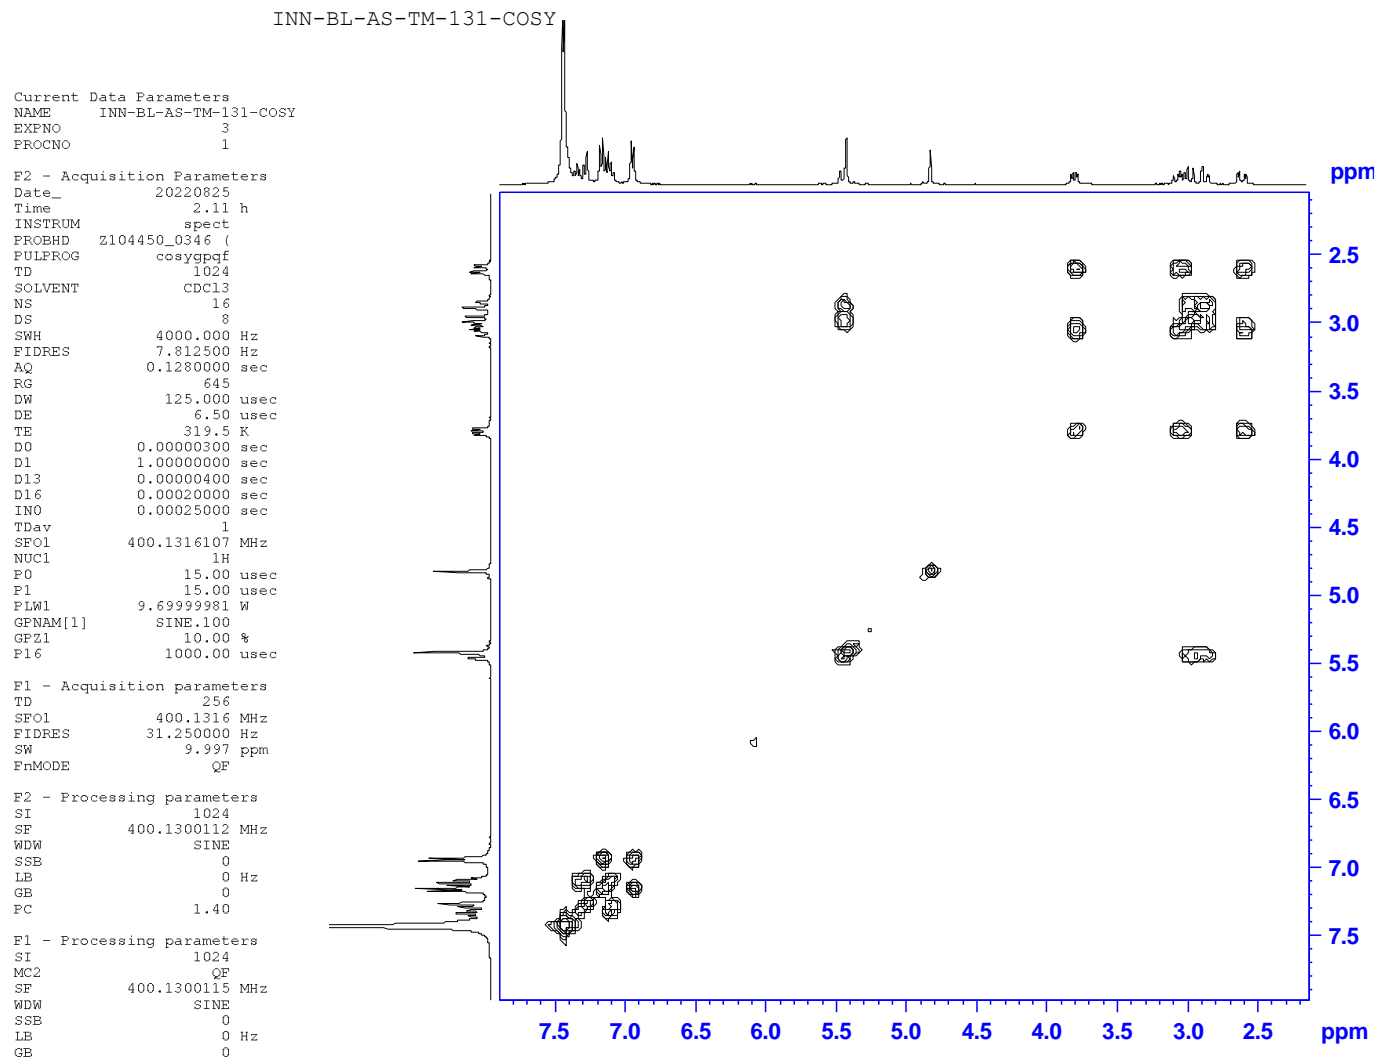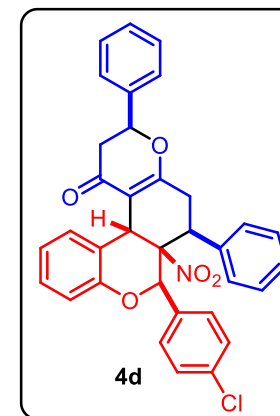

Figure S54.  $^1\text{H}$ - $^1\text{H}$  COSY NMR Spectrum of 4d

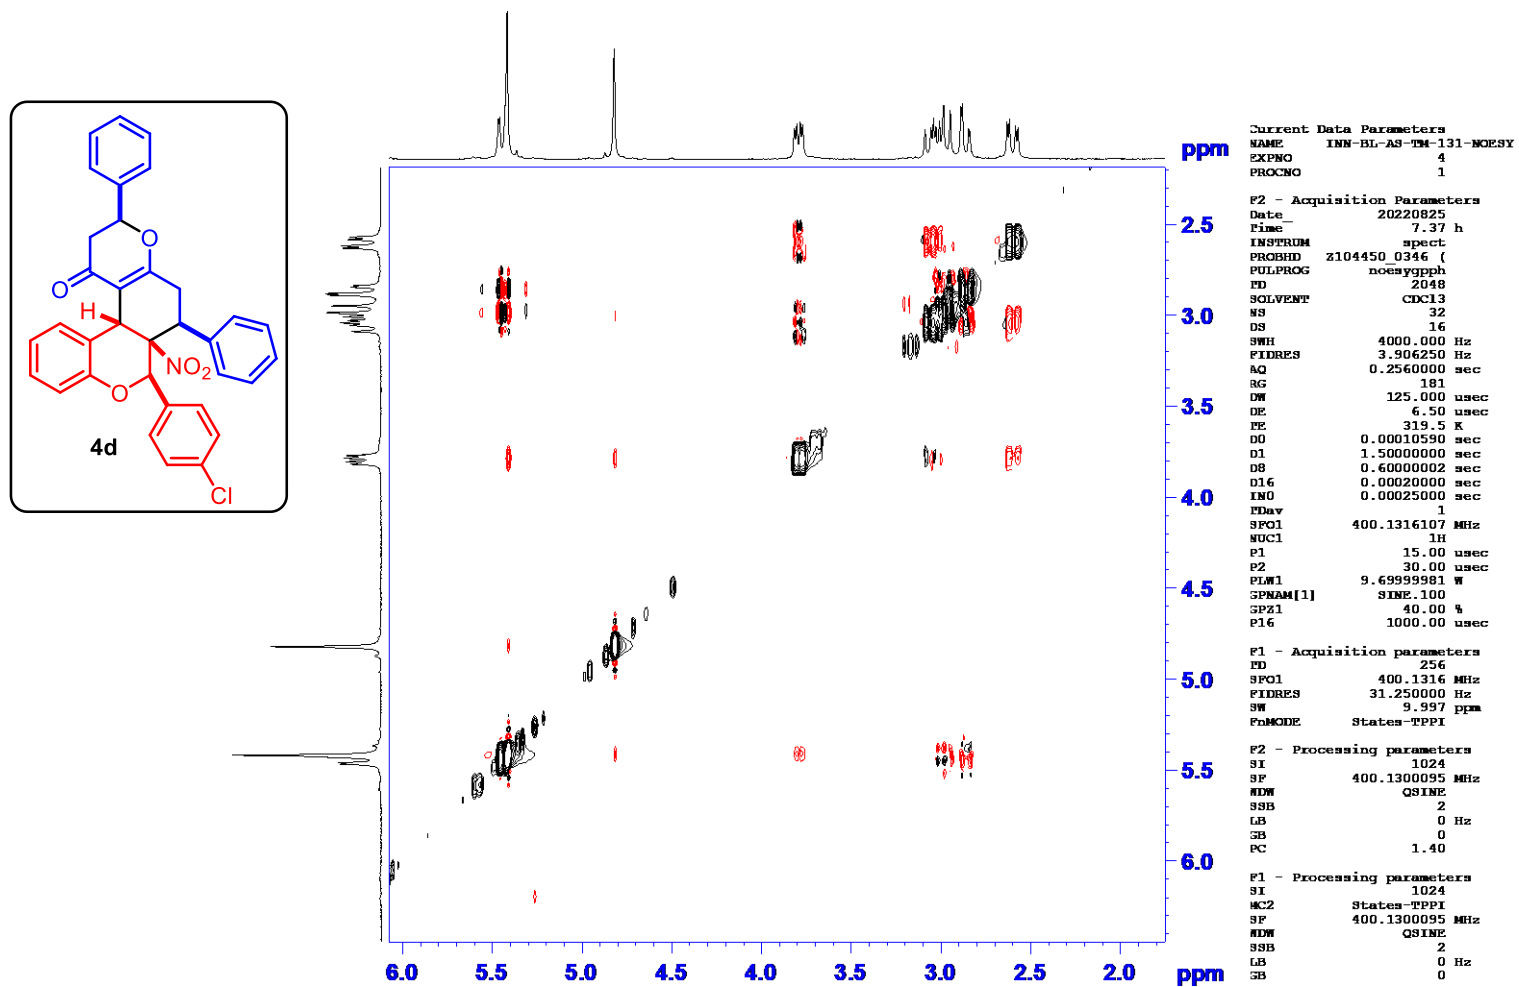

Figure S55.  $^1\text{H}$ - $^1\text{H}$  NOESY NMR Spectrum of 4d

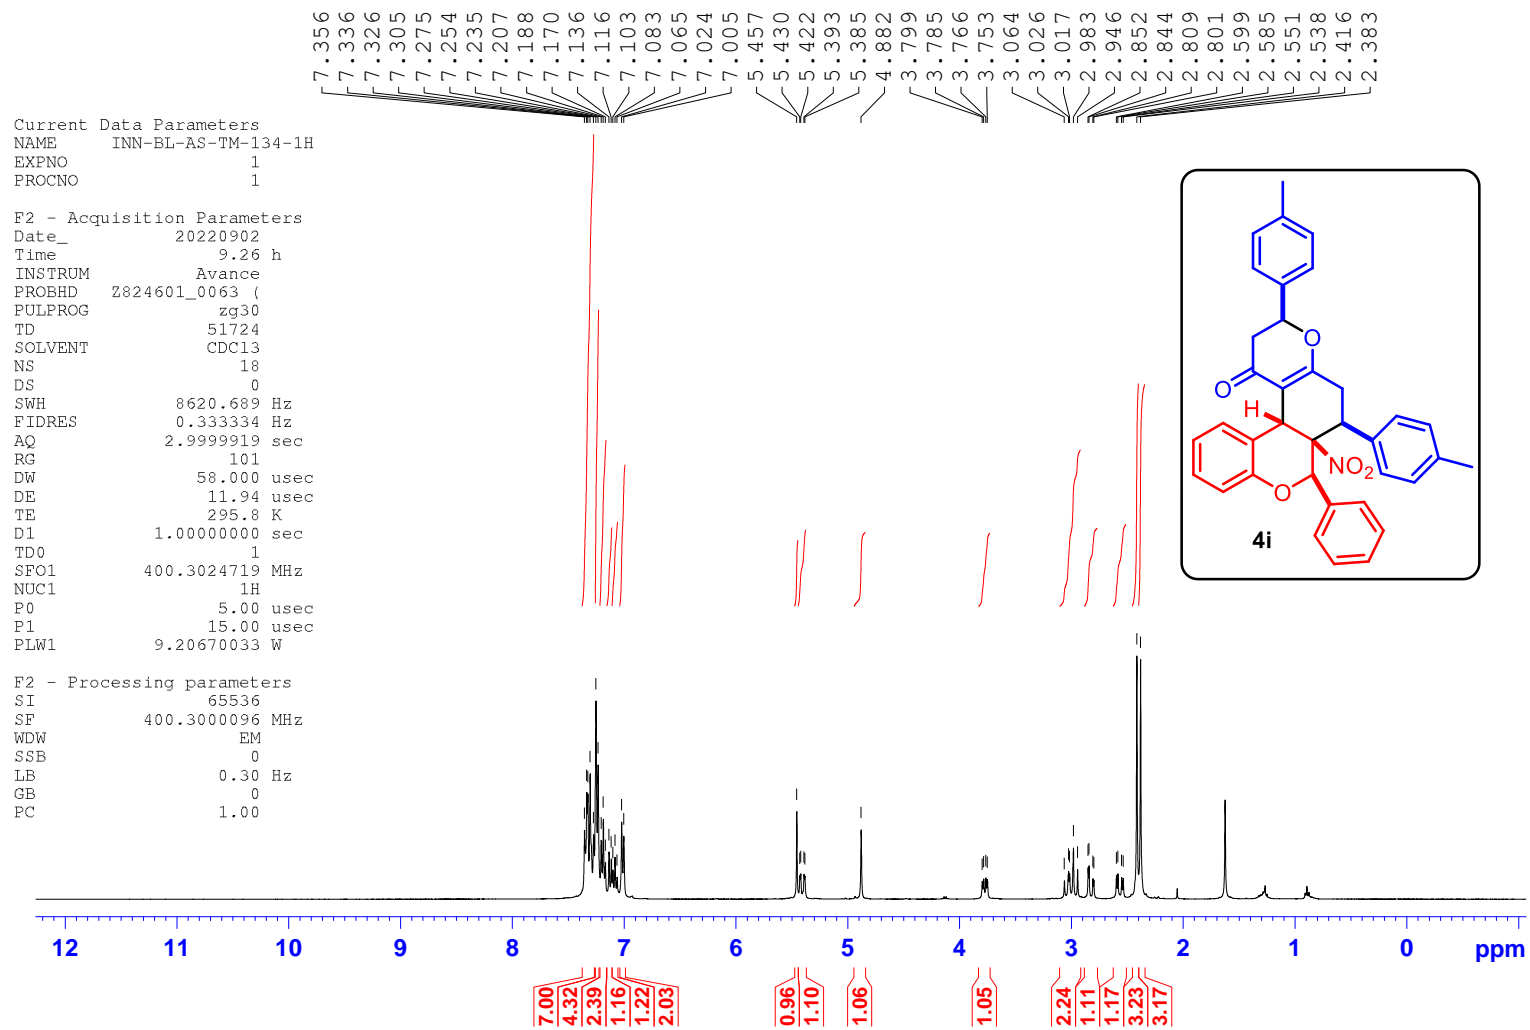

Figure S56. <sup>1</sup>H NMR Spectrum of 4i

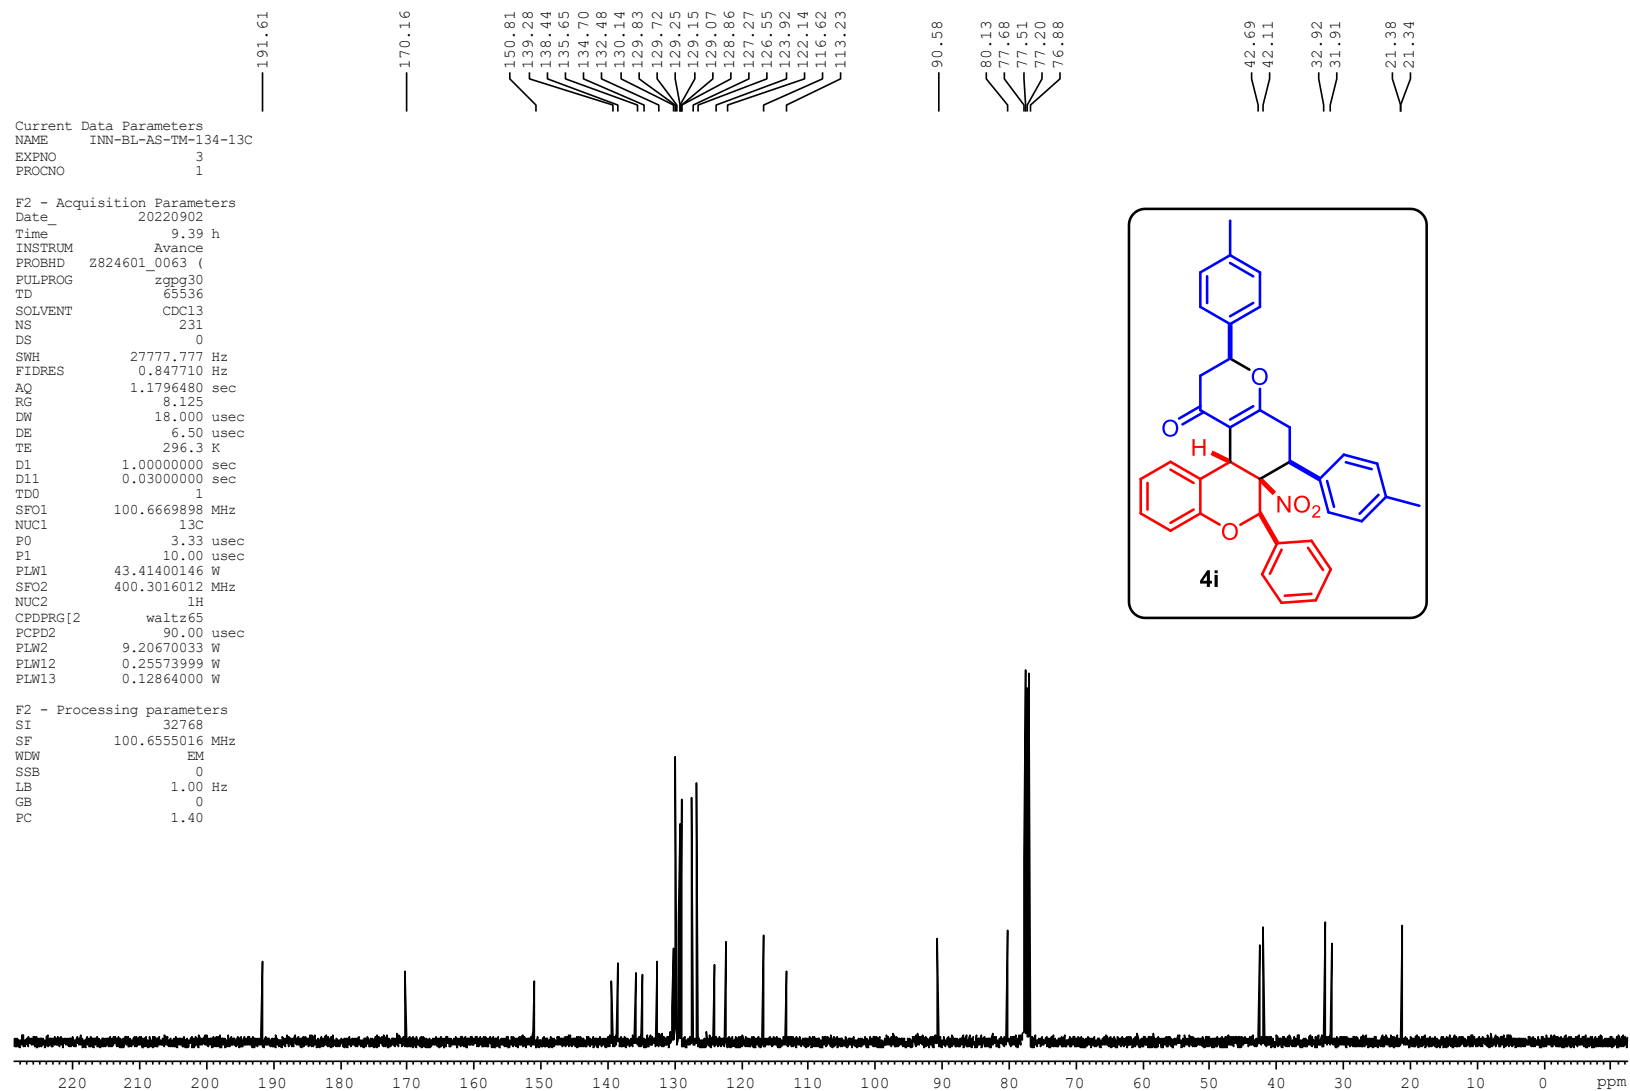

Figure S57. <sup>13</sup>C NMR Spectrum of 4i

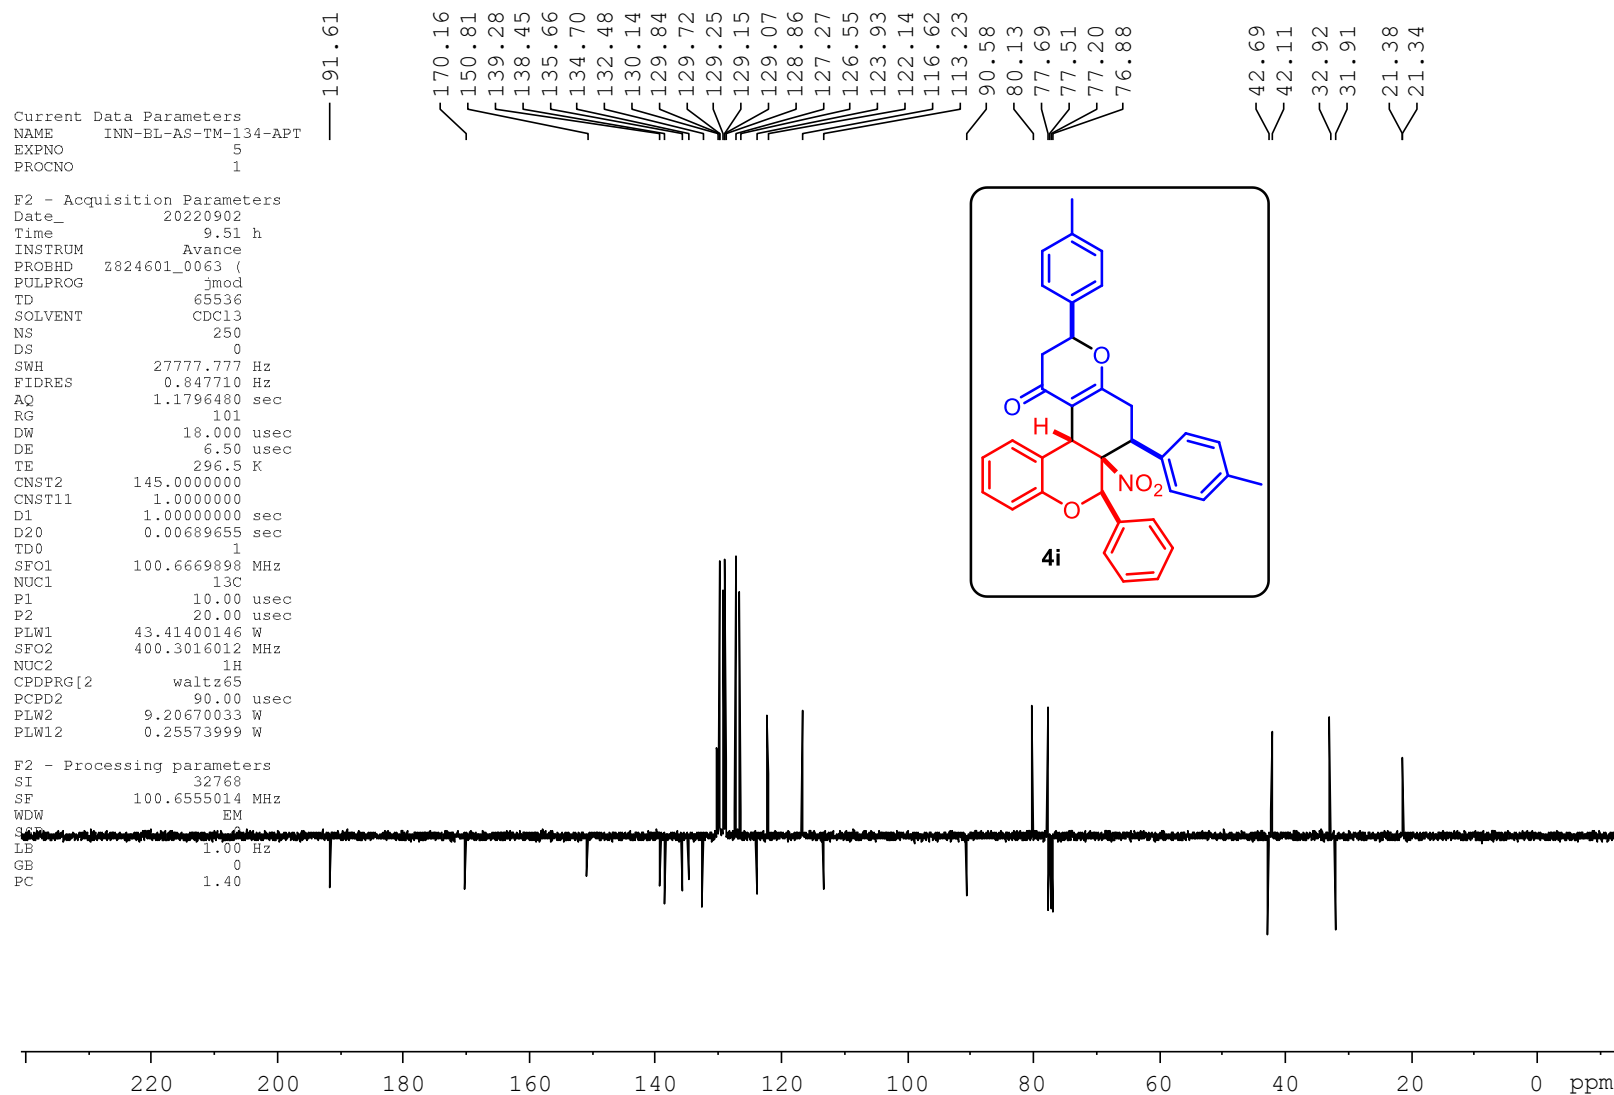

Figure S58. <sup>13</sup>C-APT NMR Spectrum of **4i**

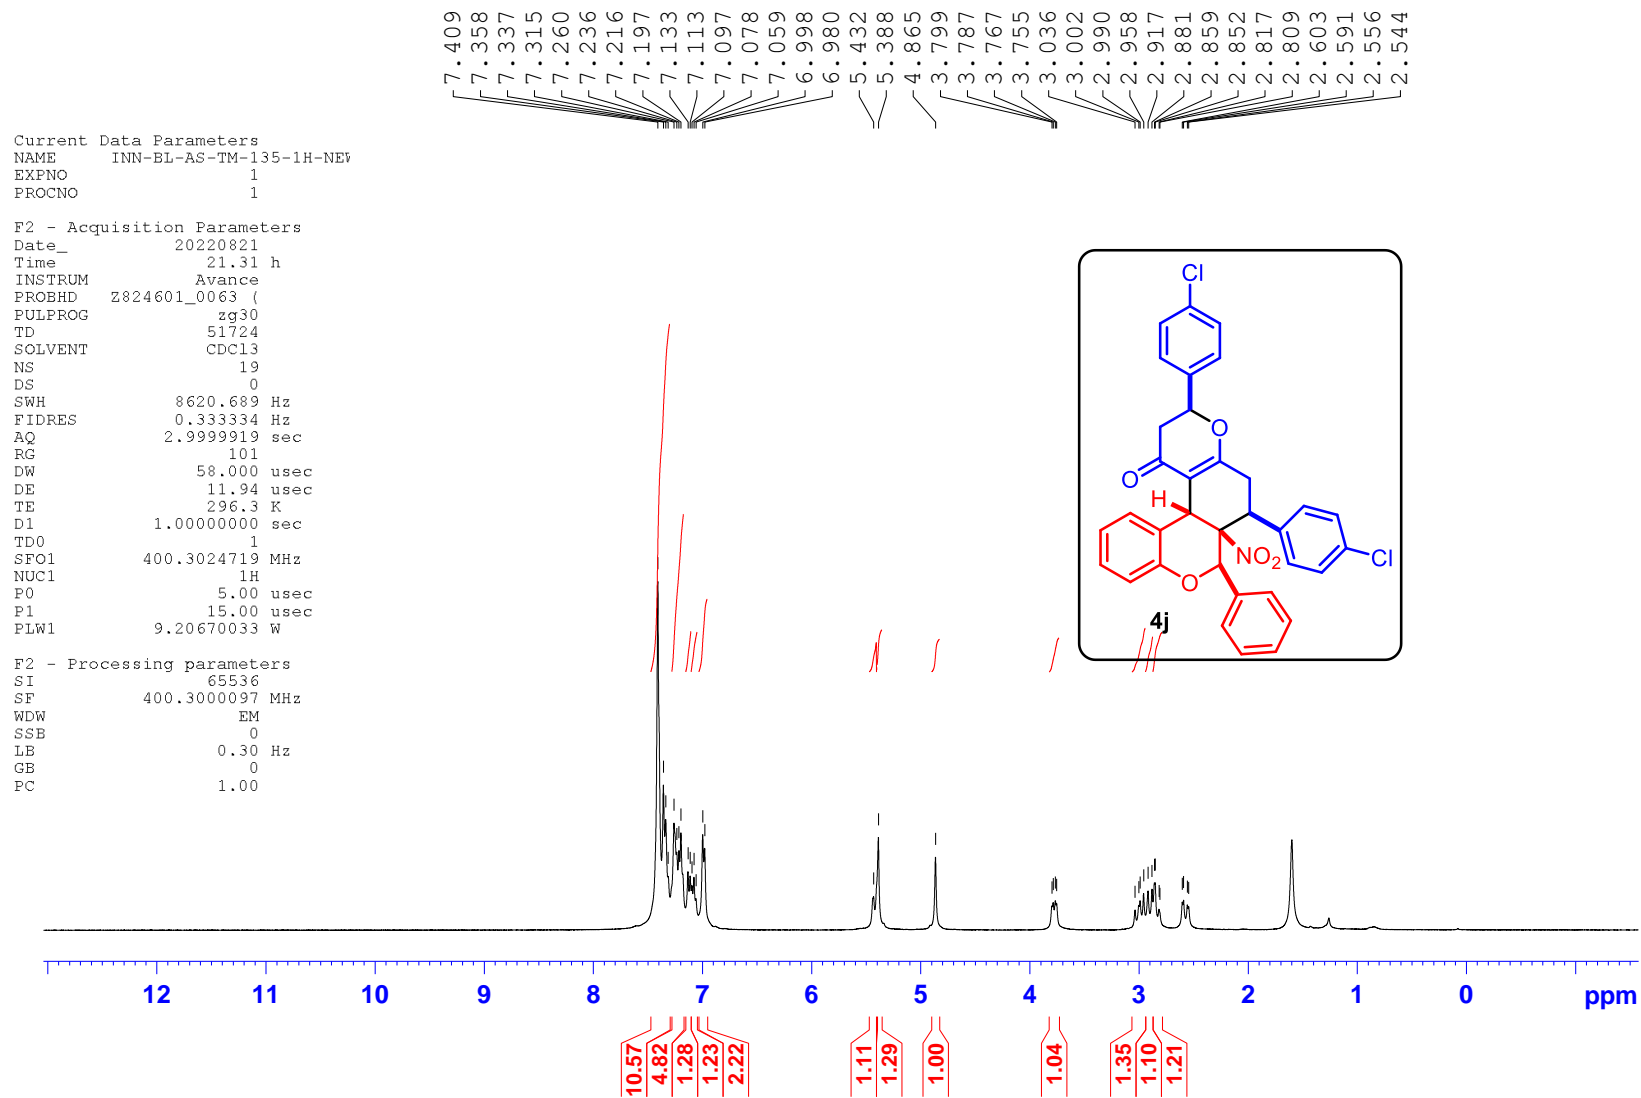

Figure S59. <sup>1</sup>H NMR Spectrum of 4j

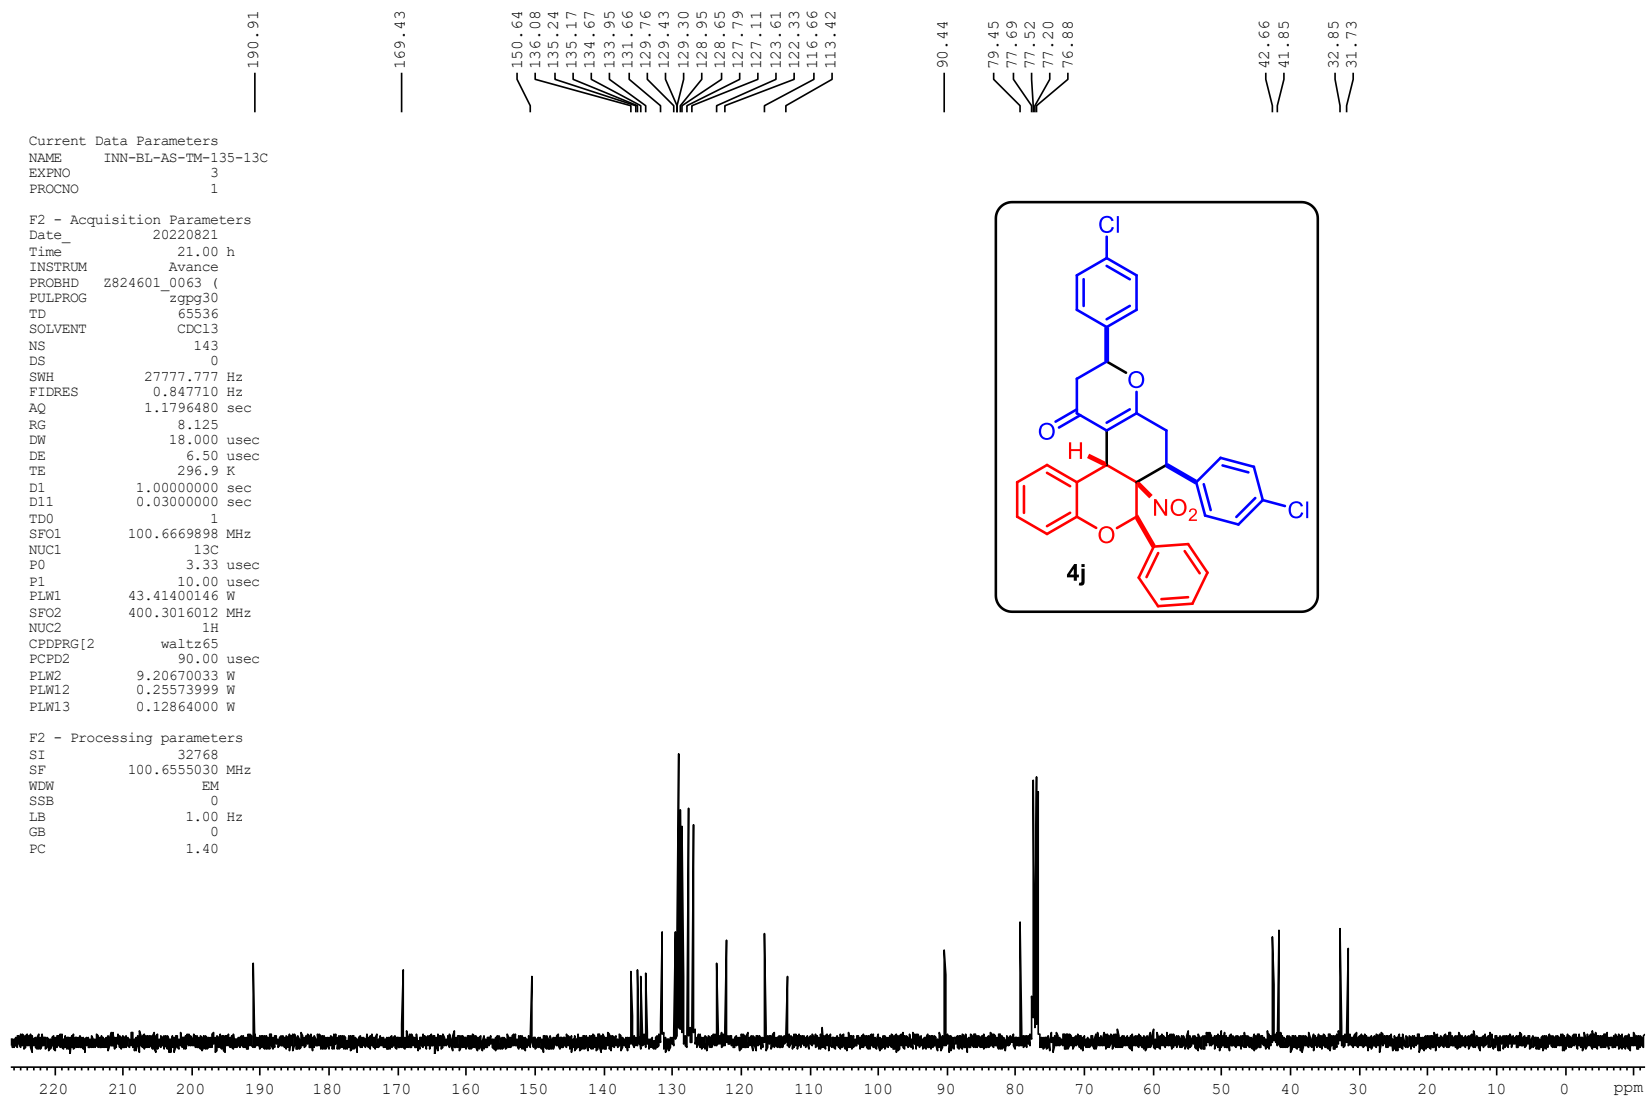

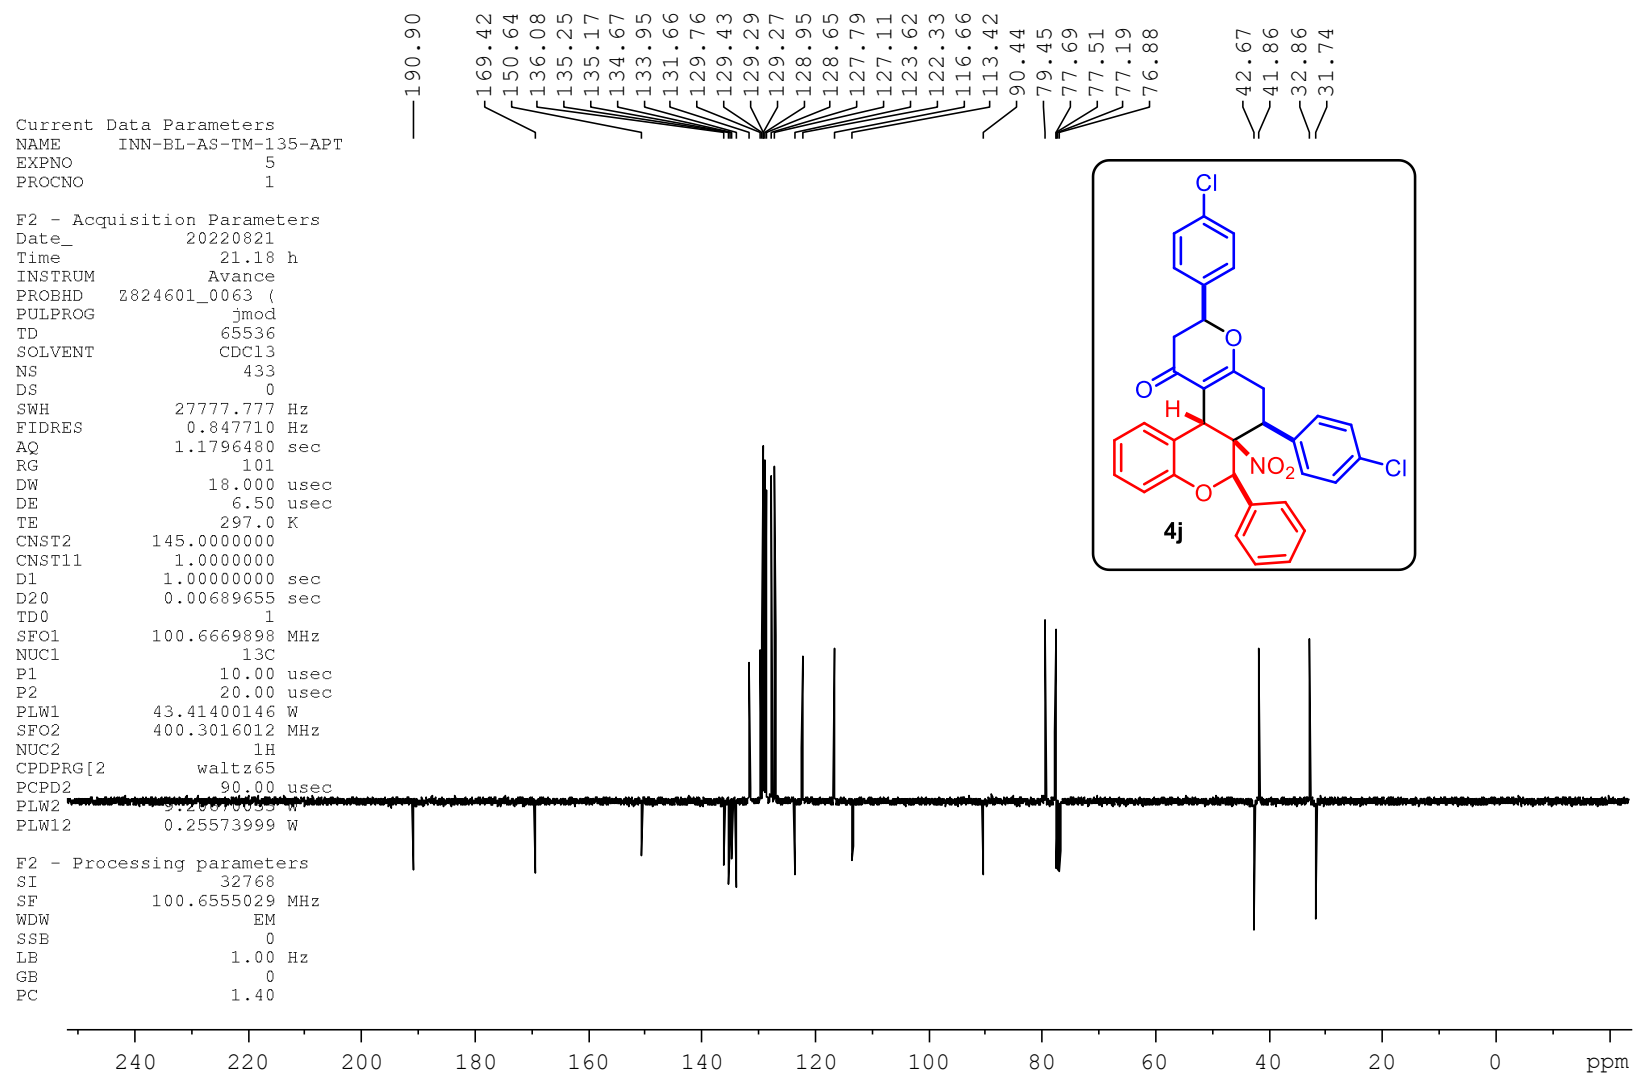

Figure S61. <sup>13</sup>C-APT NMR Spectrum of 4j



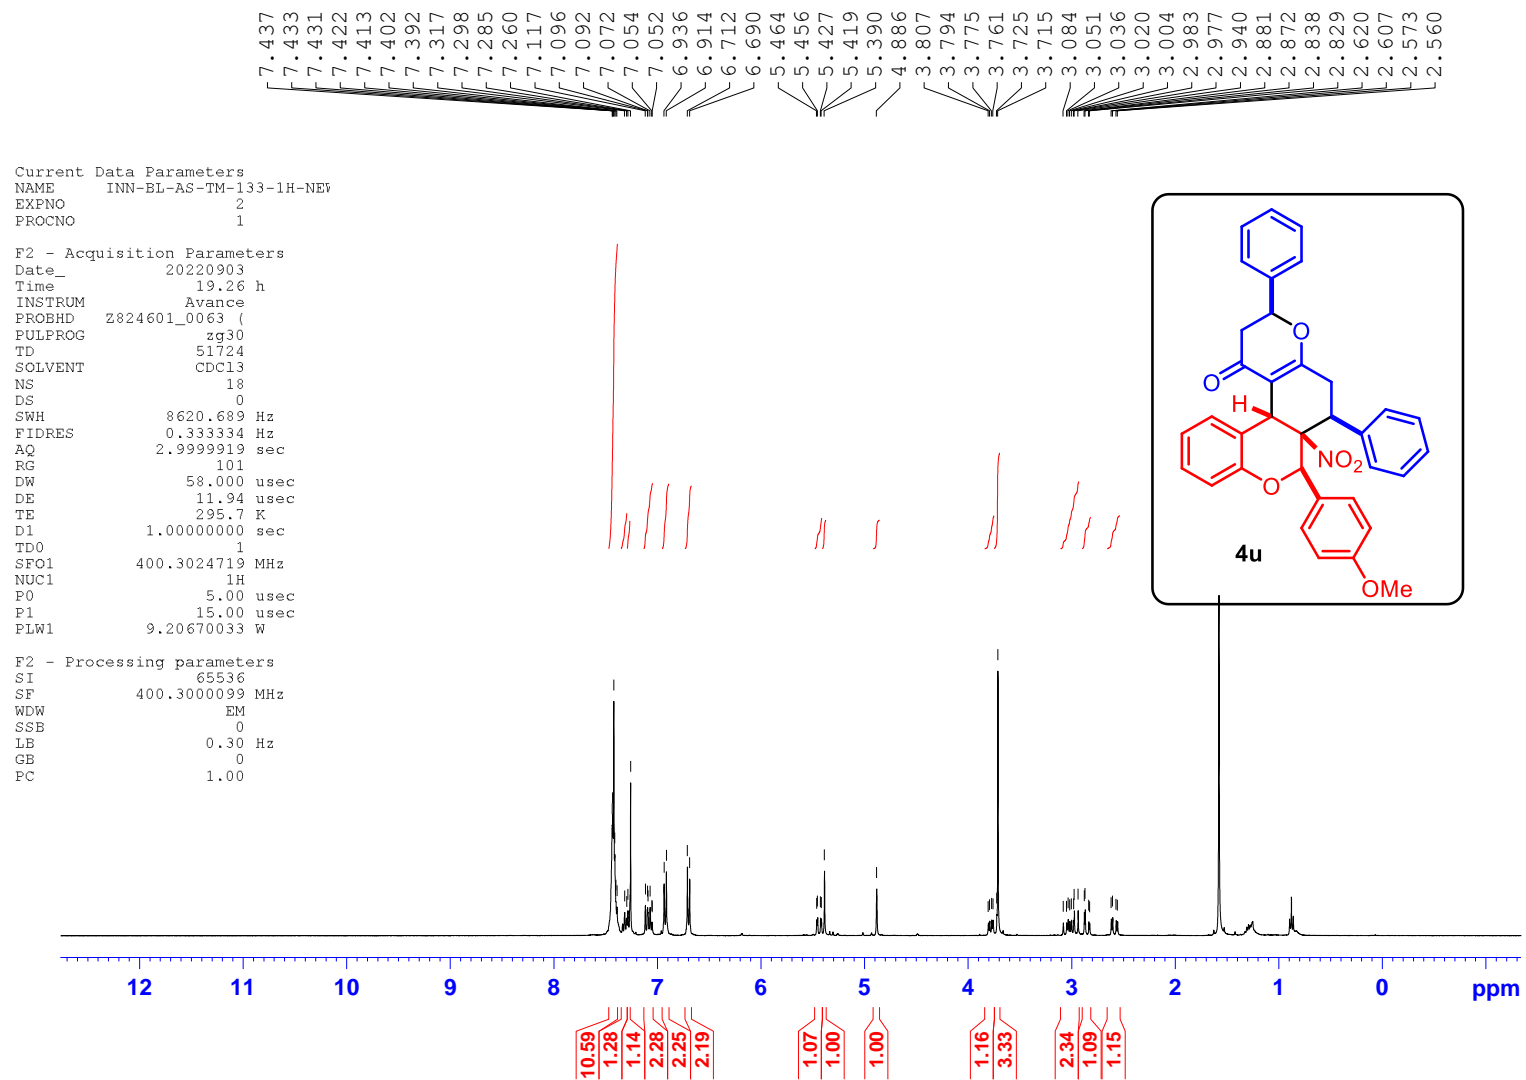

Figure S62. <sup>1</sup>H NMR Spectrum of 4u

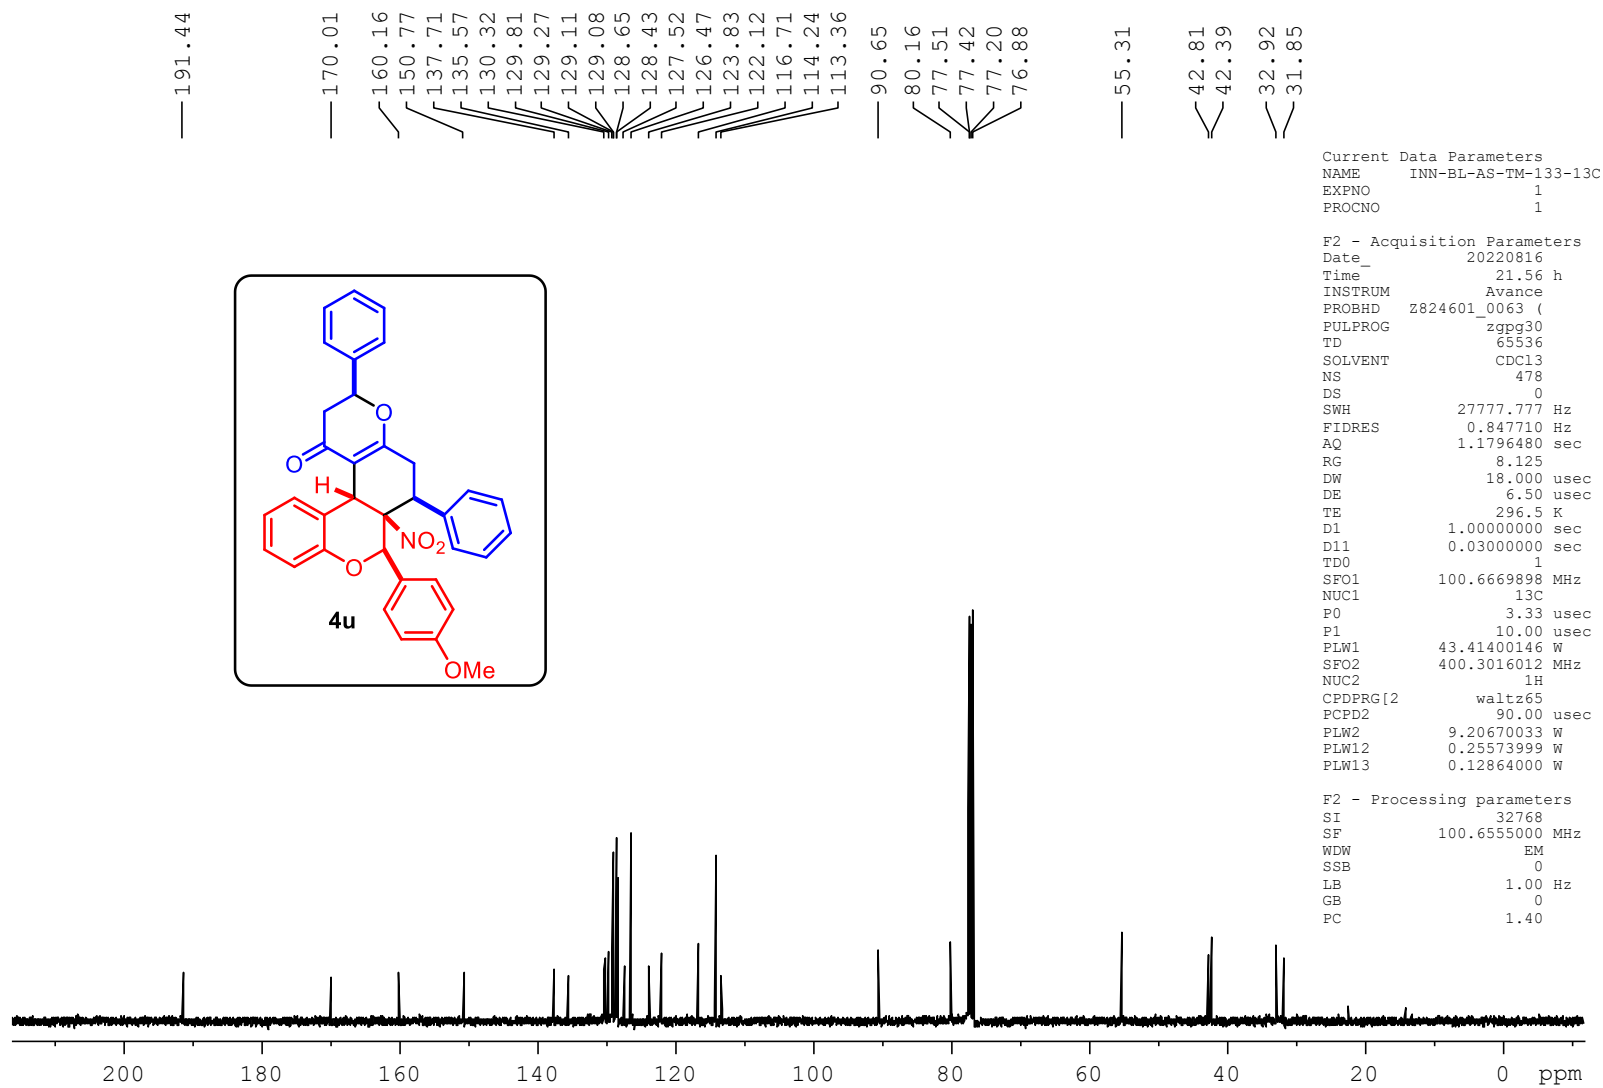

Figure S63. <sup>13</sup>C NMR Spectrum of 4u

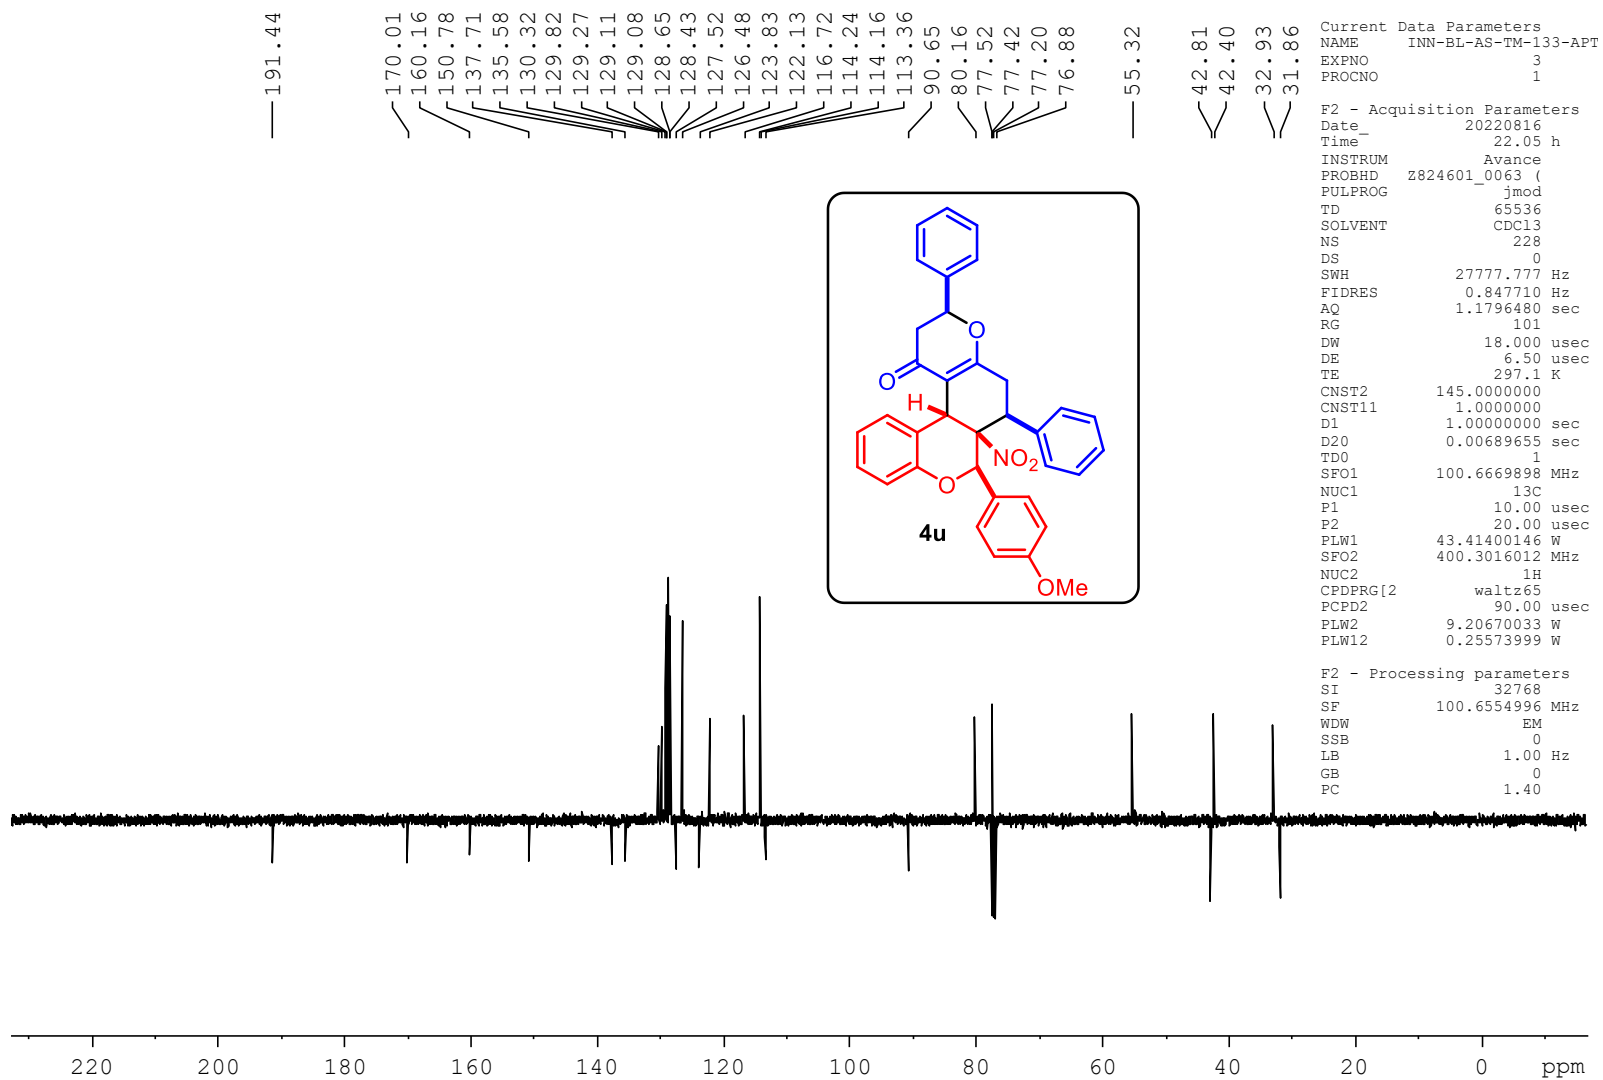

Figure S64. <sup>13</sup>C-APT NMR Spectrum of 4u

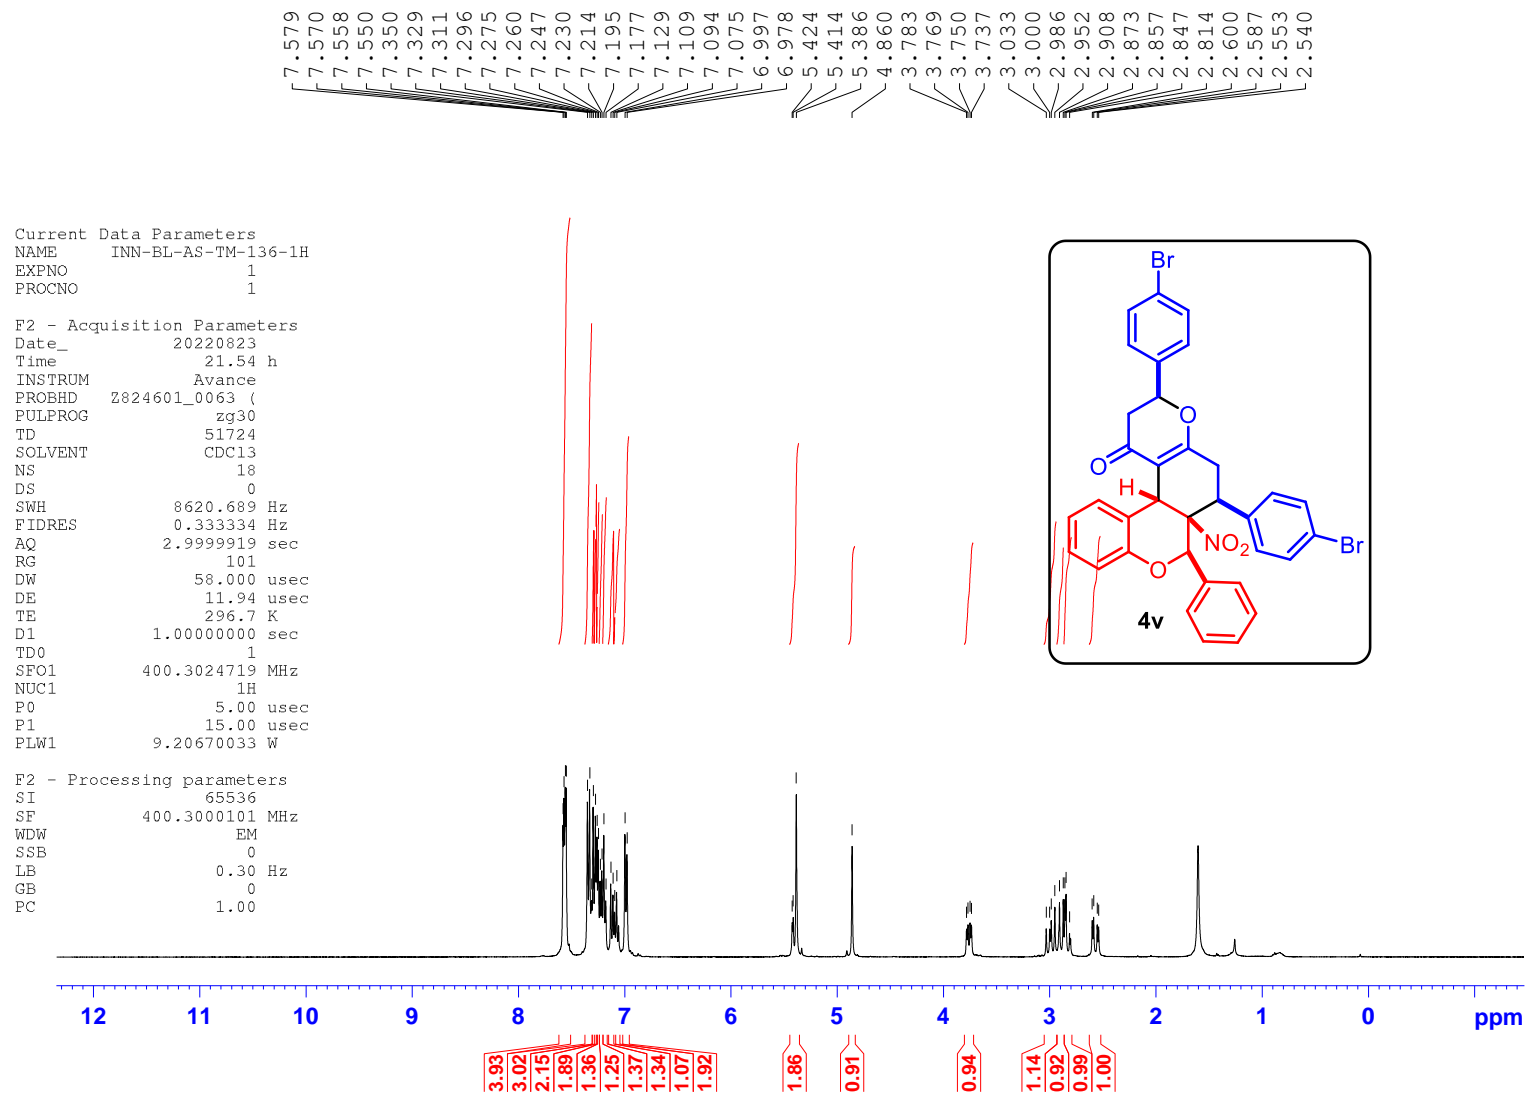

Figure S65. <sup>1</sup>H NMR Spectrum of 4v

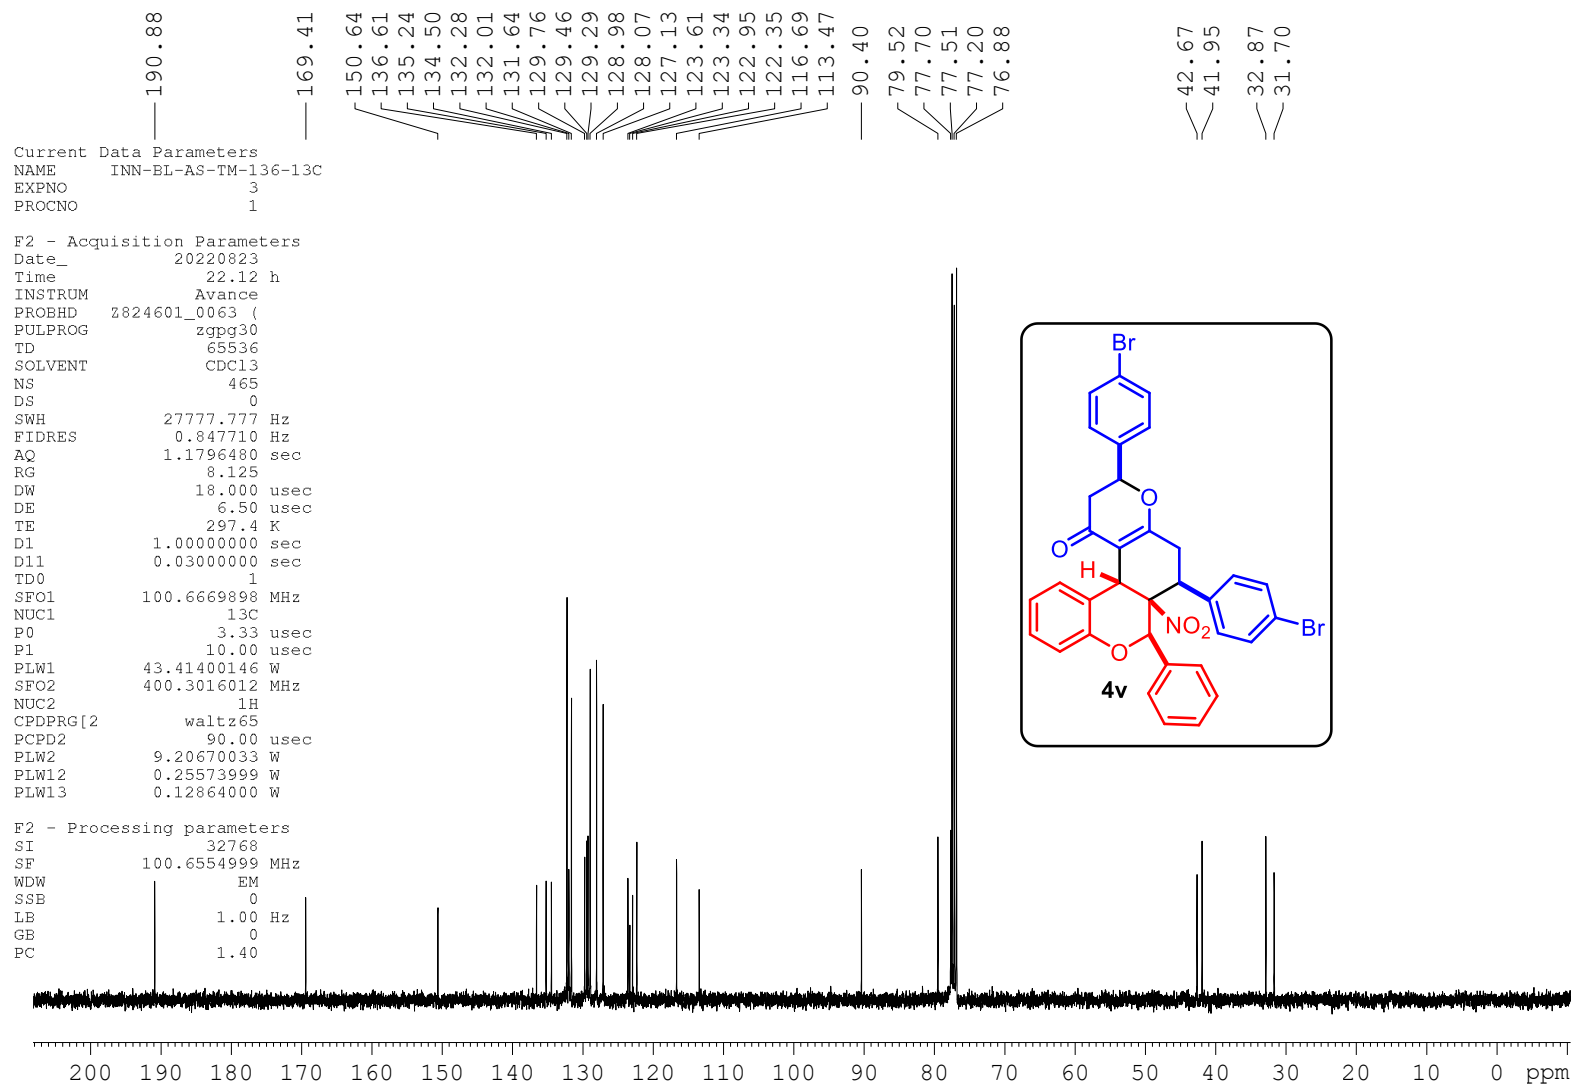

Figure S66.  $^{13}\text{C}$  NMR Spectrum of 4v

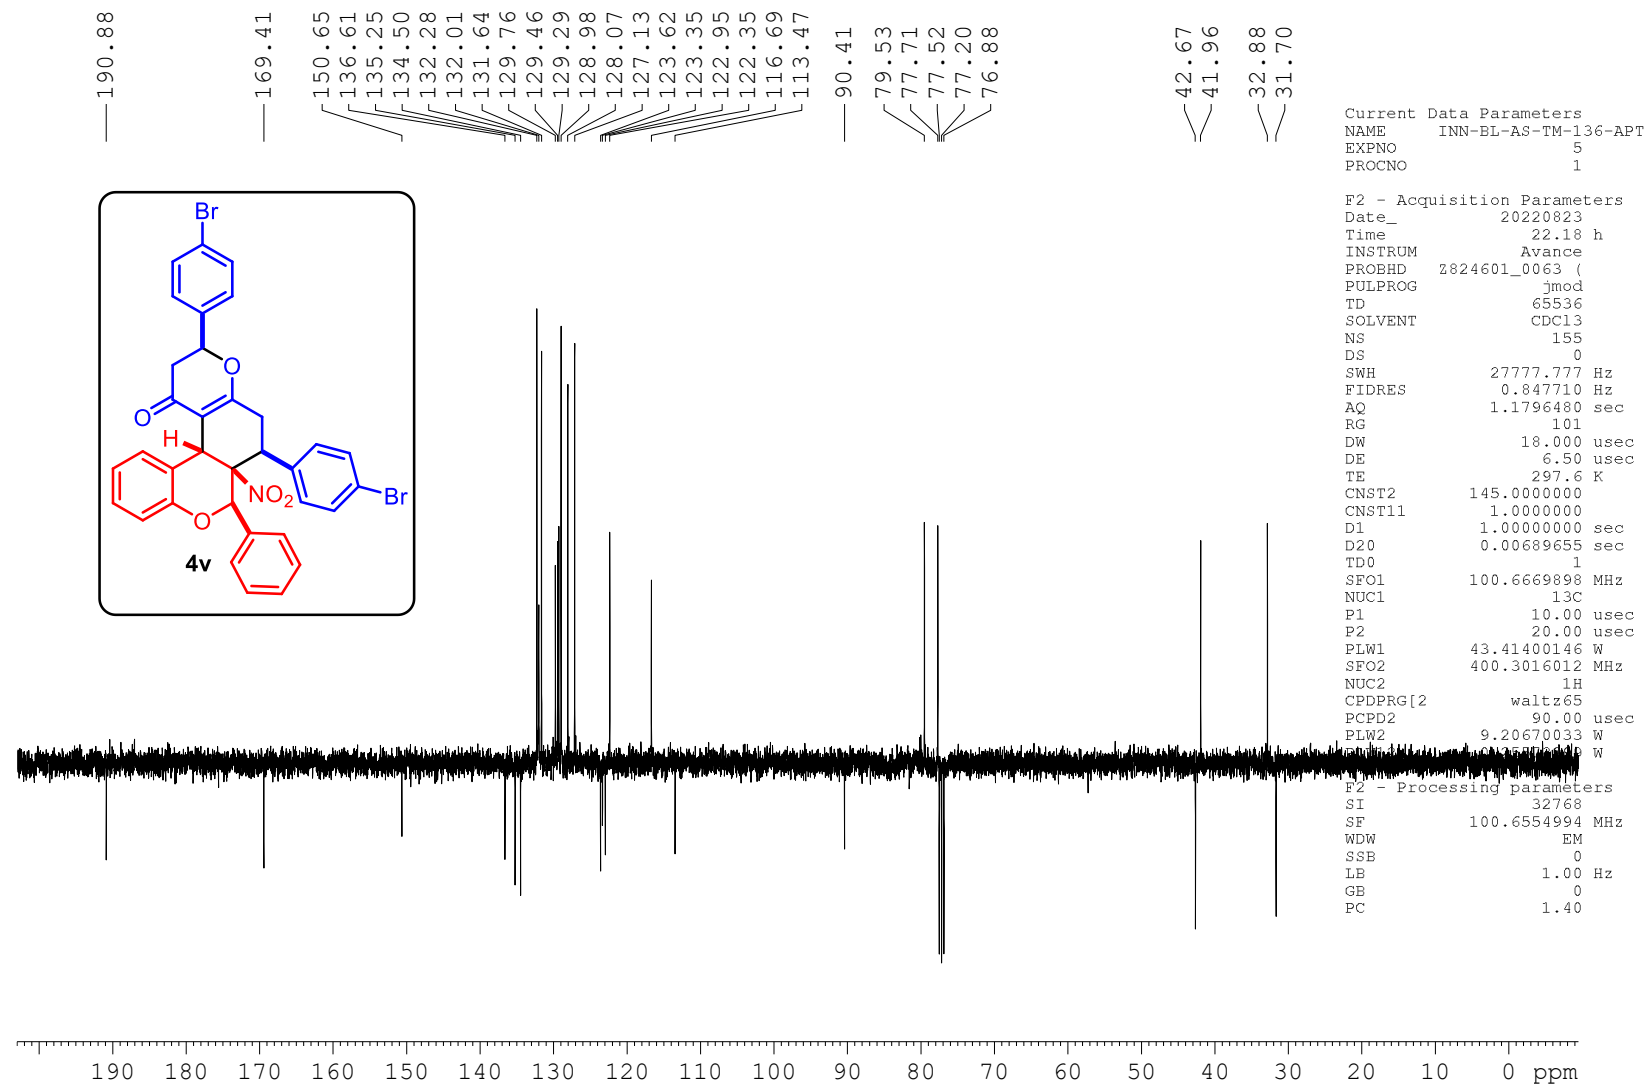

Figure S67. <sup>13</sup>C-APT NMR Spectrum of 4v

Current Data Parameters  
 NAME INN-BL-AS-TM-130-1H  
 EXPNO 3  
 PROCNO 1

F2 - Acquisition Parameters  
 Date\_ 20220730  
 Time 20.39 h  
 INSTRUM Avance  
 PROBHD Z824601\_0063 (  
 PULPROG zg30  
 TD 51724  
 SOLVENT CDC13  
 NS 14  
 DS 0  
 SWH 11904.762 Hz  
 FIDRES 0.460319 Hz  
 AQ 2.1724081 sec  
 RG 101  
 DW 42.000 usec  
 DE 7.94 usec  
 TE 296.0 K  
 D1 1.00000000 sec  
 TD0 1  
 SFO1 400.3040030 MHz  
 NUC1 1H  
 P0 5.00 usec  
 P1 15.00 usec  
 PLW1 9.20670033 W

F2 - Processing parameters  
 SI 65536  
 SF 400.3000535 MHz  
 WDW EM  
 SSB 0  
 LB 0.30 Hz  
 GB 0  
 PC 1.00

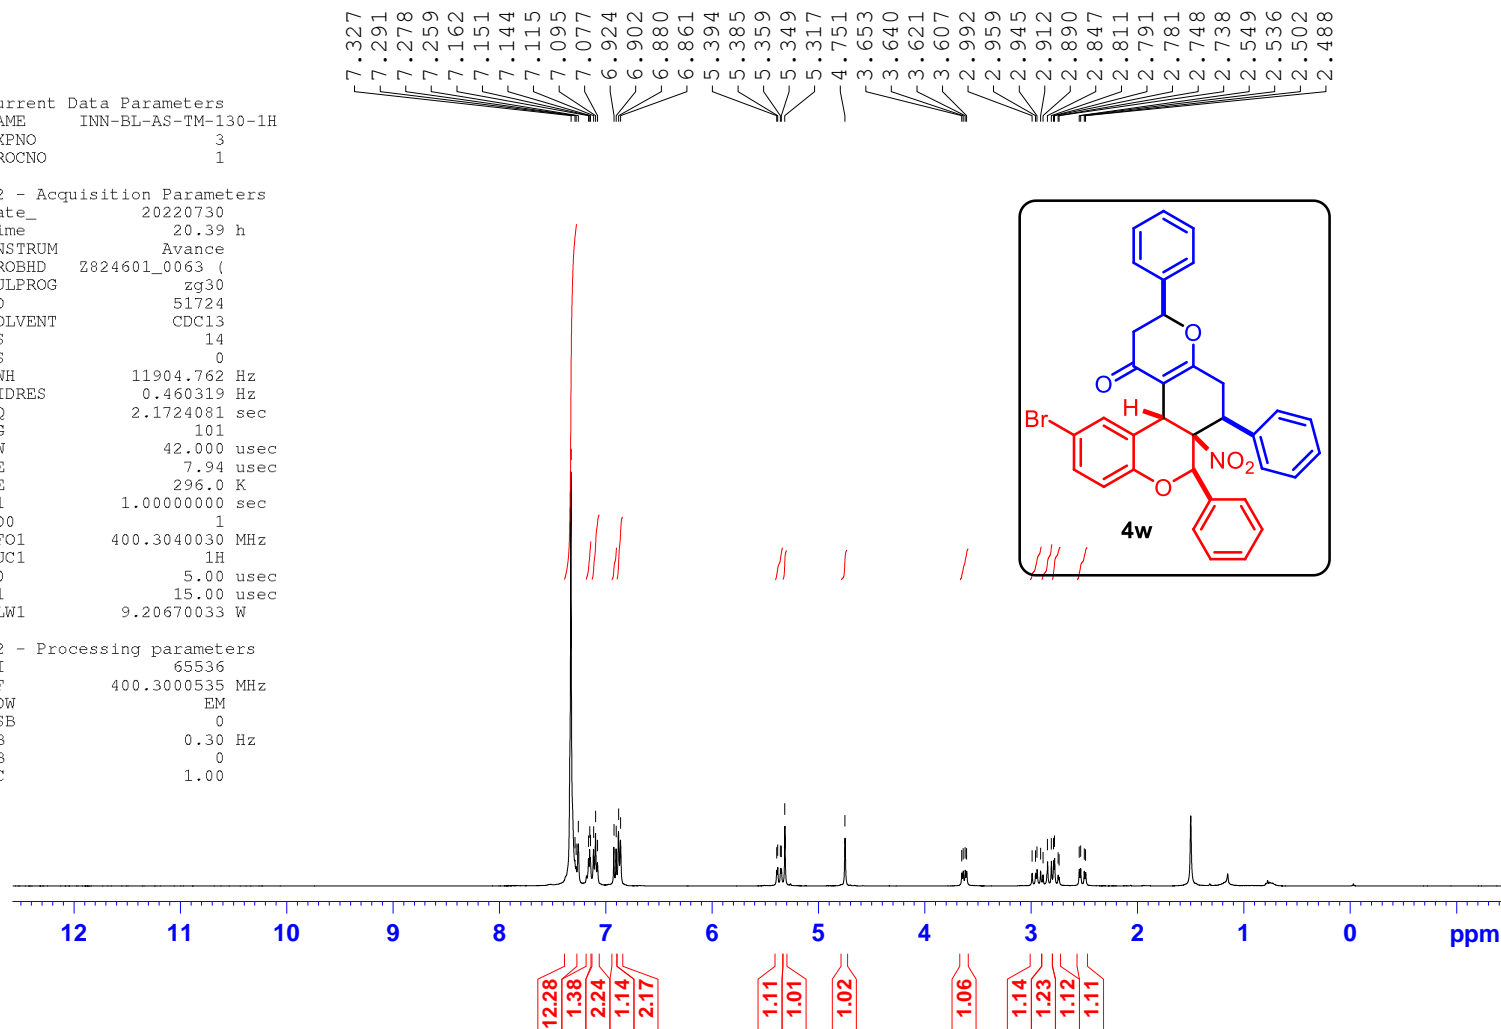

Figure S68. <sup>1</sup>H NMR Spectrum of 4w

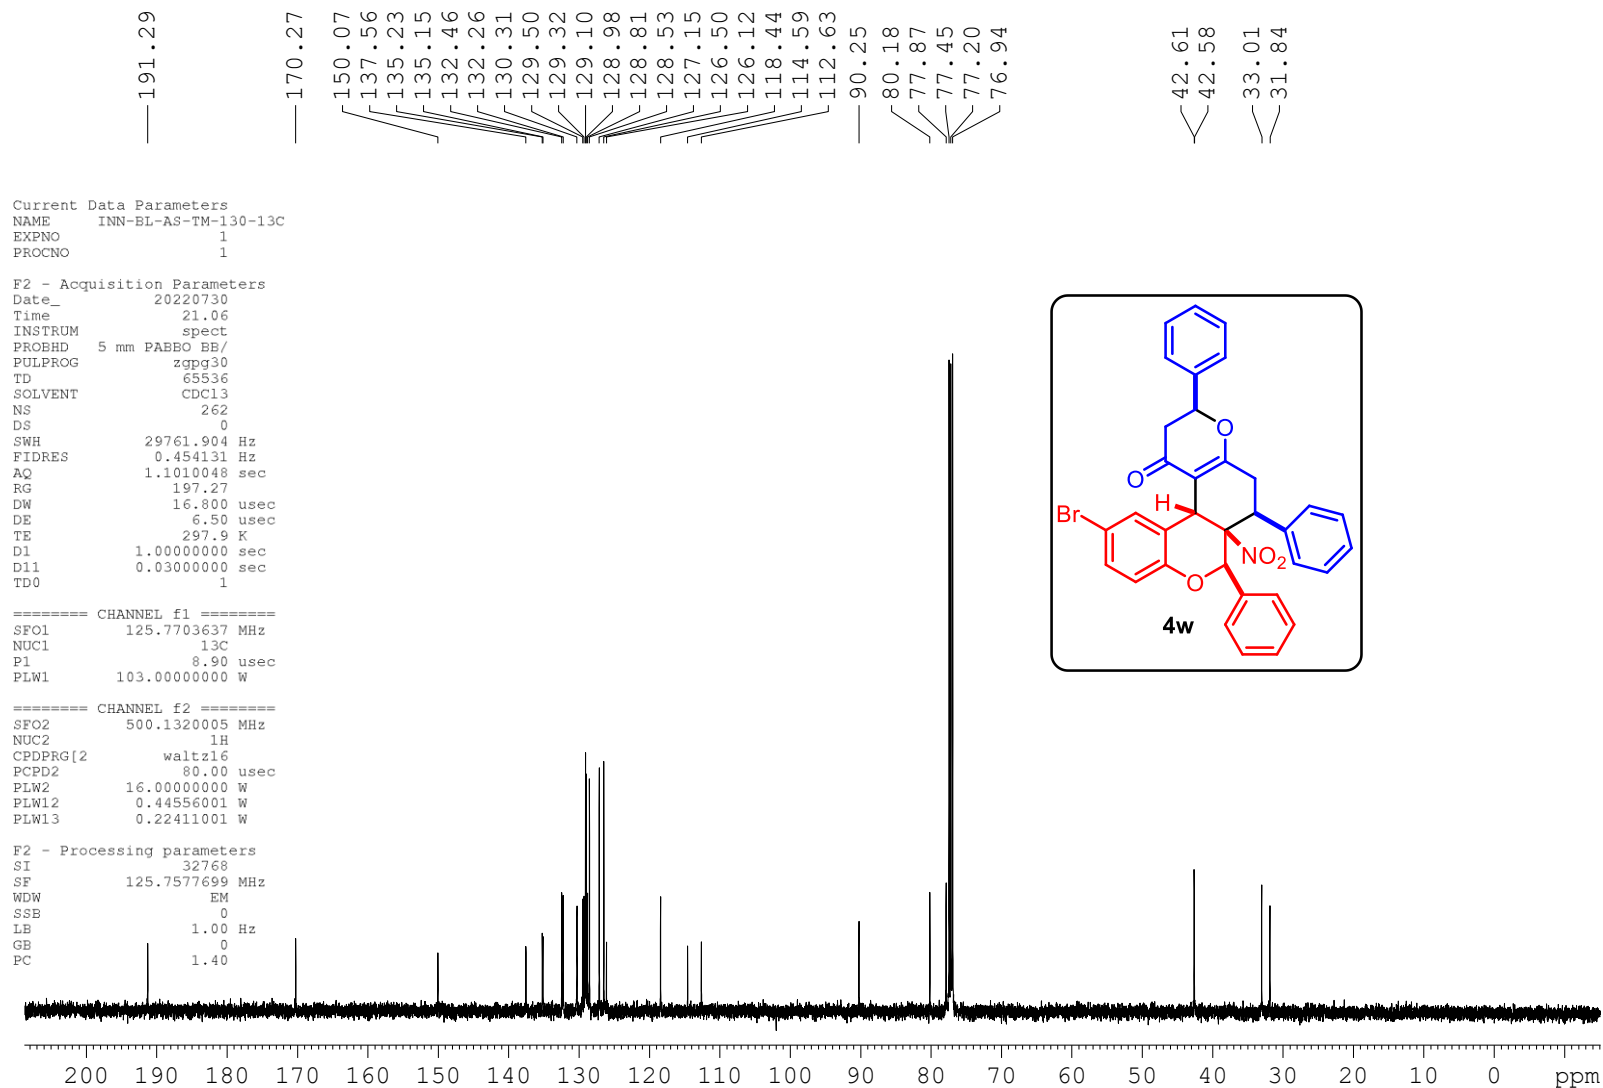

Figure S69.  $^{13}\text{C}$  NMR Spectrum of 4w



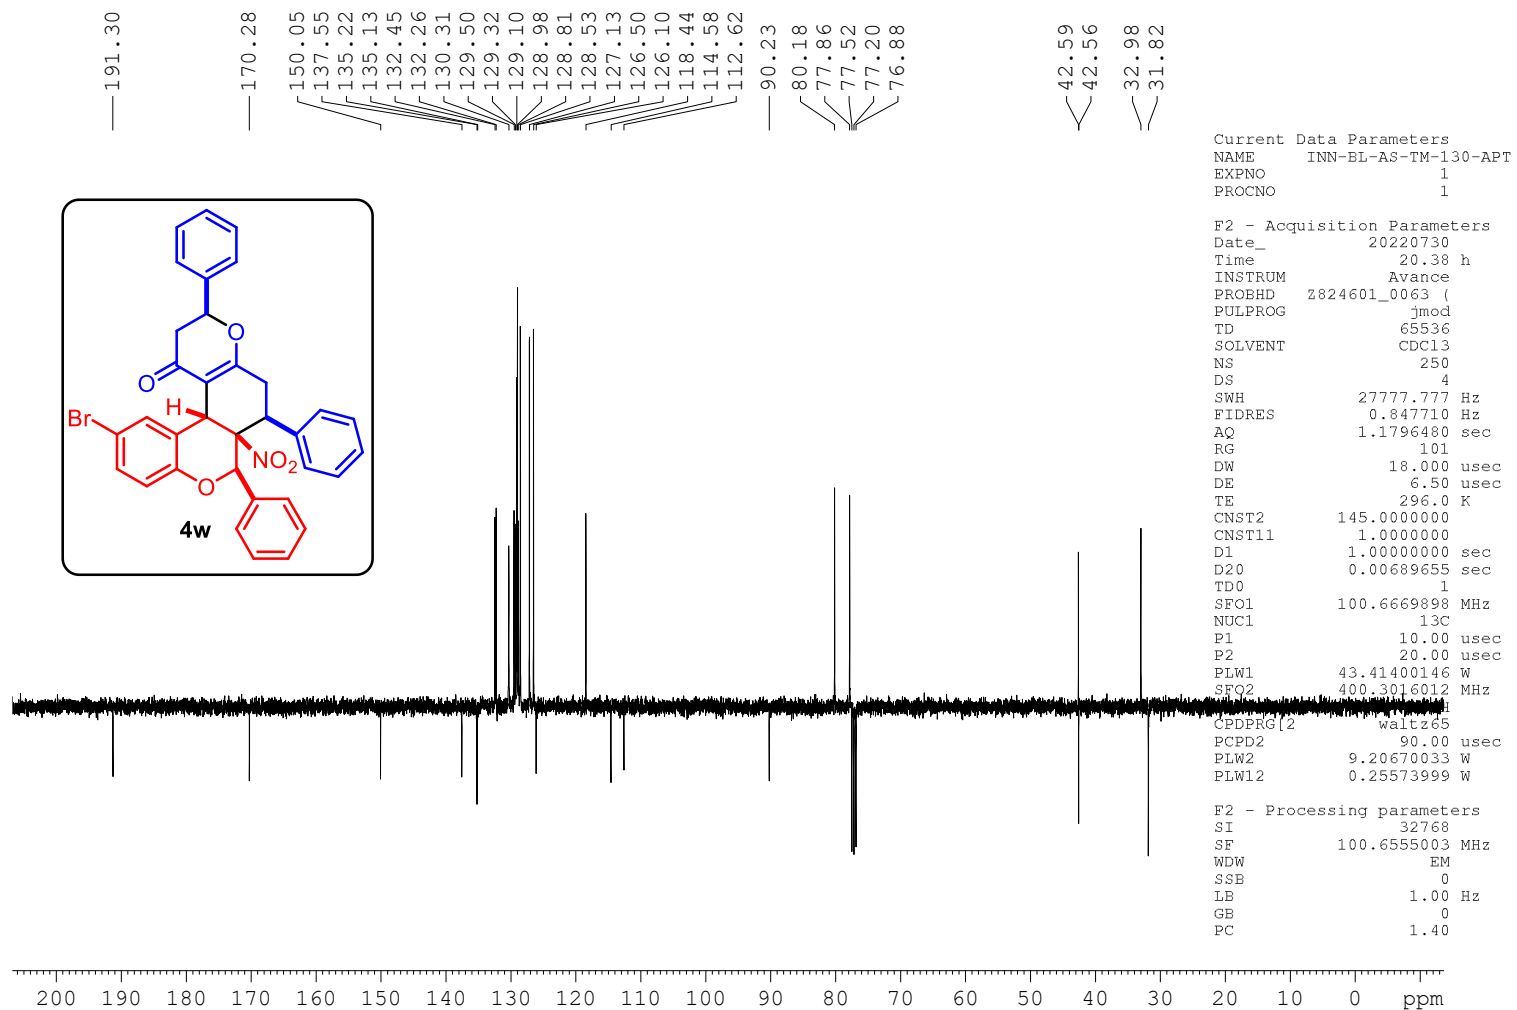

Figure S70. <sup>13</sup>C-APT NMR Spectrum of 4w

# Chromatogram

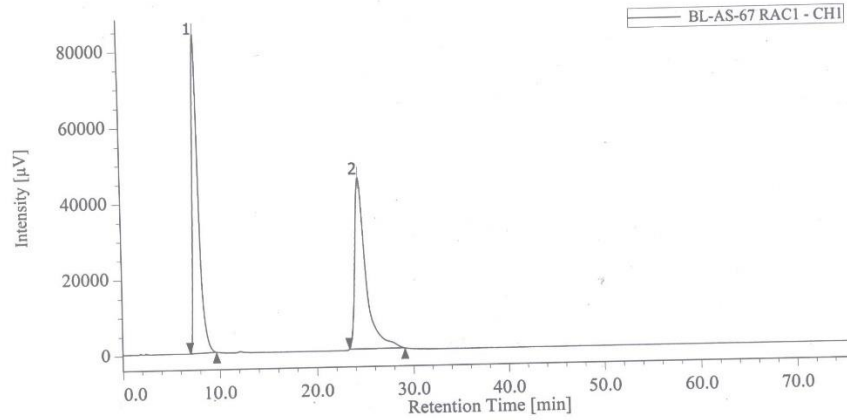

### Chromatogram Information

User Name Administrator  
 Date Modified 2/1/2022 6:32:04 AM  
 Description  
 HPLC System Name JASCO LC-4000  
 Injection Date 2/1/2022 5:16:20 AM  
 Volume 1.00 [µL]  
 Sample # 1  
 Project Name sivasankar  
 Acquisition Time 110.0 [min]  
 Acquisition Sequence BL-AS-67 RAC1  
 Control Method BL-2%-1F-360NM  
 Peak ID Table  
 Calibration Method  
 Additional Information

### Channel & Peak Information Table

Chromatogram Name BL-AS-67 RAC1-CH1  
 Sample Name  
 Channel Name CH1  
 Sampling Interval 500 [msec]  
 Peak Method (Manual)

| # | Peak Name | CH | tR [min] | Area [µV·sec] | Height [µV] | Area%  | Height% | Quantity | NTP  | Resolution | Symmetry Factor | Warning |
|---|-----------|----|----------|---------------|-------------|--------|---------|----------|------|------------|-----------------|---------|
| 1 | Unknown   | 1  | 7.858    | 3545073       | 83703       | 50.070 | 65.075  | N/A      | 876  | 11.809     | 1.235           |         |
| 2 | Unknown   | 1  | 24.542   | 3535139       | 44922       | 49.930 | 34.925  | N/A      | 3072 | N/A        | 1.839           |         |

**Figure S71. HPLC profile of racemic 3b**

## Chromatogram

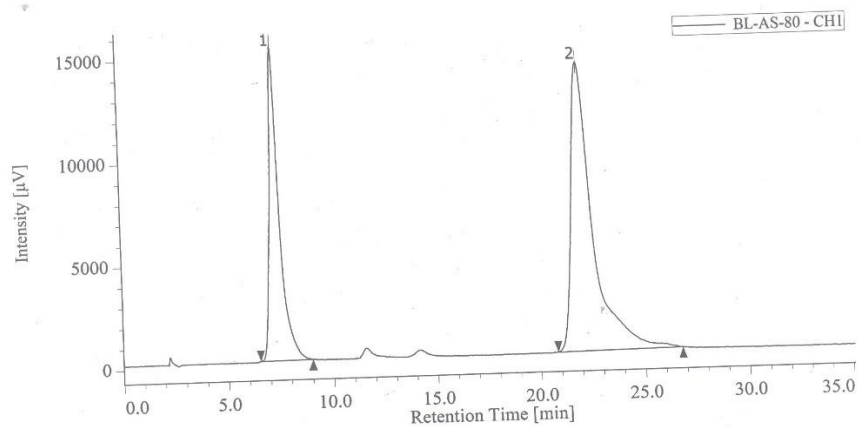

**Chromatogram Information**  
 User Name Administrator  
 Date Modified 3/2/2022 9:13:26 PM  
 Description JASCO LC-4000  
 HPLC System Name 3/2/2022 8:30:06 PM  
 Injection Date 2.00 [µL]  
 Volume 1  
 Sample # sivasankar  
 Project Name 110.0 [min]  
 Acquisition Time BL-AS-80  
 Acquisition Sequence BL-2%-1F-360NM  
 Control Method  
 Peak ID Table  
 Calibration Method  
 Additional Information

**Channel & Peak Information Table**  
 Chromatogram Name BL-AS-80-CH1  
 Sample Name CH1  
 Channel Name 500 [msec]  
 Sampling Interval (Manual)  
 Peak Method

| # | Peak Name | GH | tR [min] | Area [µV·sec] | Height [µV] | Area%  | Height% | Quantity | NTP  | Resolution | Symmetry Factor | Warning |
|---|-----------|----|----------|---------------|-------------|--------|---------|----------|------|------------|-----------------|---------|
| 1 | Unknown   | 1  | 7.367    | 497122        | 15278       | 33.342 | 52.186  | N/A      | 1642 | 12.887     | 1.257           |         |
| 2 | Unknown   | 1  | 22.033   | 993866        | 13999       | 66.658 | 47.814  | N/A      | 3212 | N/A        | 1.937           |         |

**Figure S72. HPLC profile of enantioenriched 3b'**

## Chromatogram

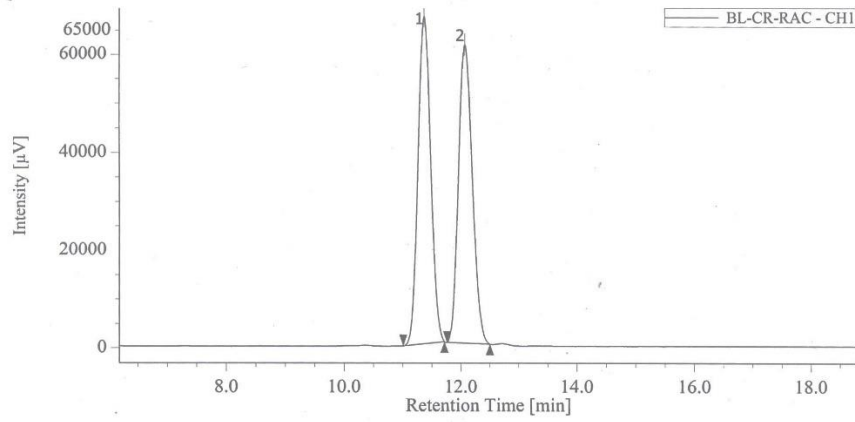

**Chromatogram Information**  
 User Name Administrator  
 Date Modified 2/24/2022 3:58:13 AM  
 Description  
 HPLC System Name JASCO LC-4000  
 Injection Date 2/23/2022 10:06:09 PM  
 Volume 2.00 [µL]  
 Sample # 1  
 Project Name sivasankar  
 Acquisition Time 110.0 [min]  
 Acquisition Sequence BL-CR-RAC  
 Control Method BL-2%-1F-360NM  
 Peak ID Table  
 Calibration Method  
 Additional Information

**Channel & Peak Information Table**  
 Chromatogram Name BL-CR-RAC-CH1  
 Sample Name  
 Channel Name CH1  
 Sampling Interval 500 [msec]  
 Peak Method (Manual)

| # | Peak Name | CH | tR [min] | Area [µV·sec] | Height [µV] | Area%  | Height% | Quantity | NTP   | Resolution | Symmetry Factor | Warning |
|---|-----------|----|----------|---------------|-------------|--------|---------|----------|-------|------------|-----------------|---------|
| 1 | Unknown   | 1  | 11.367   | 1018666       | 66882       | 50.091 | 52.327  | N/A      | 12532 | 1.648      | 1.074           |         |
| 2 | Unknown   | 1  | 12.067   | 1014956       | 60932       | 49.909 | 47.673  | N/A      | 11720 | N/A        | 1.159           |         |

**Figure S73. HPLC profile of racemic 2b**

## Chromatogram

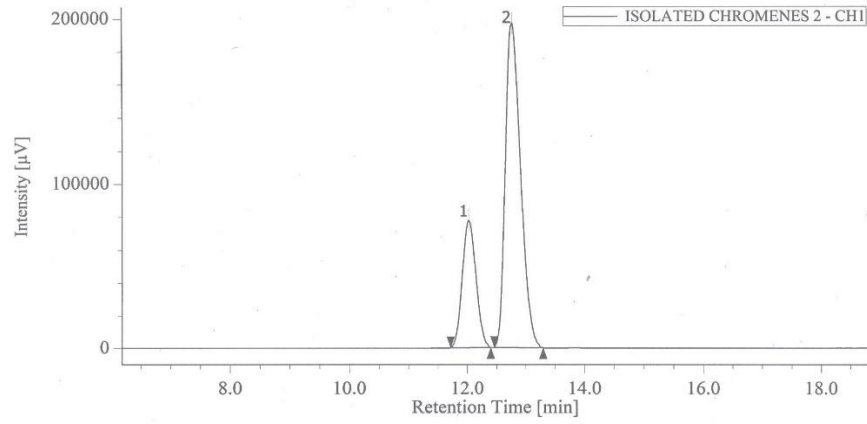

**Chromatogram Information**  
 User Name Administrator  
 Date Modified 2/24/2022 10:02:38 PM  
 Description  
 HPLC System Name JASCO LC-4000  
 Injection Date 2/24/2022 8:58:08 PM  
 Volume 2.00 [µL]  
 Sample # 1  
 Project Name sivasankar  
 Acquisition Time 110.0 [min]  
 Acquisition Sequence ISOLATED CHROM 2  
 Control Method BL-2%-1F-360NM  
 Peak ID Table  
 Calibration Method  
 Additional Information

**Channel & Peak Information Table**  
 Chromatogram Name ISOLATED CHROMENES 2-CH1  
 Sample Name  
 Channel Name CH1  
 Sampling Interval 500 [msec]  
 Peak Method (Manual)

| # | Peak Name | CH | tR [min] | Area [µV·sec] | Height [µV] | Area%  | Height% | Quantity | NTP   | Resolution | Symmetry Factor | Warning |
|---|-----------|----|----------|---------------|-------------|--------|---------|----------|-------|------------|-----------------|---------|
| 1 | Unknown   | 1  | 12.025   | 1259654       | 77574       | 26.149 | 28.301  | N/A      | 12206 | 1.604      | 1.086           |         |
| 2 | Unknown   | 1  | 12.758   | 3557493       | 196526      | 73.851 | 71.699  | N/A      | 11245 | N/A        | 1.326           |         |

**Figure S74. HPLC profile of enantioenriched 2b'**
